# Supplementary material for: Targeted suppression of oral squamous cell carcinoma by pyrimidine-tethered quinoxaline derivatives
Source: Royal Society of Chemistry journal article supplement (doi:10.1039/d4md00042k), 2024-01-01
Supplement: d4md00042k1.pdf [file d4md00042k1.pdf]

## *Supporting Information*

*for*

# Targeted Suppression of Oral Squamous Cell Carcinoma by Pyrimidine-Tethered Quinoxaline Derivatives

Asmita Choithramani<sup>#a</sup>, Rudradip Das<sup>#a</sup>, Gourav Bothra<sup>a</sup>, Priyanka Patel Vatsa<sup>b</sup>, Venkatesh Muthukumar<sup>a</sup>, Bombothu Kavya Sai Bhuvana<sup>b</sup>, Saumya Kapoor<sup>a</sup>, Moola Deepshika<sup>b</sup>, Moumita Ghosh Chowdhury<sup>a</sup>, Amit Mandoli<sup>b\*</sup> and Amit Shard<sup>a\*</sup>

<sup>a</sup>Department of Medicinal Chemistry, National Institute of Pharmaceutical Education and Research-Ahmedabad (NIPER-A), Opposite Airforce station, Palaj, Gandhinagar, Gujarat – 382355, India.

<sup>b</sup>Department of Biotechnology, National Institute of Pharmaceutical Education and Research-Ahmedabad (NIPER-A), Opposite Airforce station, Palaj, Gandhinagar, Gujarat – 382355, India.

# - Equal contribution

## Table of Contents

|                                                                                                                       |            |
|-----------------------------------------------------------------------------------------------------------------------|------------|
| <b>1.Molecular Docking study results .....</b>                                                                        | <b>S3</b>  |
| <b>2.<sup>1</sup>H NMR, <sup>13</sup>C NMR , <sup>19</sup>F NMR, and HRMS data of the synthesized compounds .....</b> | <b>S6</b>  |
| <b>3.<i>In silico</i> ADME results for the synthesized compounds .....</b>                                            | <b>S46</b> |
| <b>4.<i>In vitro</i> study results .....</b>                                                                          | <b>S47</b> |
| <b>5.DFT study results for the compound 12d .....</b>                                                                 | <b>S49</b> |

# 1.Molecular Docking results

**Table S1:** XP Gscores of all the synthesized compounds against the PKM2 (PDB: 3GR4)

| Compound | XP GScore (kcal/mol) | Compound           | XP GScore (kcal/mol) |
|----------|----------------------|--------------------|----------------------|
| 10n      | <b>-8.993</b>        | 10g                | -7.26                |
| 12d      | <b>-8.743</b>        | 10h                | -7.207               |
| 10j      | <b>-8.269</b>        | 10a                | -7.097               |
| 10f      | -8.264               | 10c                | -6.98                |
| 12a      | -8.248               | 10e                | -6.816               |
| 12c      | -7.699               | 10d                | -6.522               |
| 10p      | -7.658               | 12g                | -6.08                |
| 10b      | -7.647               | 12b                | -5.707               |
| 10i      | -7.619               | 12e                | -5.214               |
| 10l      | -7.418               | 12i                | -4.84                |
| 10o      | -7.31                | 12h                | -3.487               |
| 10m      | -7.281               | 12f                | -2.459               |
| 10k      | -7.281               | Standard (DASA-58) | -8.279               |

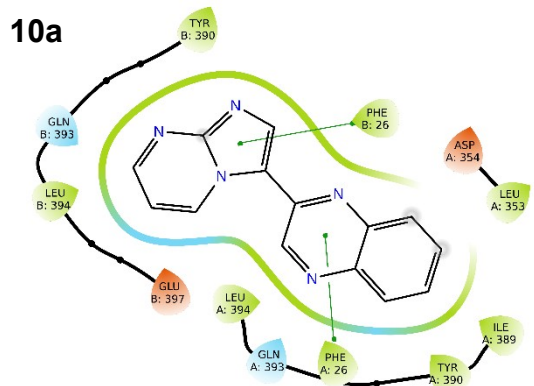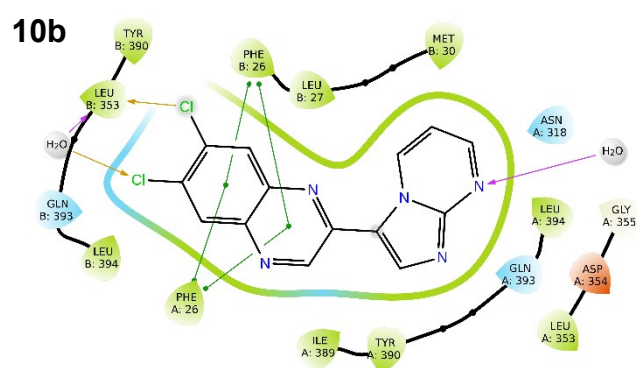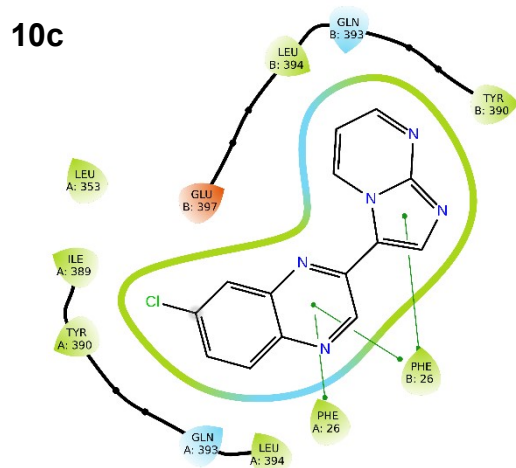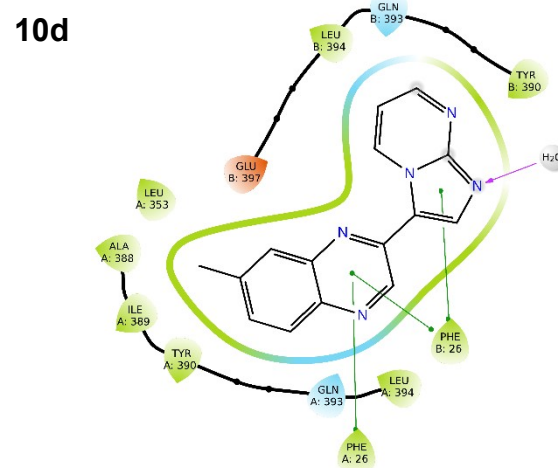

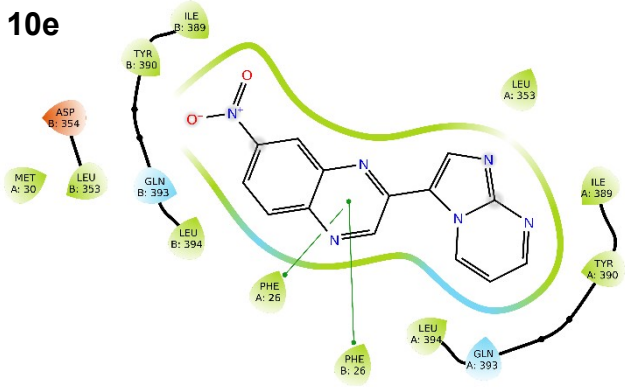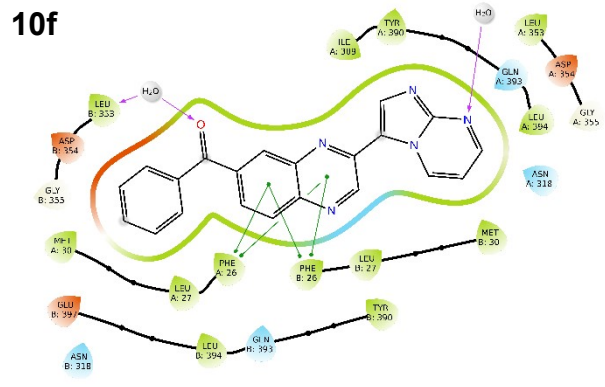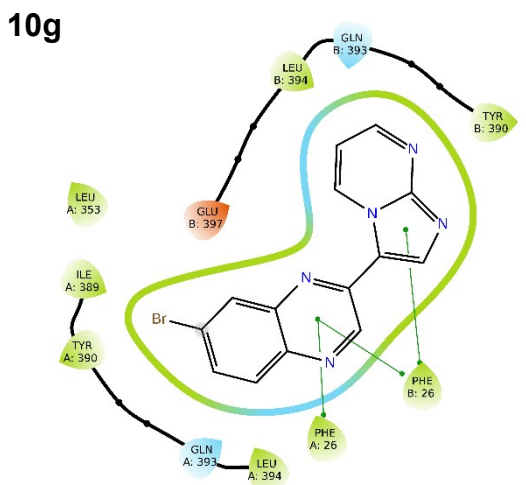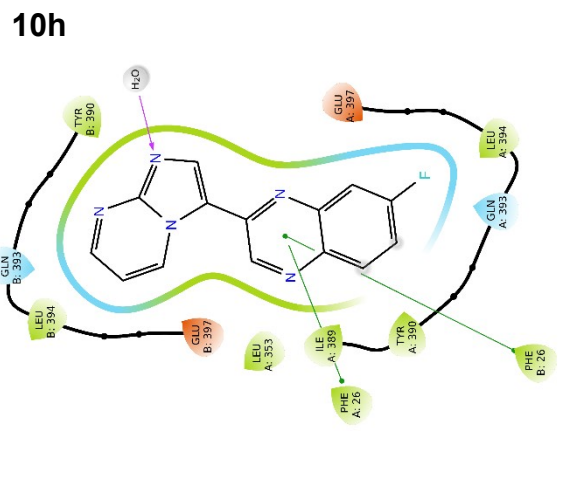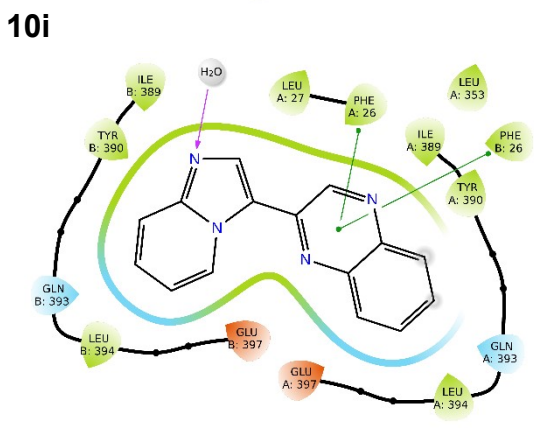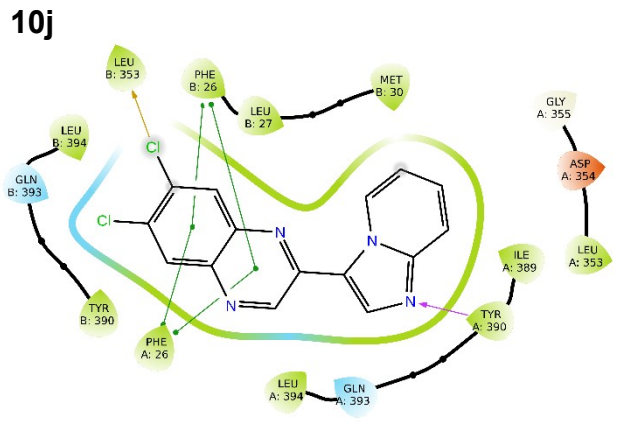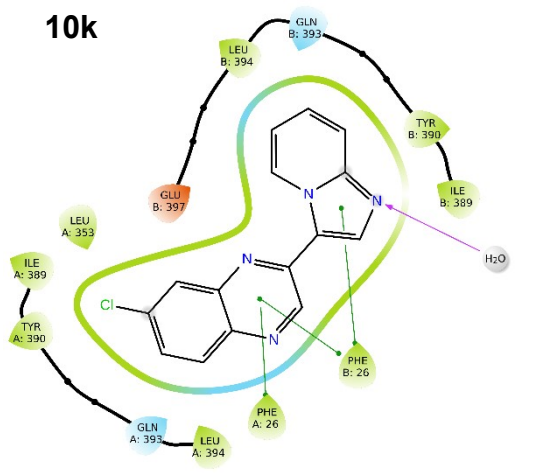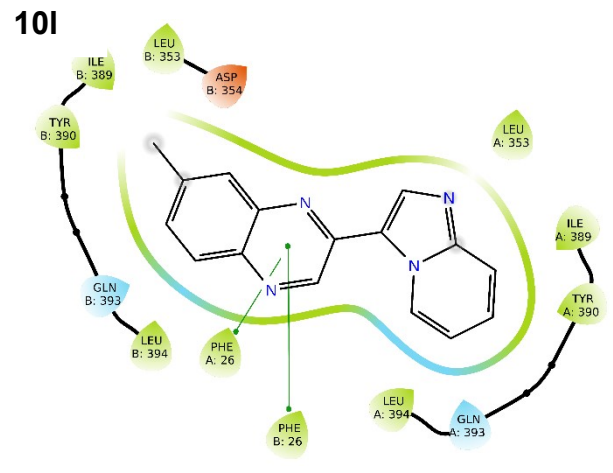

10m

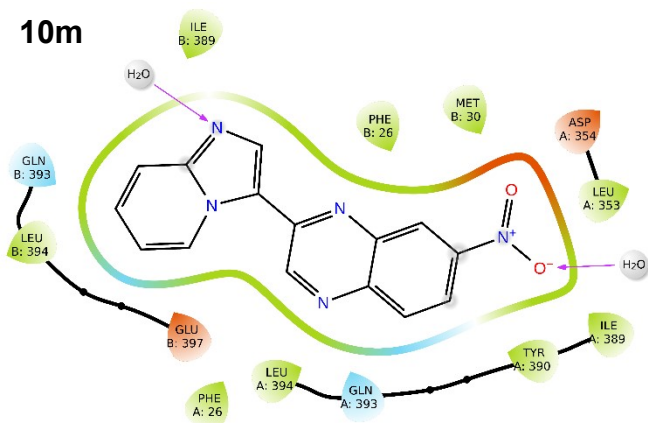

10n

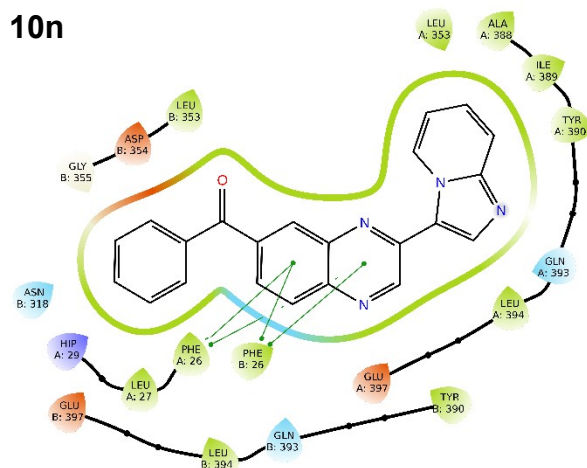

10o

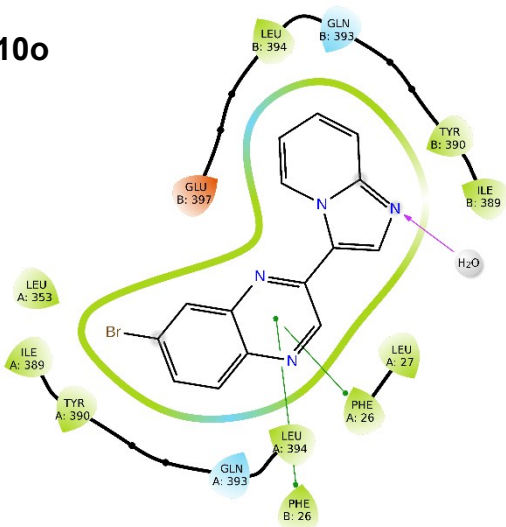

10p

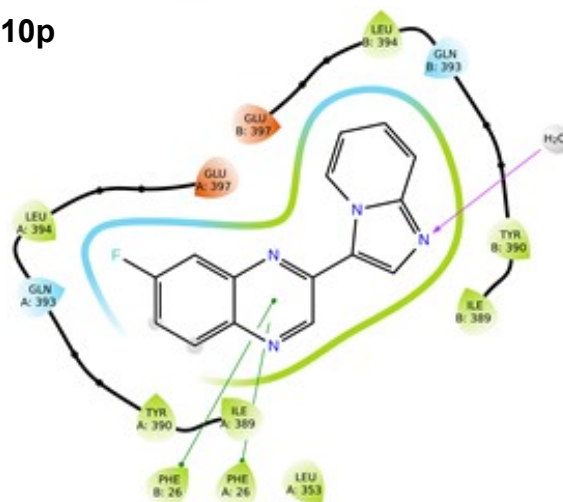

12a

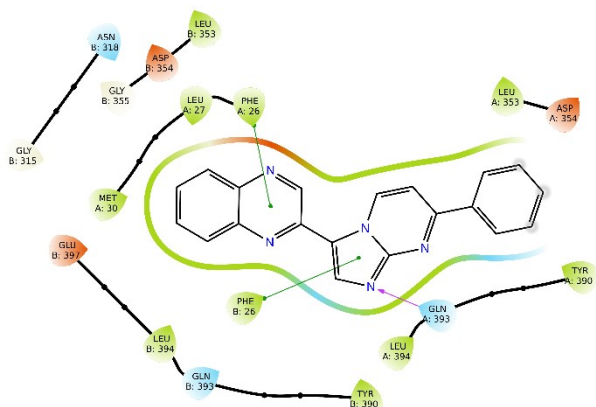

12b

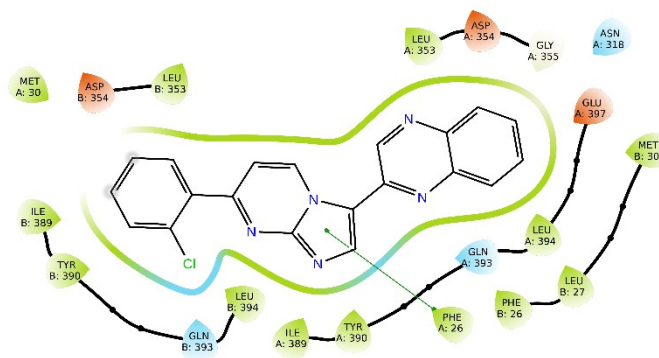

12c

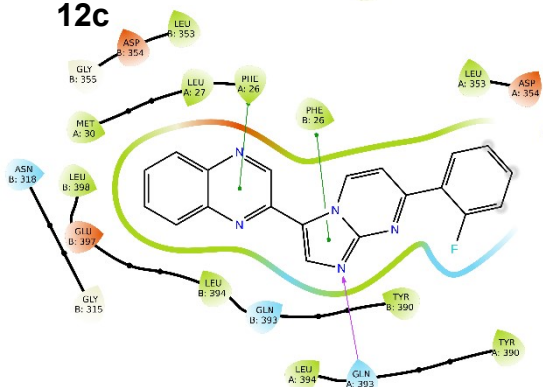

12e

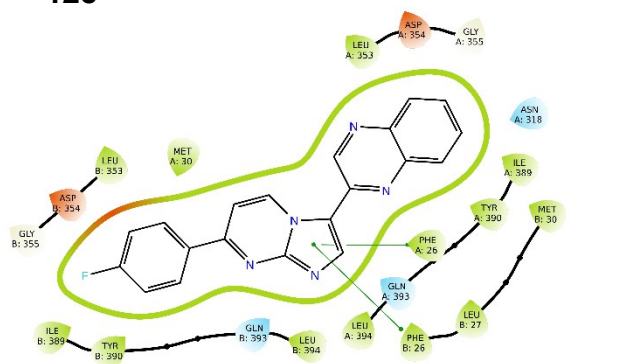





## 2.<sup>1</sup>H NMR, <sup>13</sup>C NMR, <sup>19</sup>F NMR, and HRMS data of the synthesized compounds

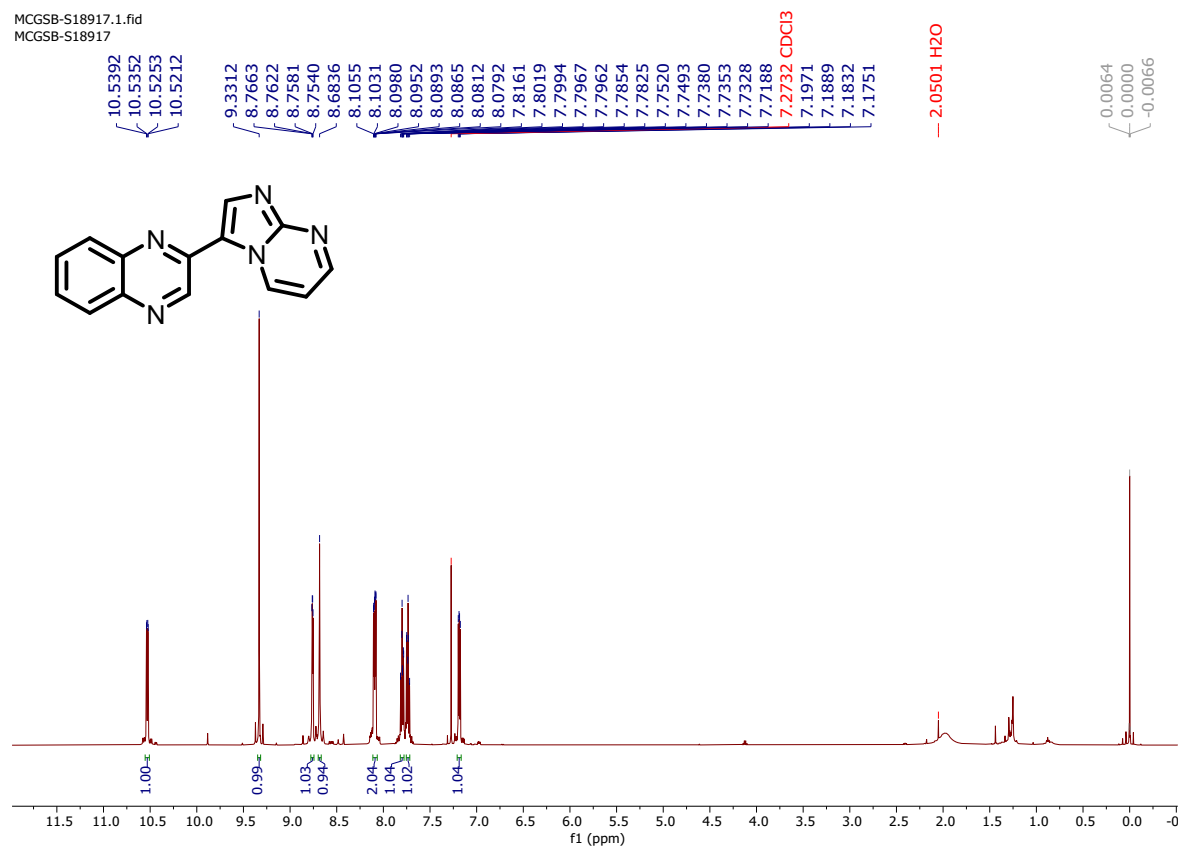

**Figure S2:** <sup>1</sup>H NMR of 2-(imidazo[1,2-a]pyrimidin-3-yl)quinoxaline (10a) in CDCl<sub>3</sub> at 500 MHz

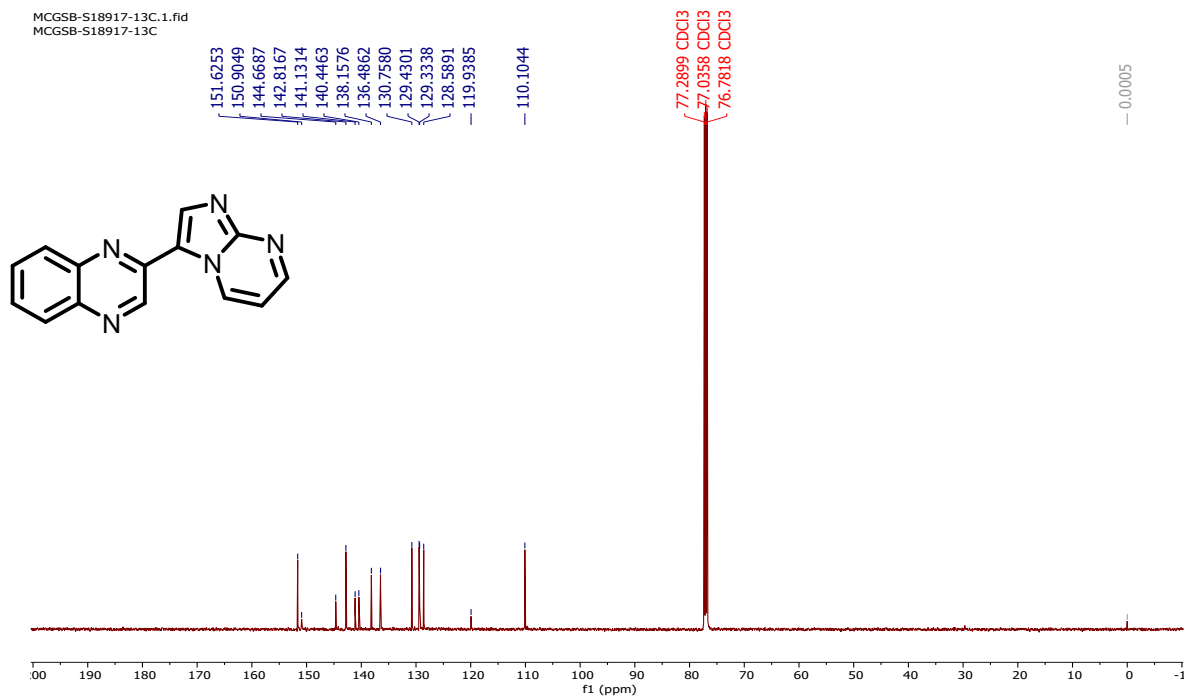

**Figure S3:**  $^{13}\text{C}$  NMR of 2-(imidazo[1,2-a]pyrimidin-3-yl)quinoxaline (**10a**) in  $\text{CDCl}_3$  at 125 MHz

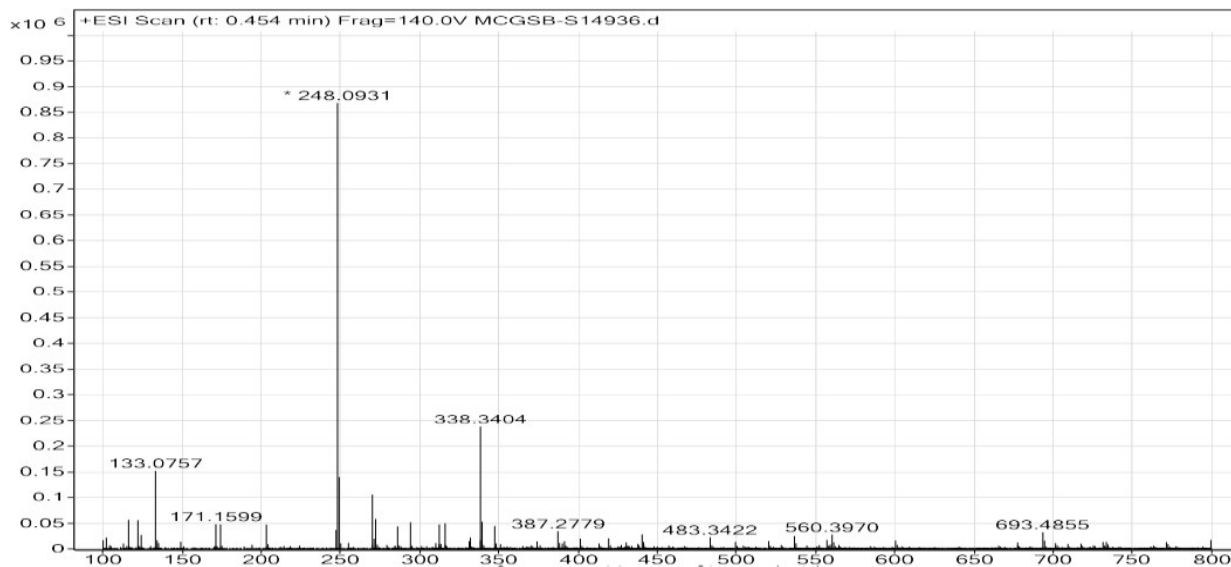

**Figure S4:** HRMS spectra of 2-(imidazo[1,2-a]pyrimidin-3-yl)quinoxaline (**10a**)

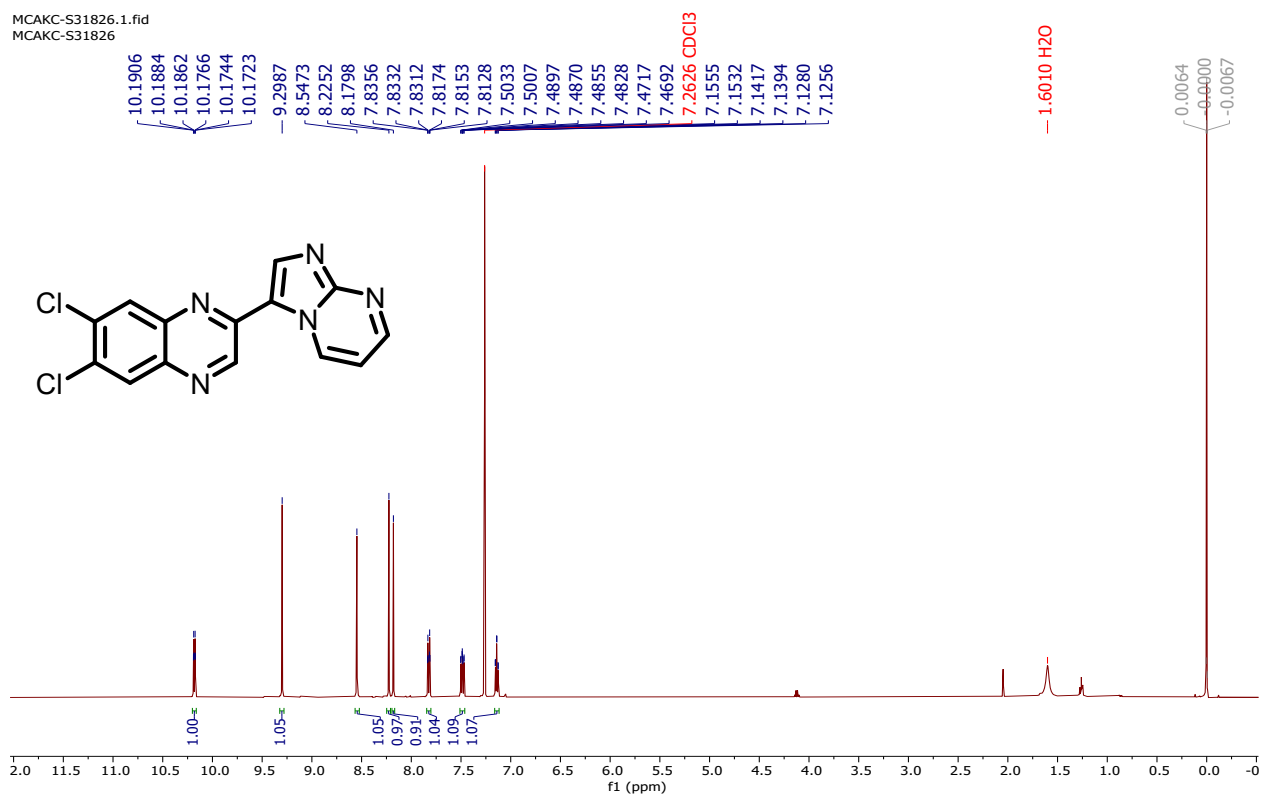

**Figure S5:**  $^1\text{H}$  NMR of 6,7-dichloro-2-(imidazo[1,2-a]pyrimidin-3-yl)quinoxaline (**10b**) in  $\text{CDCl}_3$  at 500 MHz



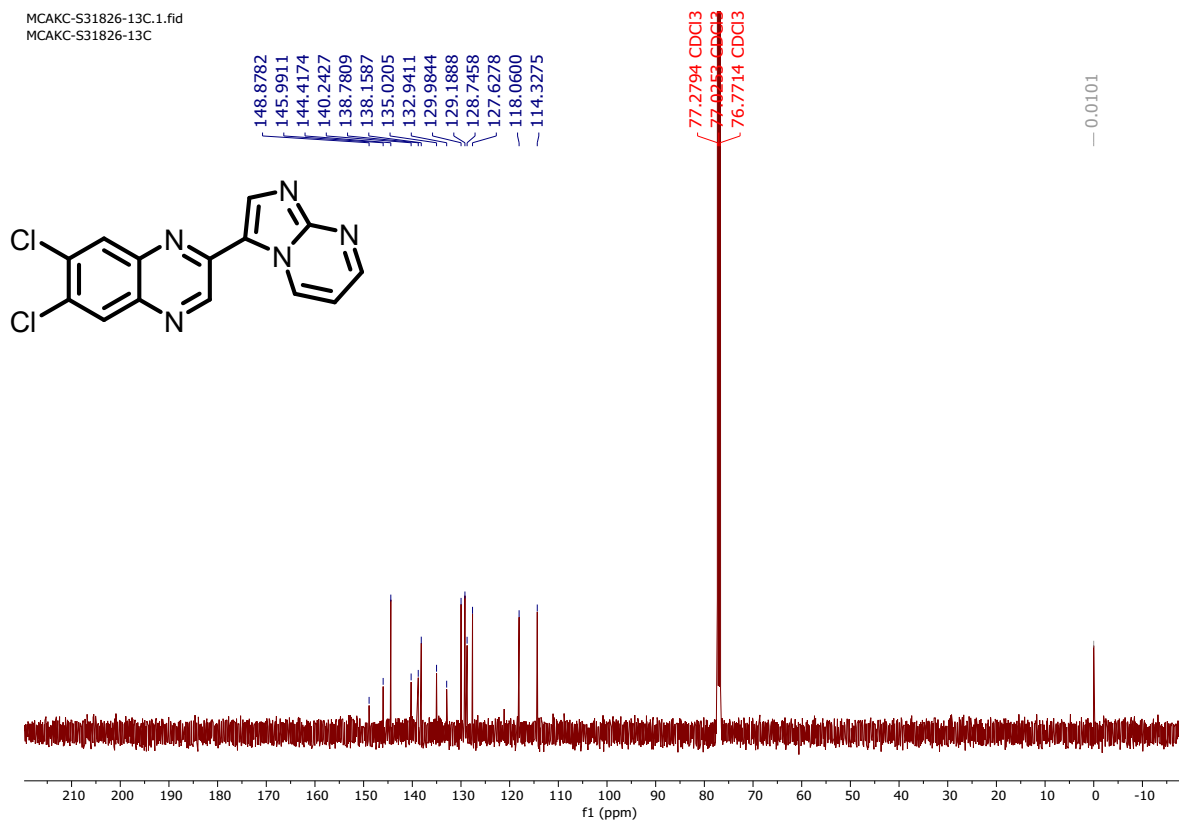

**Figure S6:**  $^{13}\text{C}$  NMR of 6,7-dichloro-2-(imidazo[1,2-a]pyrimidin-3-yl)quinoxaline (10b) in  $\text{CDCl}_3$  at 125 MHz

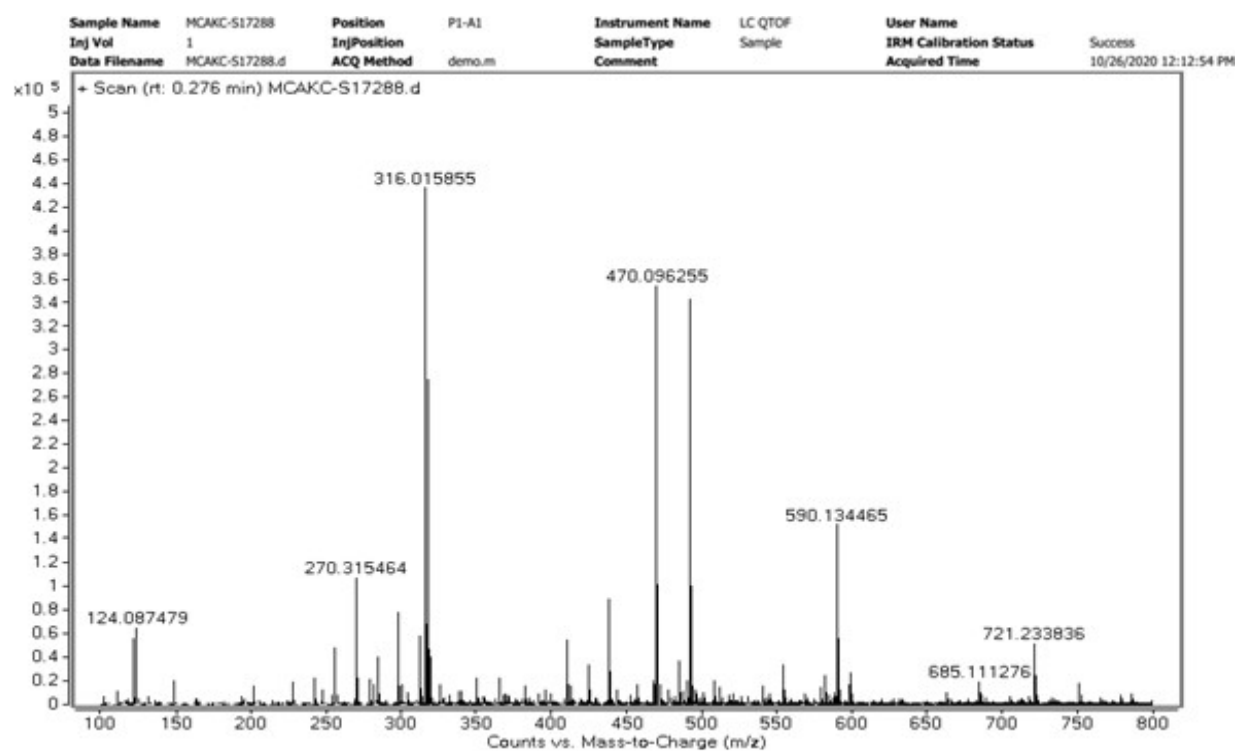

**Figure 7:** HRMS spectra of 6,7-dichloro-2-(imidazo[1,2-a]pyrimidin-3-yl)quinoxaline (10b)

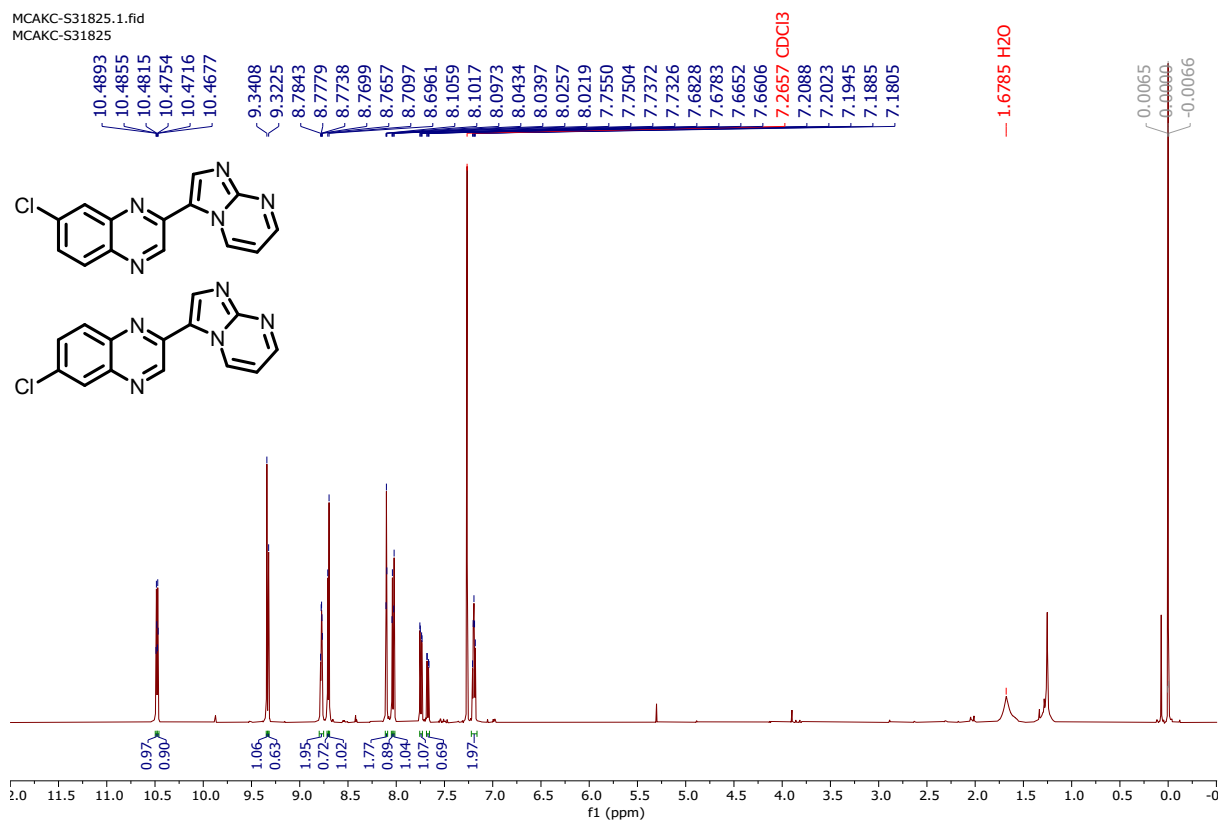

**Figure S8:**  $^1\text{H}$  NMR of 6-chloro-2-(imidazo[1,2-a]pyrimidin-3-yl)quinoxaline & 7-chloro-2-(imidazo[1,2-a]pyrimidin-3-yl)quinoxaline (**10c**) in  $\text{CDCl}_3$  at 500 MHz

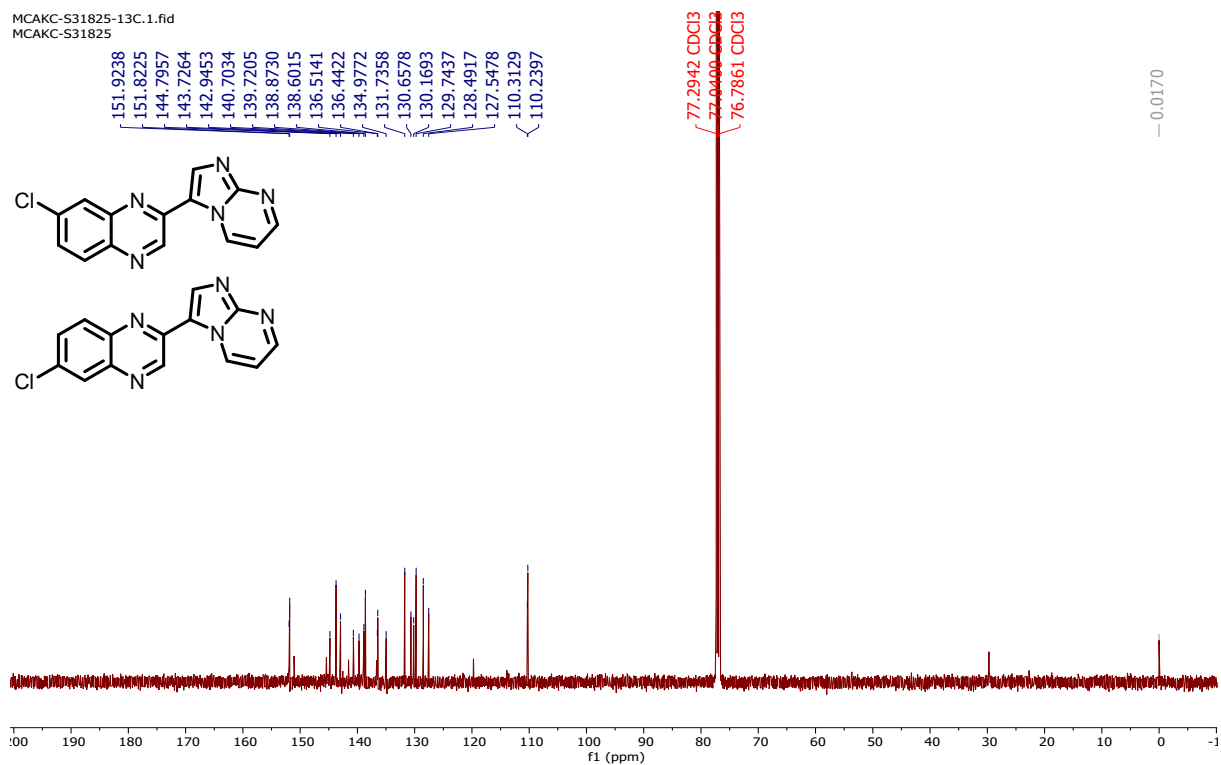

**Figure S9:**  $^{13}\text{C}$  NMR of 6-chloro-2-(imidazo[1,2-a]pyrimidin-3-yl)quinoxaline & 7-chloro-2-(imidazo[1,2-a]pyrimidin-3-yl)quinoxaline (**10c**) in  $\text{CDCl}_3$  at 125 MHz

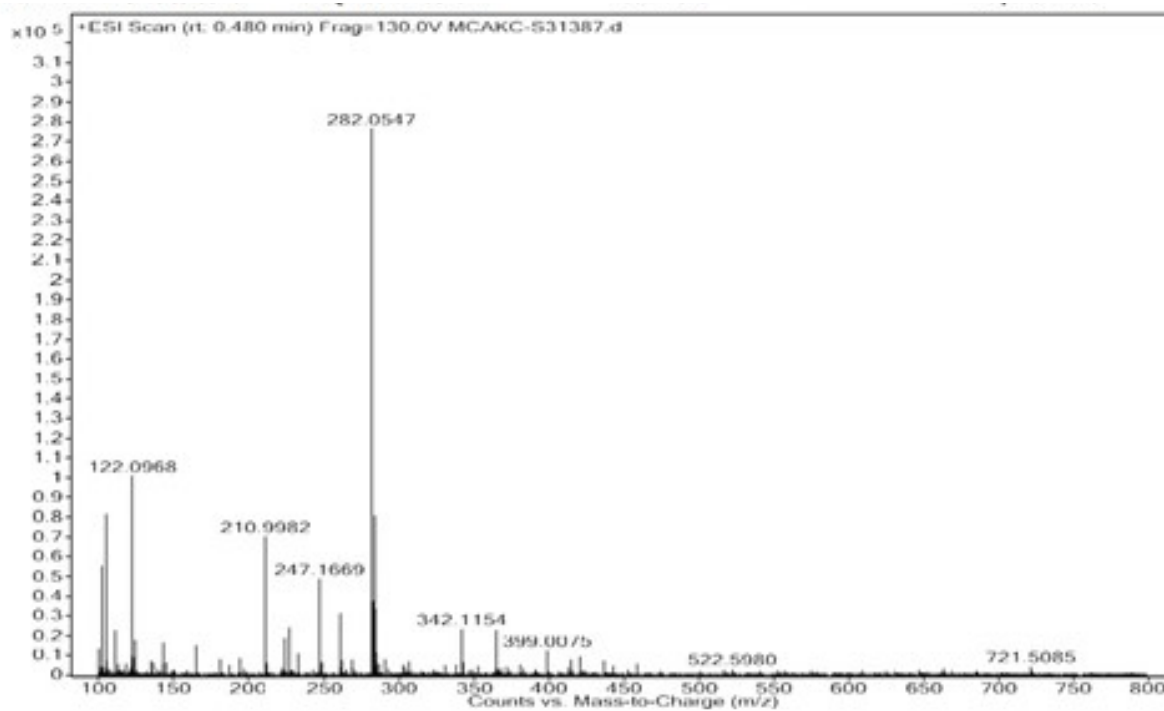

**Figure S10:** HRMS spectra of 6-chloro-2-(imidazo[1,2-a]pyrimidin-3-yl)quinoxaline & 7-chloro-2-(imidazo[1,2-a]pyrimidin-3-yl)quinoxaline (**10c**)

MCAKC-S25667.1.fid  
MCAKC-S25667

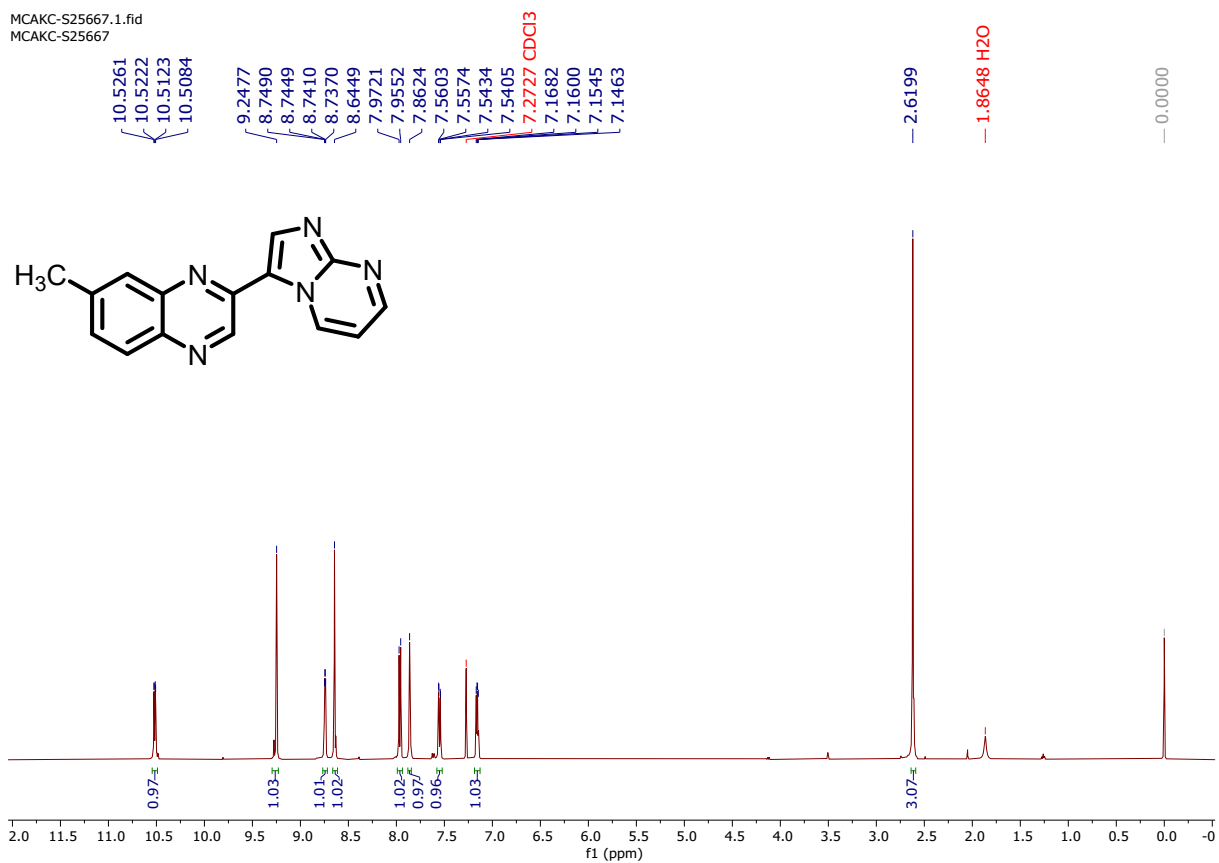

**Figure S11:**  $^1\text{H}$  NMR of 7-methyl-2-(imidazo[1,2-a]pyrimidin-3-yl)quinoxaline (**10d**) in  $\text{CDCl}_3$  at 500 MHz

MCAKC-S25667-13C.1.fid  
MCAKC-S25667-13C

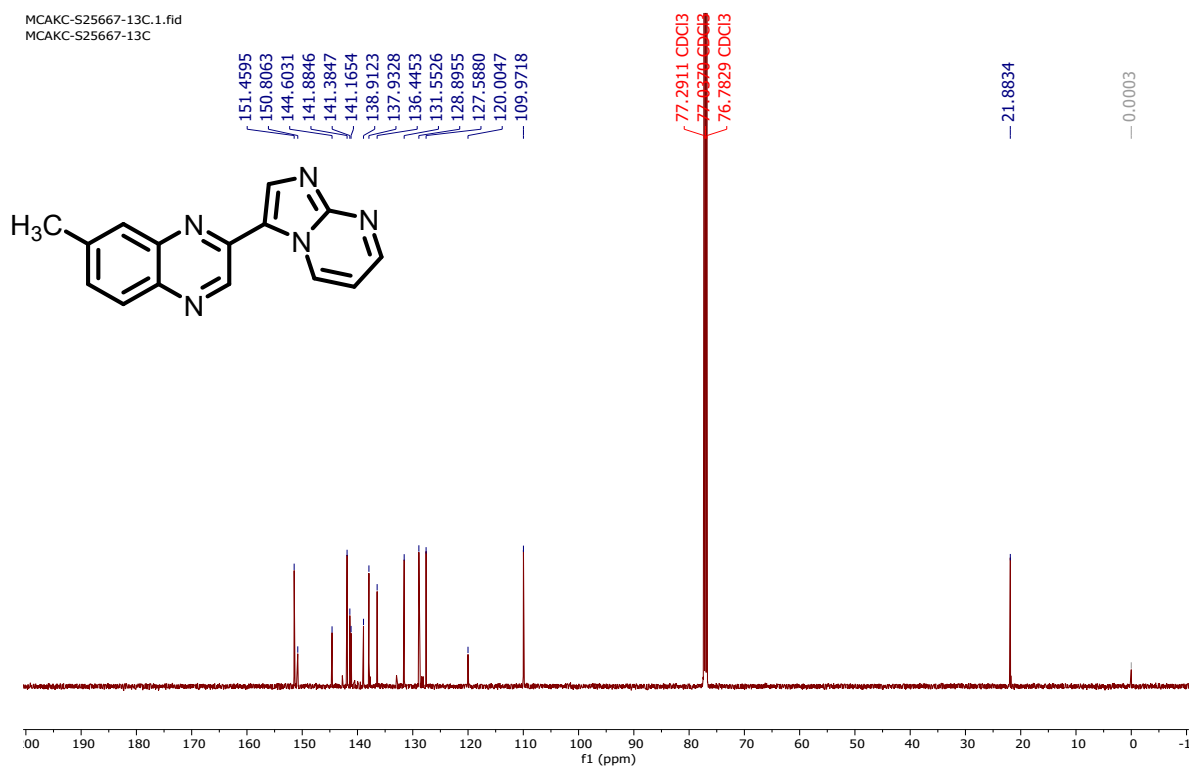

**Figure S12:**  $^{13}\text{C}$  NMR of 7-methyl-2-(imidazo[1,2-a]pyrimidin-3-yl)quinoxaline (**10d**) in  $\text{CDCl}_3$  at 125 MHz

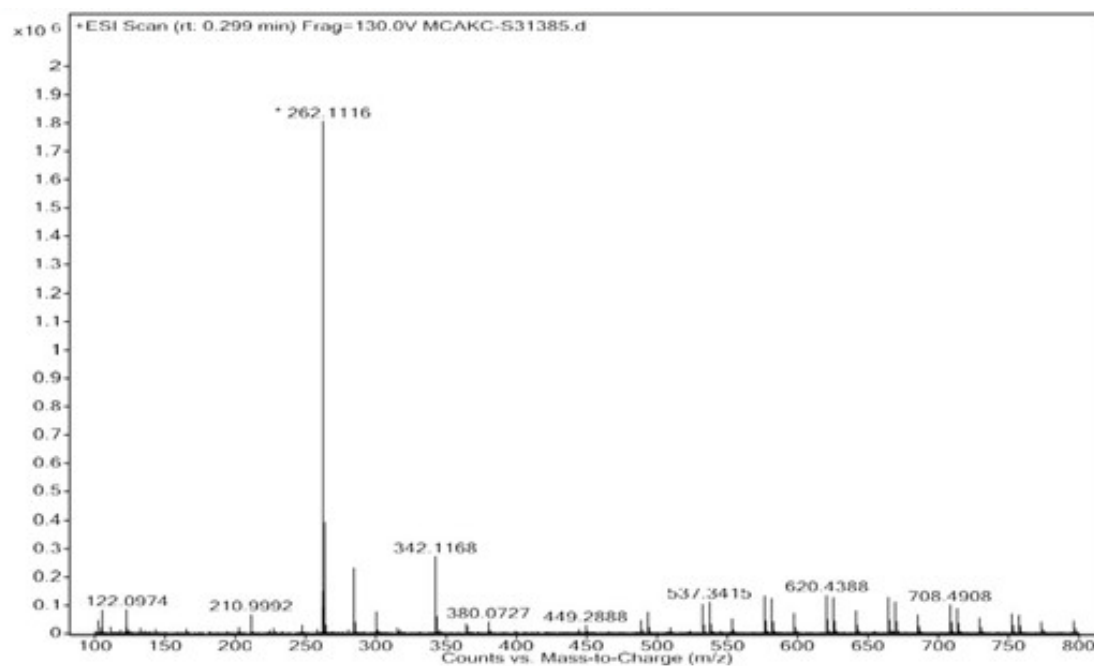

**Figure S13:** HRMS spectra of 7-methyl-2-(imidazo[1,2-a]pyrimidin-3-yl)quinoxaline (**10d**)

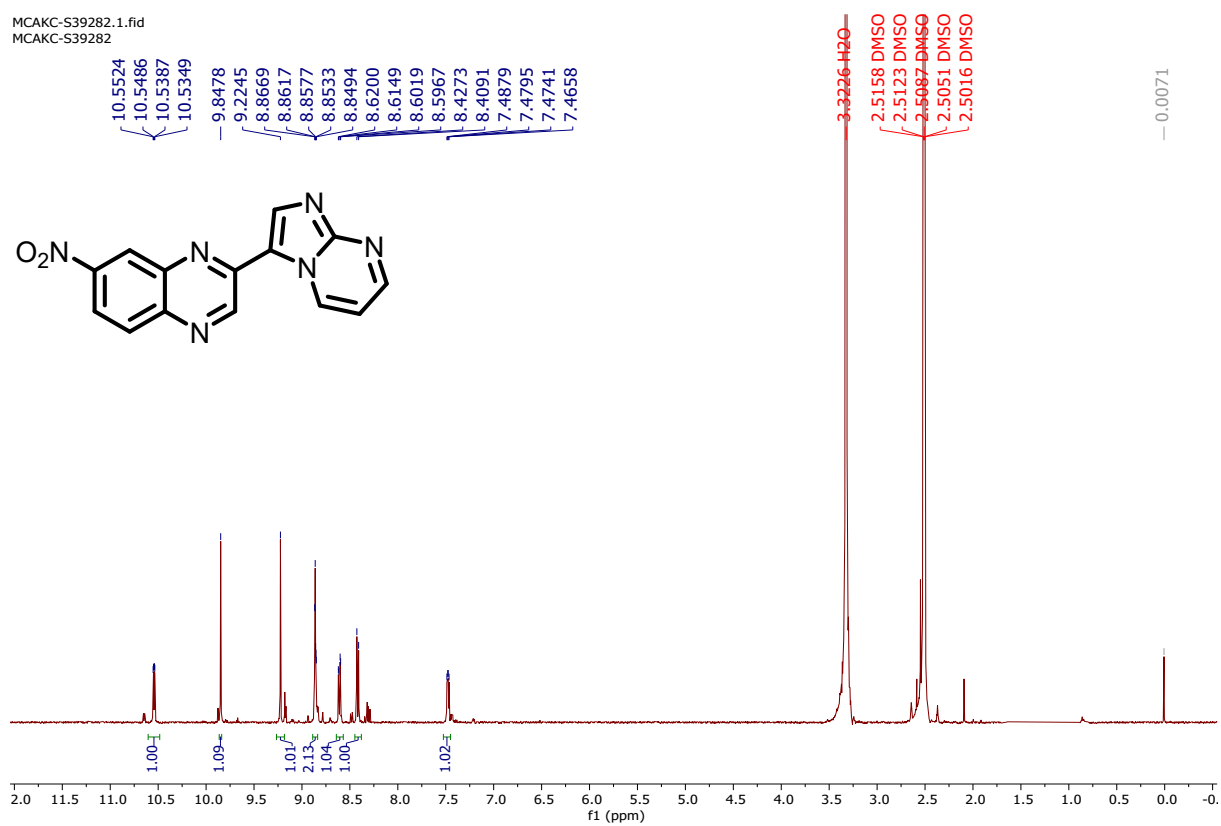

**Figure S14:**  $^1\text{H}$  NMR of 7-nitro-2-(imidazo[1,2-a]pyrimidin-3-yl)quinoxaline (**10e**) in  $\text{DMSO-}d_6$  at 500 MHz

MCAKC-S39282-13C.1.fid  
MCAKC-S39282-13C

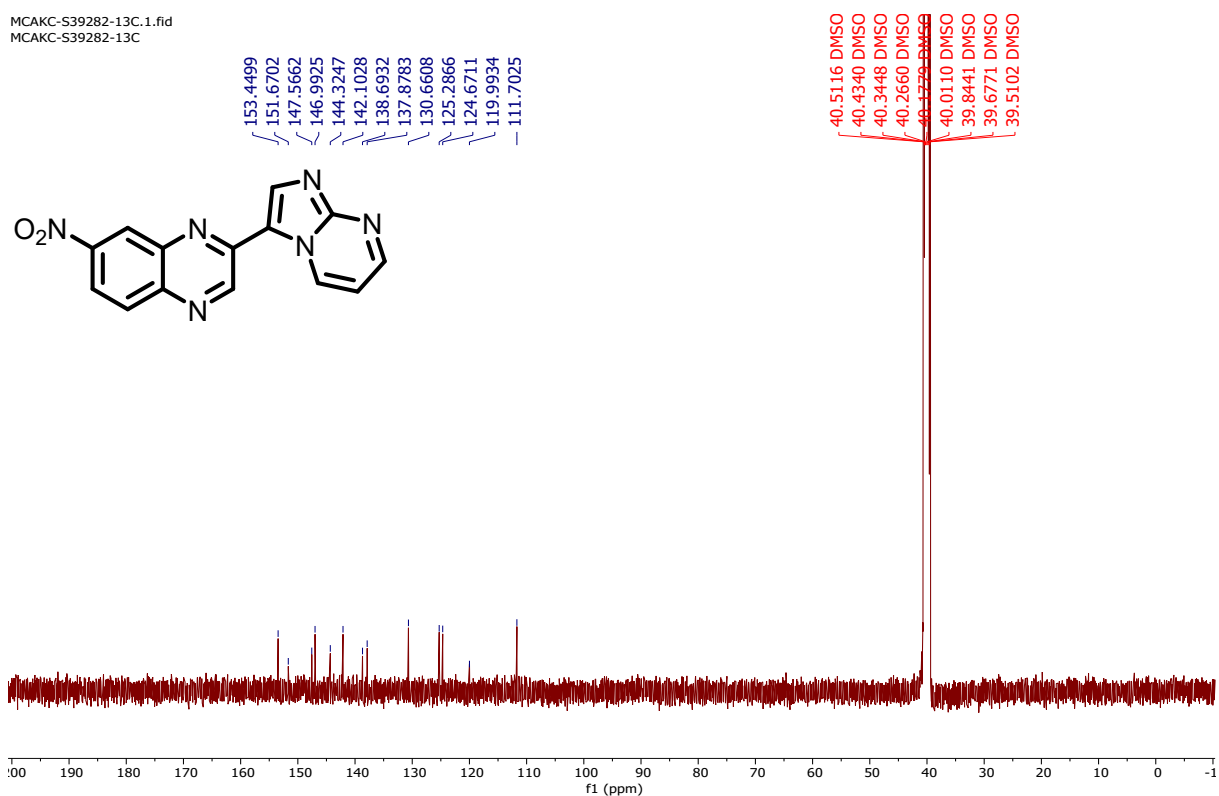

**Figure S15:** <sup>13</sup>C NMR of 7-nitro-2-(imidazo[1,2-a]pyrimidin-3-yl)quinoxaline (10e) in DMSO-*d*<sub>6</sub> at 125 MHz

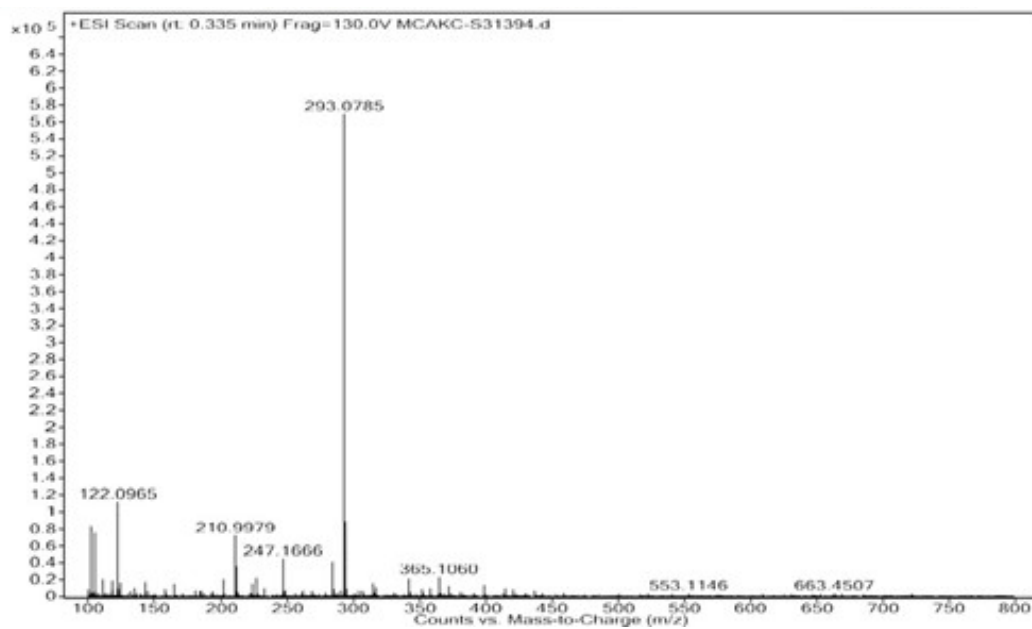

**Figure S16:** HRMS spectra of 7-nitro-2-(imidazo[1,2-a]pyrimidin-3-yl)quinoxaline (10e)

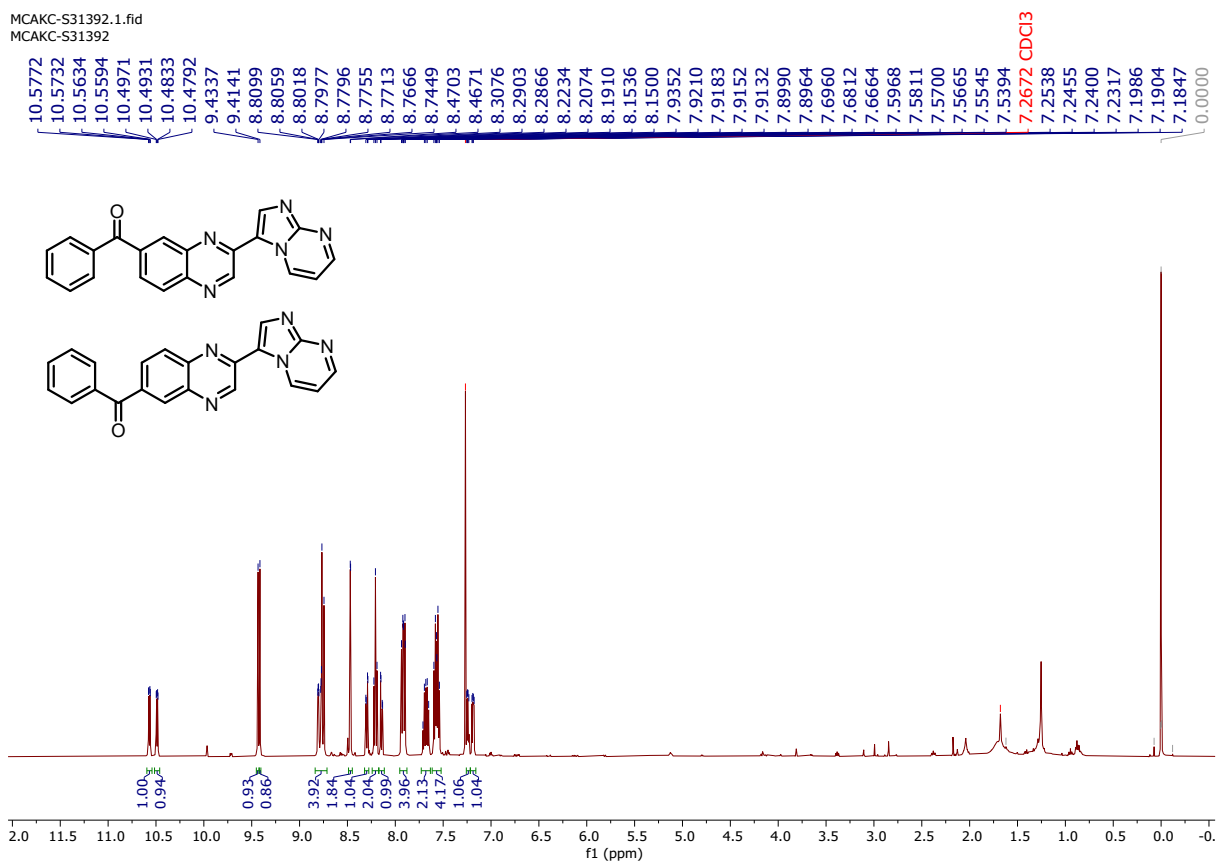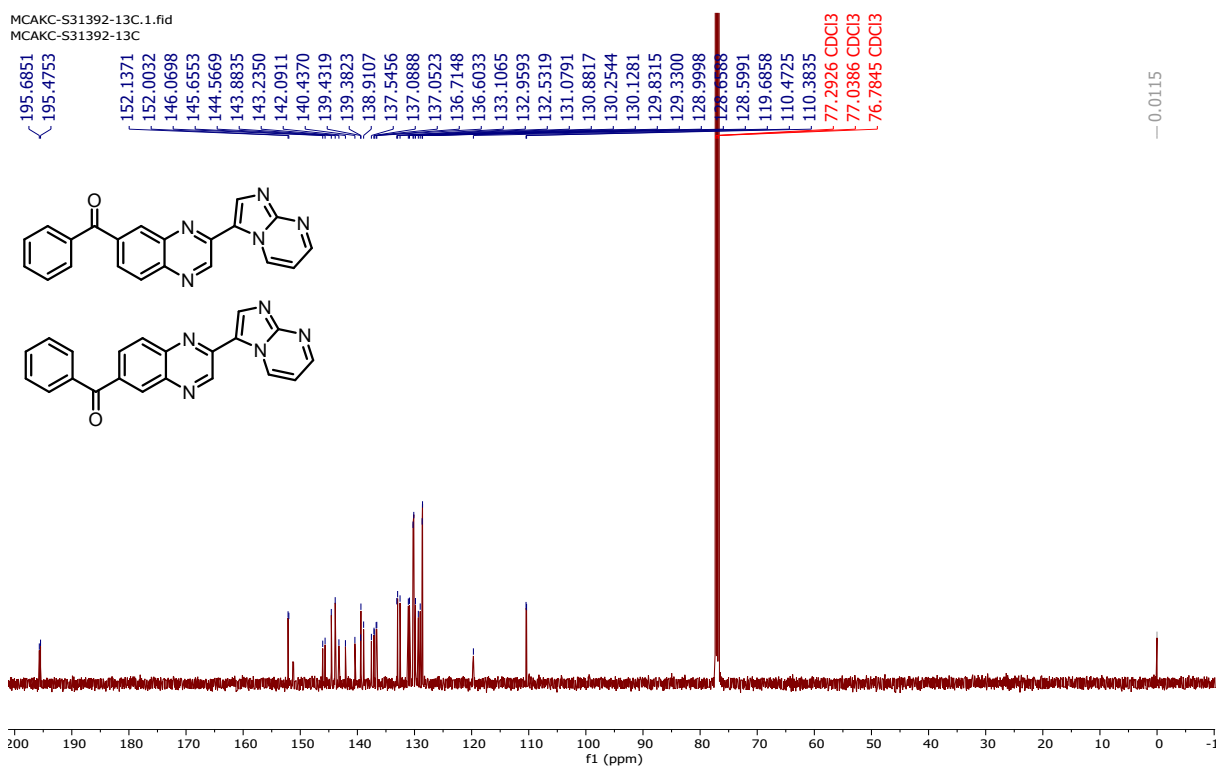



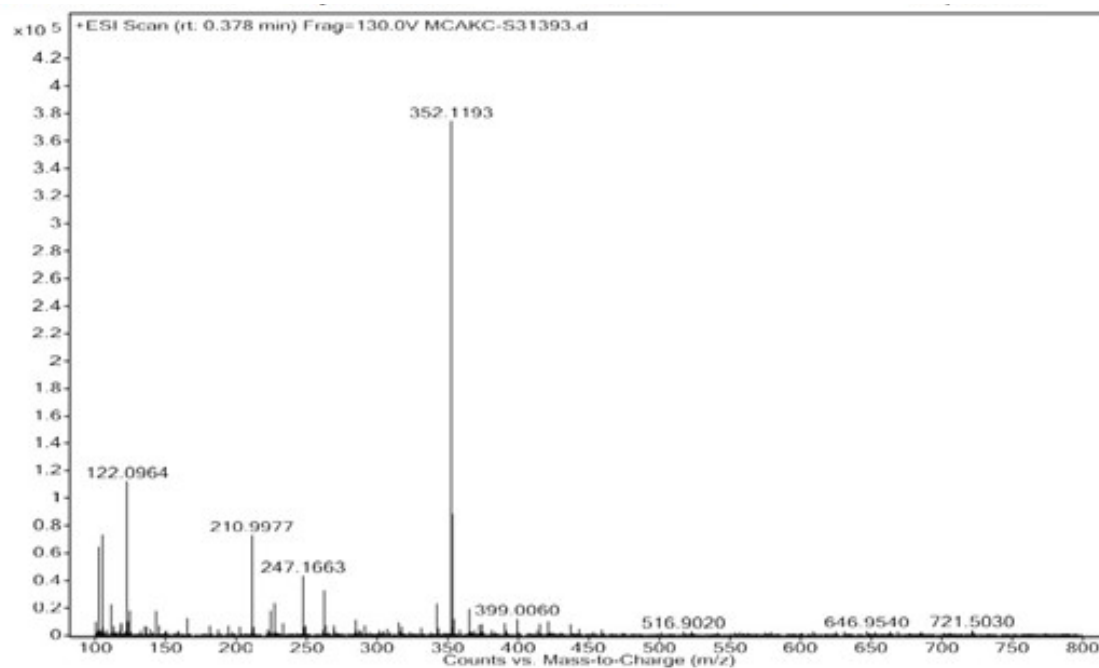

**Figure S19:** HRMS spectra of 6-phenoxy-2-(imidazo[1,2-a]pyrimidin-3-yl) quinoxaline & 7-phenoxy-2-(imidazo[1,2-a]pyrimidin-3-yl) quinoxaline (**10f**)

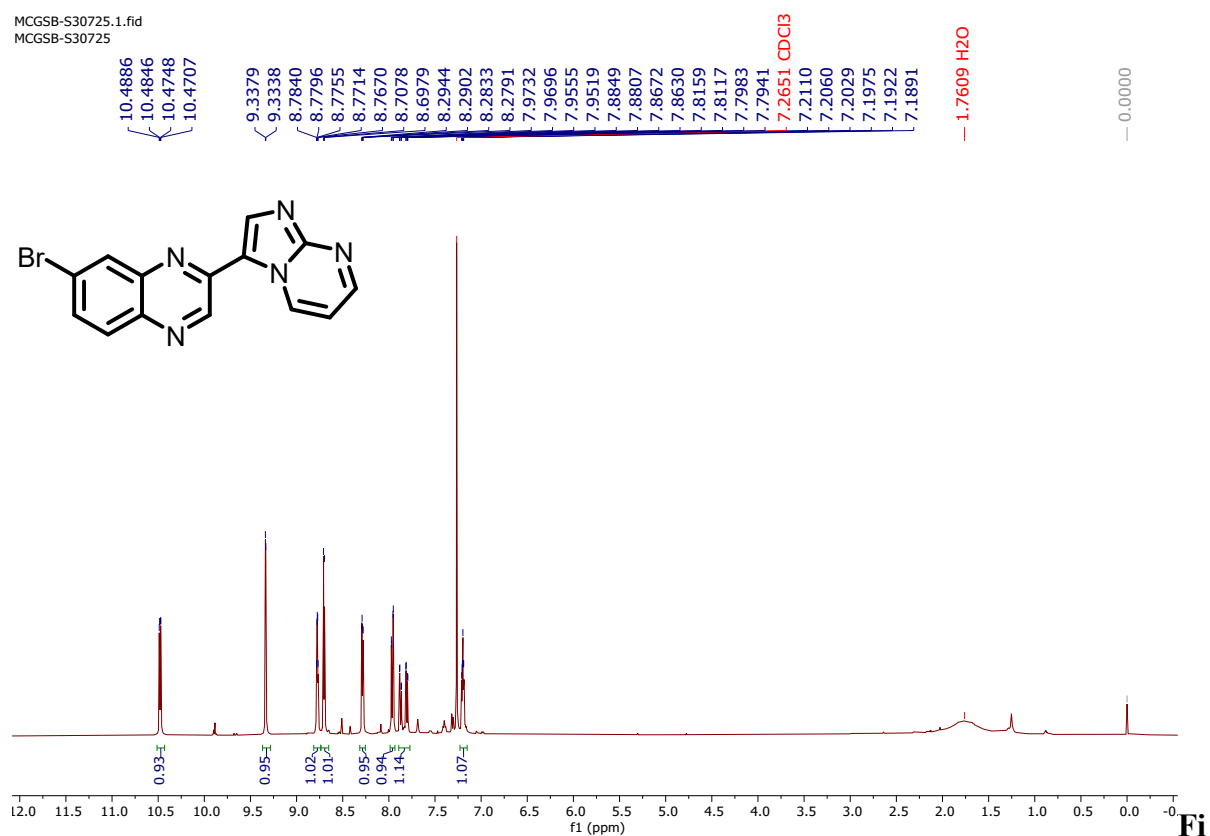

**Figure S20:**  $^1\text{H}$  NMR of 7-bromo-2-(imidazo[1,2-a]pyrimidin-3-yl)quinoxaline (**10g**) in  $\text{CDCl}_3$  at 500 MHz

MCGSB-S30725-13C.1.fid  
MCGSB-S30725-13C

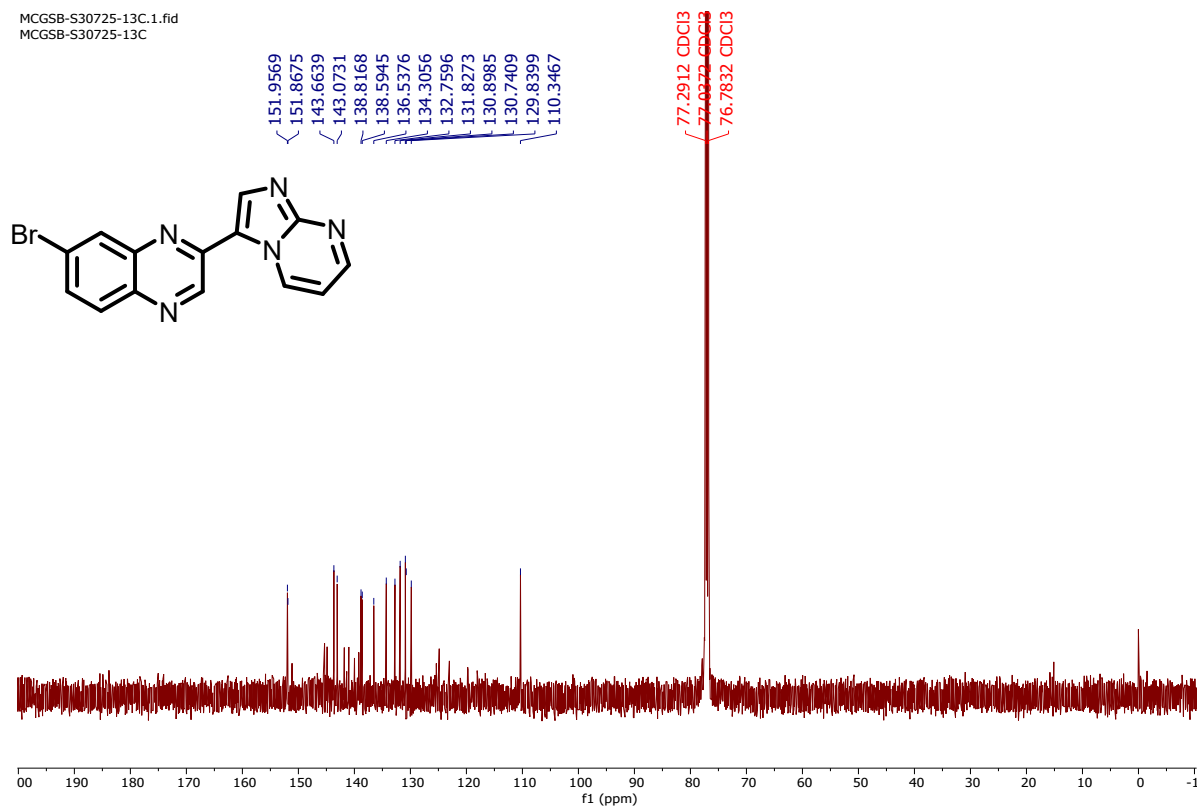

**Figure S21:** <sup>13</sup>C NMR of 7-bromo-2-(imidazo[1,2-a]pyrimidin-3-yl)quinoxaline (10g) in CDCl<sub>3</sub> at 125 MHz

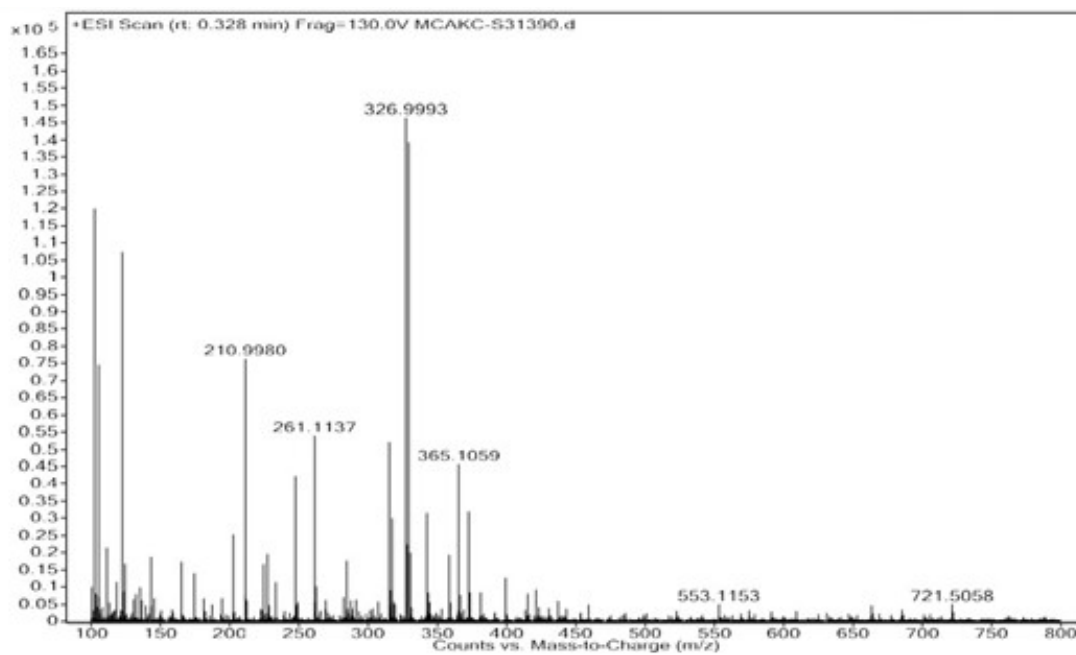

**Figure S22:** HRMS spectra of 7-bromo-2-(imidazo[1,2-a]pyrimidin-3-yl)quinoxaline (10g)

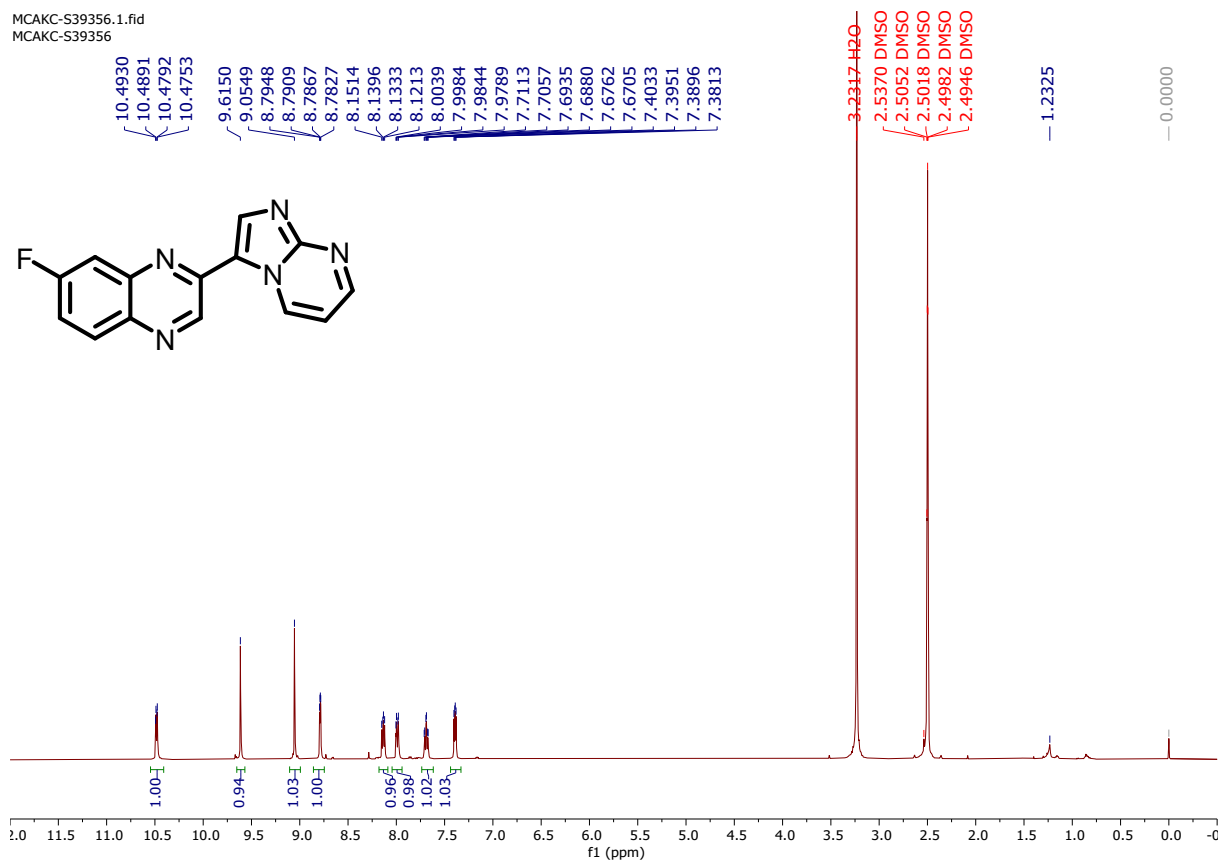

**Figure S23:**  $^1\text{H}$  NMR of 7-fluoro-2-(imidazo[1,2-a]pyrimidin-3-yl)quinoxaline (**10h**) in  $\text{DMSO-}d_6$  at 500 MHz

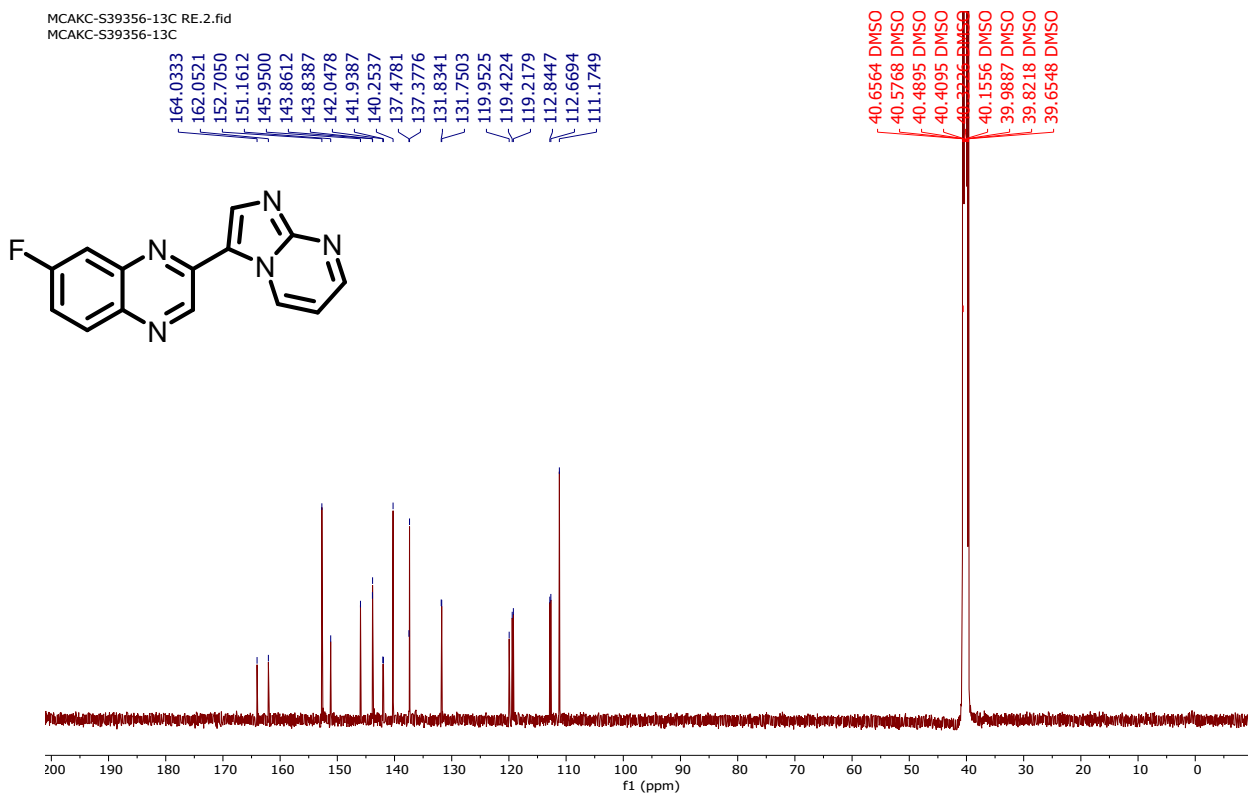

**Figure S24:**  $^{13}\text{C}$  NMR of 7-fluoro-2-(imidazo[1,2-a]pyrimidin-3-yl)quinoxaline (**10h**) in  $\text{DMSO-}d_6$  at 125 MHz

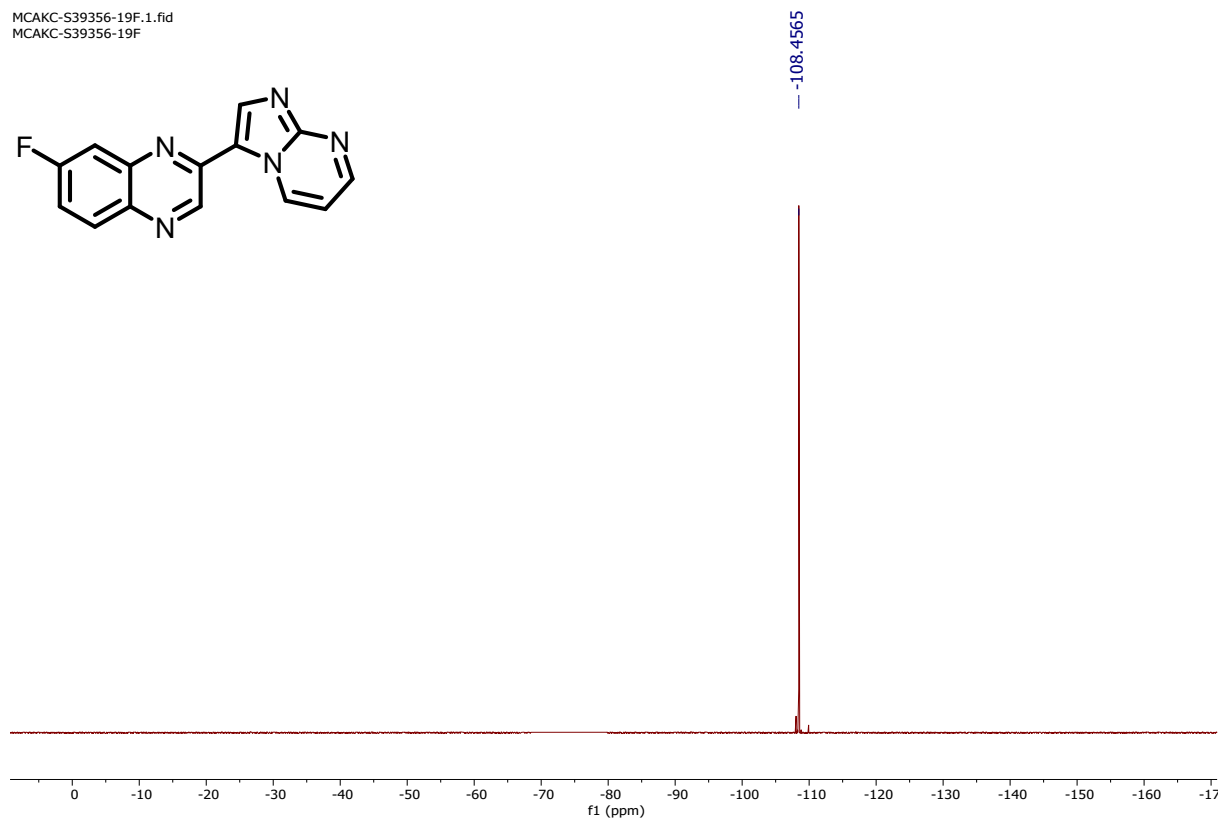

**Figure S25:**  $^{19}\text{F}$  NMR of 7-fluoro-2-(imidazo[1,2-a]pyrimidin-3-yl)quinoxaline (**10h**) in  $\text{DMSO-}d_6$  at 471 MHz

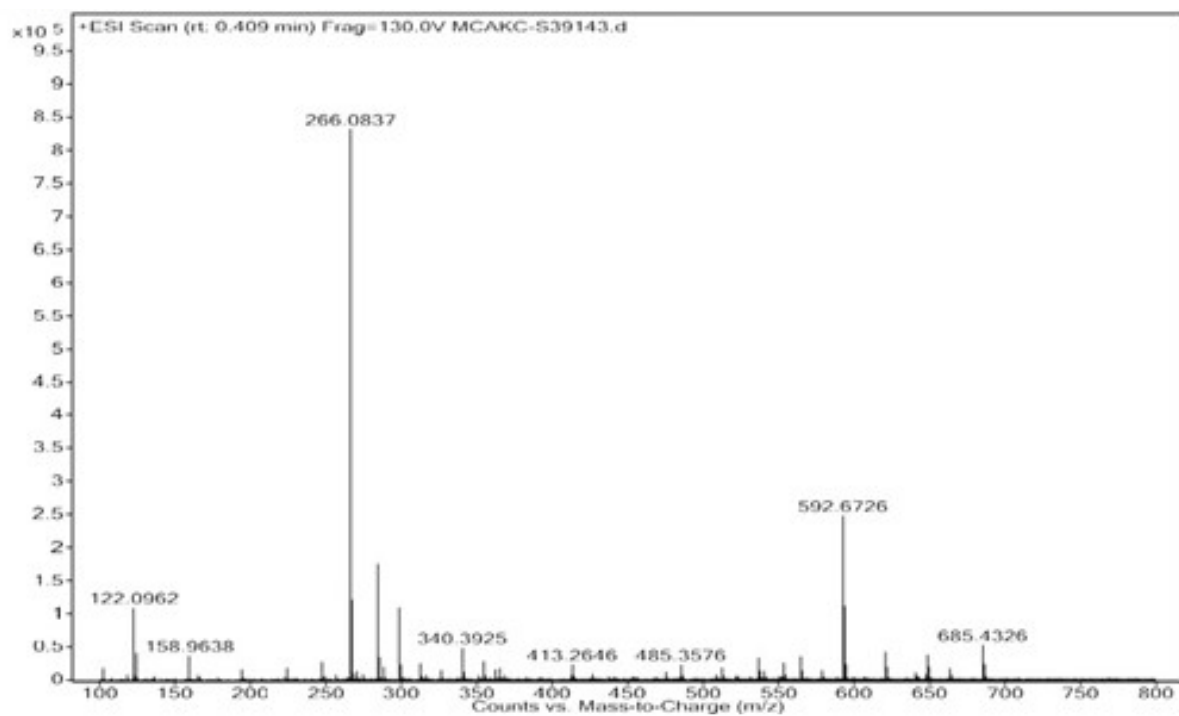

**Figure S26:** HRMS Spectra of 7-fluoro-2-(imidazo[1,2-a]pyrimidin-3-yl)quinoxaline (**10h**)

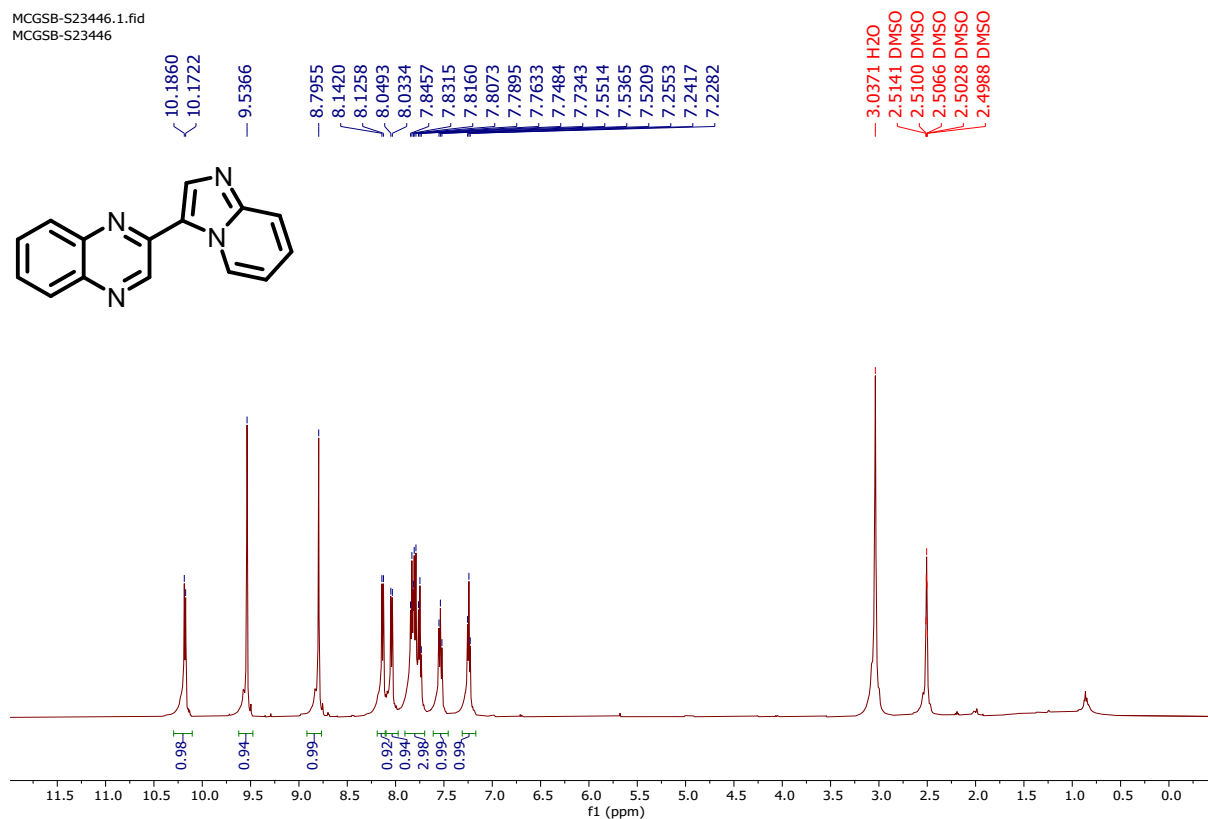

**Figure S27:** <sup>1</sup>H NMR of 2-(imidazo[1,2-a]pyridin-3-yl)quinoxaline (**10i**) in DMSO-*d*<sub>6</sub> at 500 MHz

MCGSB-S23446-13C.1.fid  
MCGSB-S23446-13C

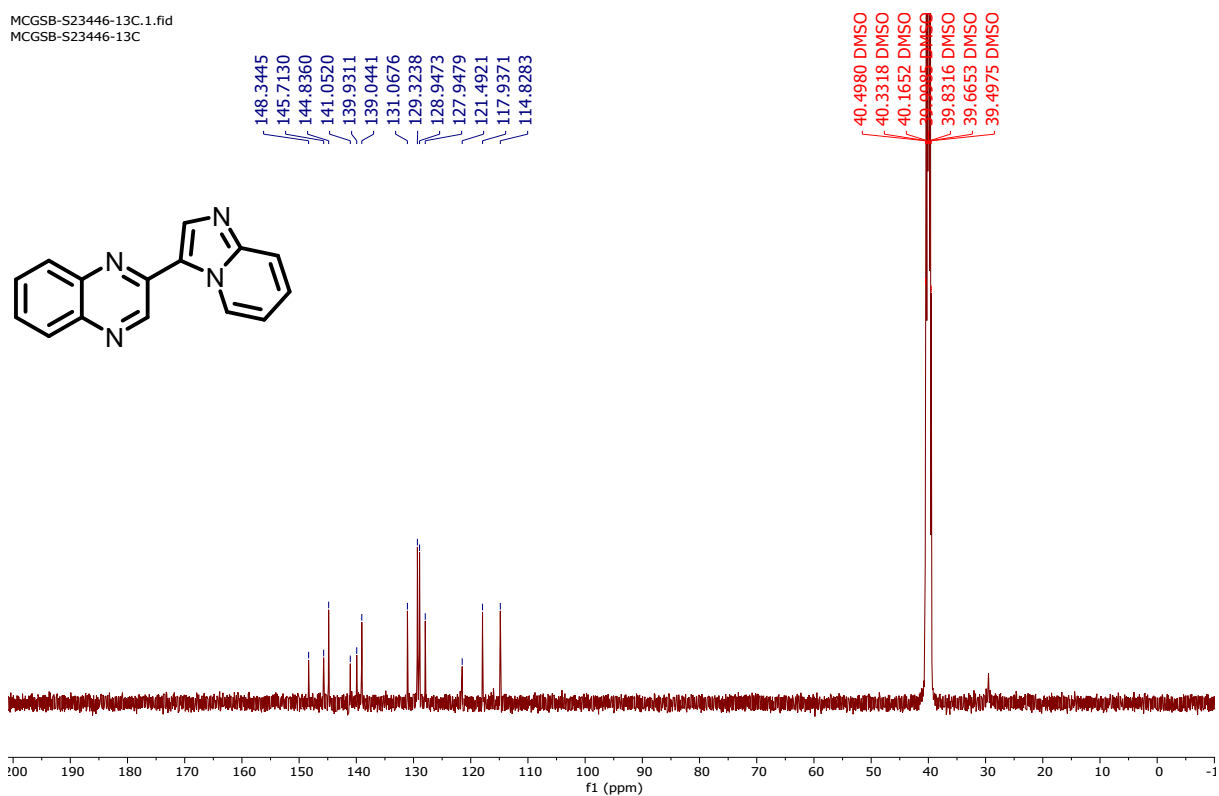

**Figure S28:** <sup>13</sup>C NMR of 2-(imidazo[1,2-a]pyridin-3-yl)quinoxaline (10i) in DMSO-*d*<sub>6</sub> at 125 MHz

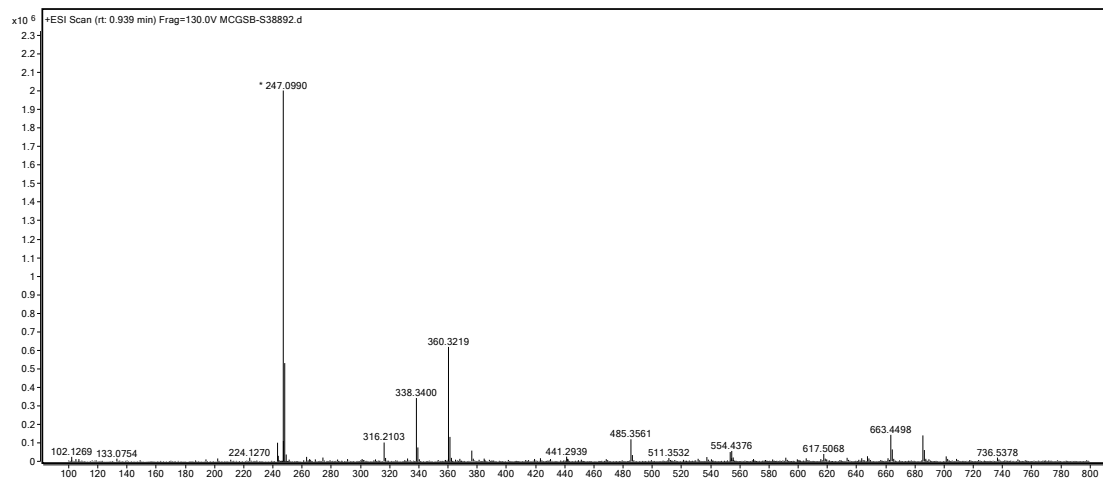

**Figure S29:** HRMS spectra of 2-(imidazo[1,2-a]pyridin-3-yl)quinoxaline (10i)

MCAKC-S26400.111.fid  
MCAKC-S26400

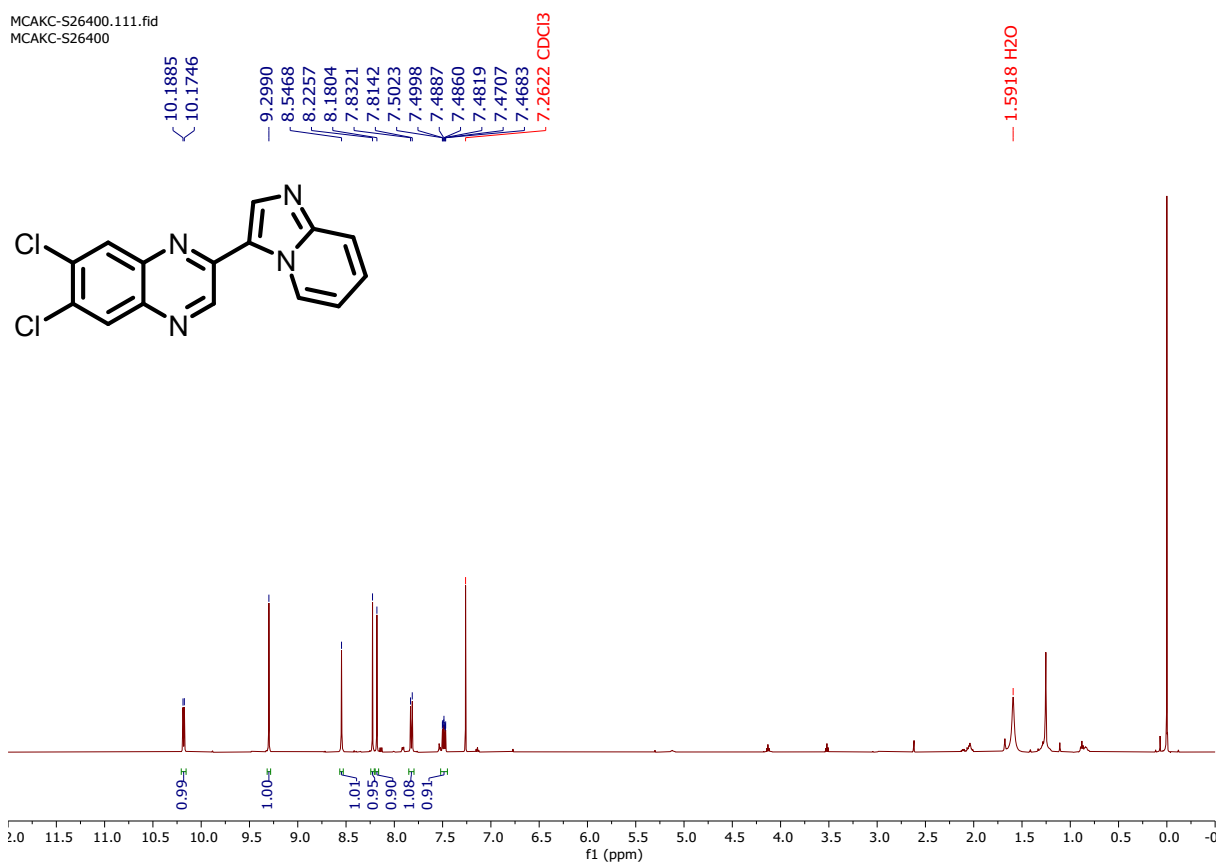

**Figure S30:** <sup>1</sup>H NMR of 6,7-dichloro-2-(imidazo[1,2-a]pyridin-3-yl)quinoxaline (10j) in CDCl<sub>3</sub> at 500 MHz

MCAKC-S26400 13C.1.fid  
MCAKC-S26400 13C

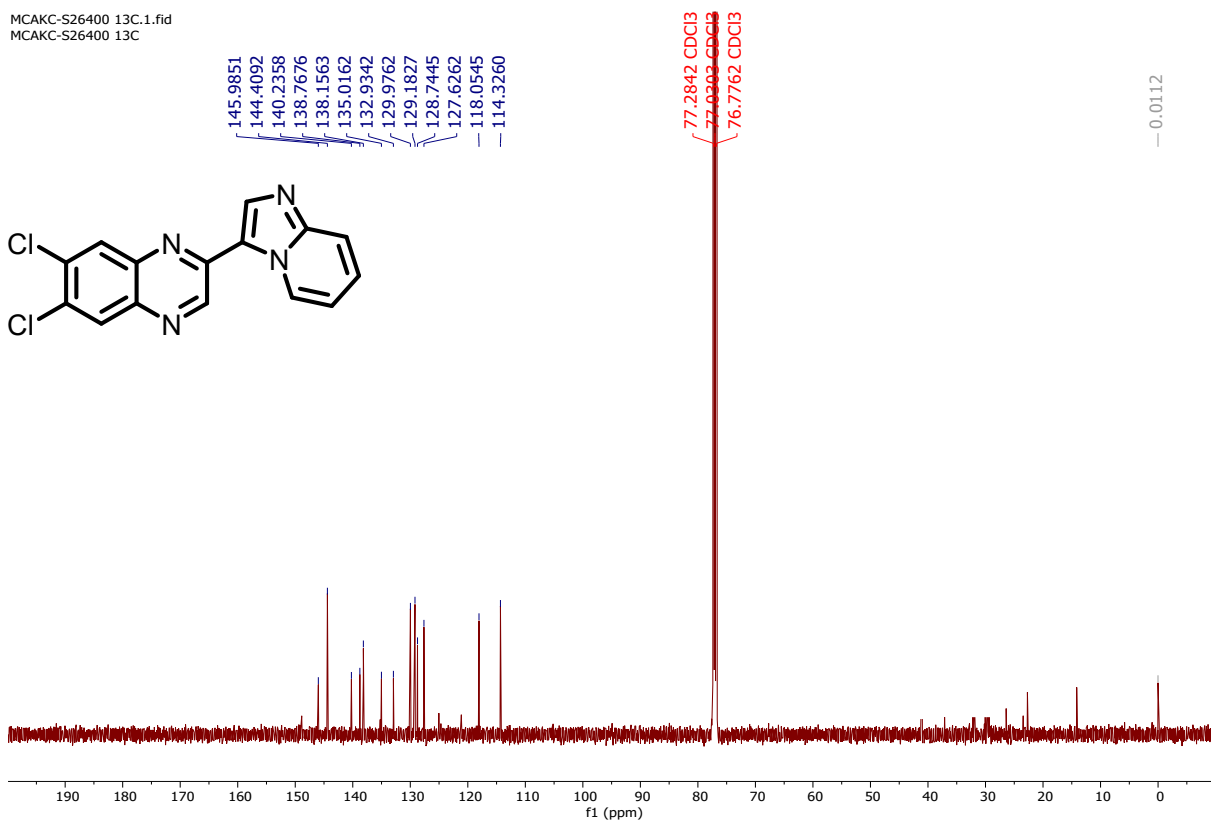

**Figure S31:** <sup>13</sup>C NMR of 6,7-dichloro-2-(imidazo[1,2-a]pyridin-3-yl)quinoxaline (10j) in CDCl<sub>3</sub> at 125 MHz



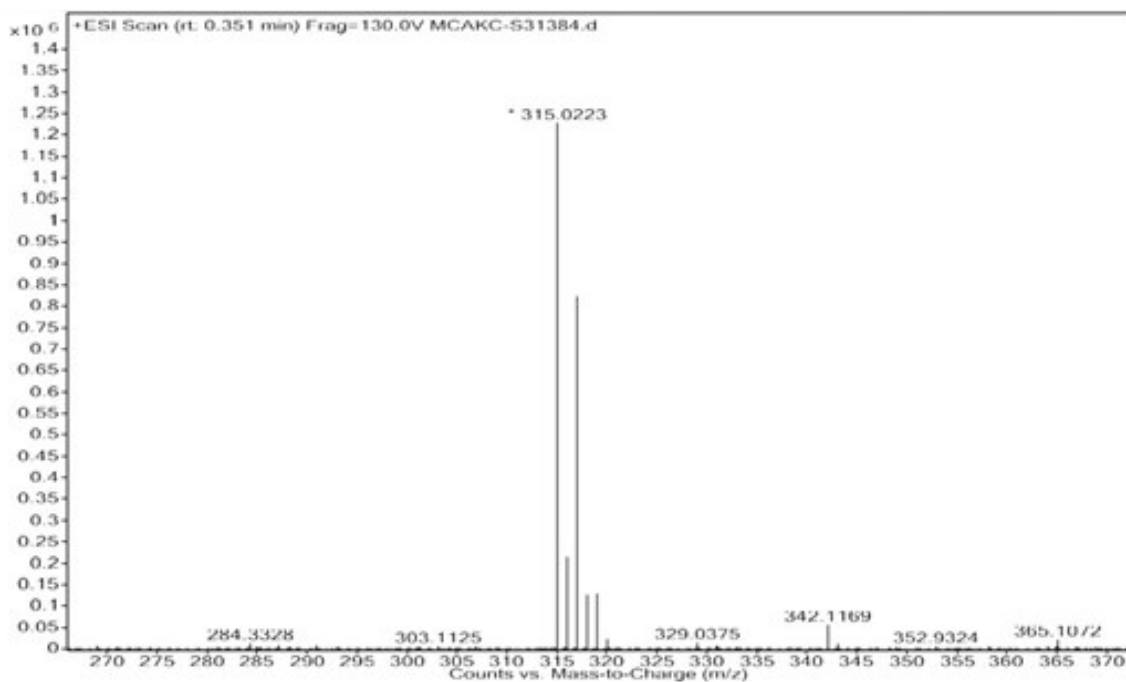

**Figure S32:** HRMS spectra of 6,7-dichloro-2-(imidazo[1,2-a]pyridin-3-yl)quinoxaline (**10j**)

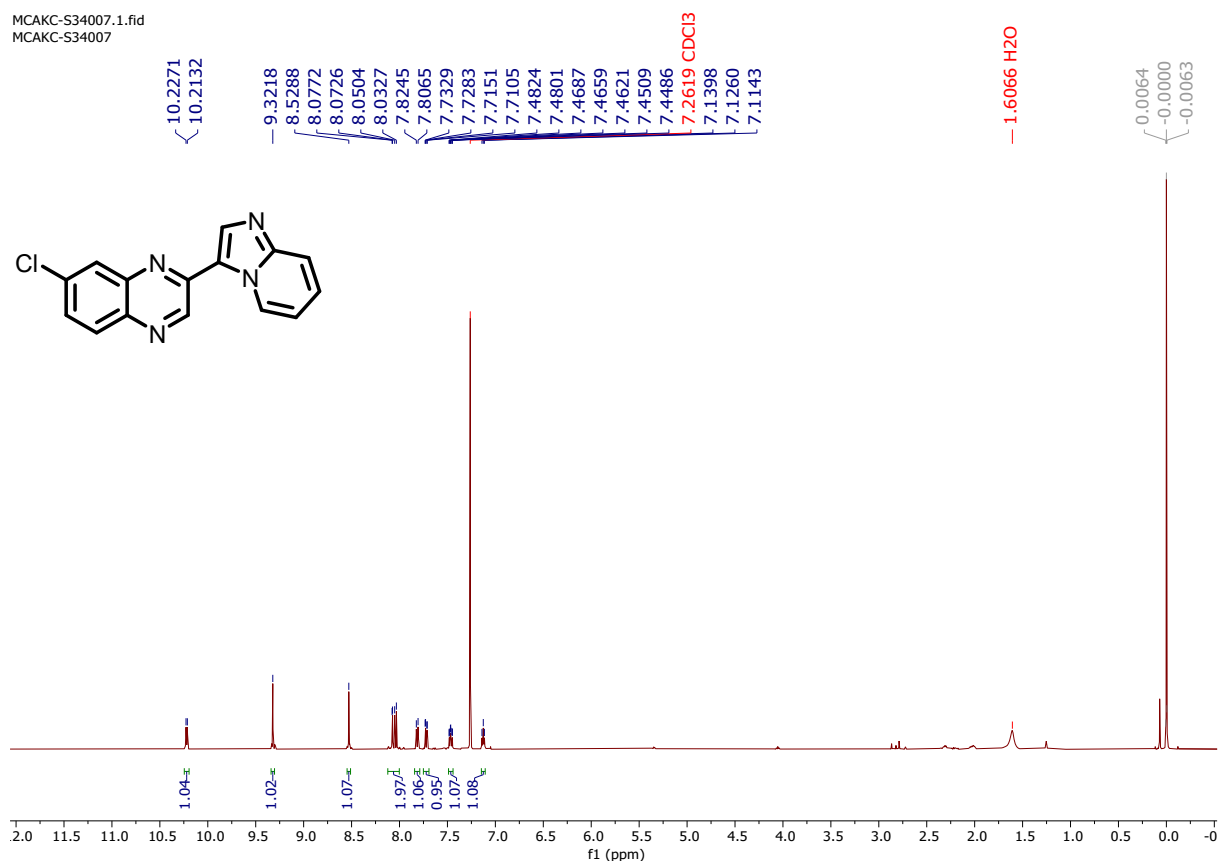

**Figure S33:** <sup>1</sup>H NMR of 7-chloro-2-(imidazo[1,2-a]pyridin-3-yl)quinoxaline (**10k**) in CDCl<sub>3</sub> at 500 MHz

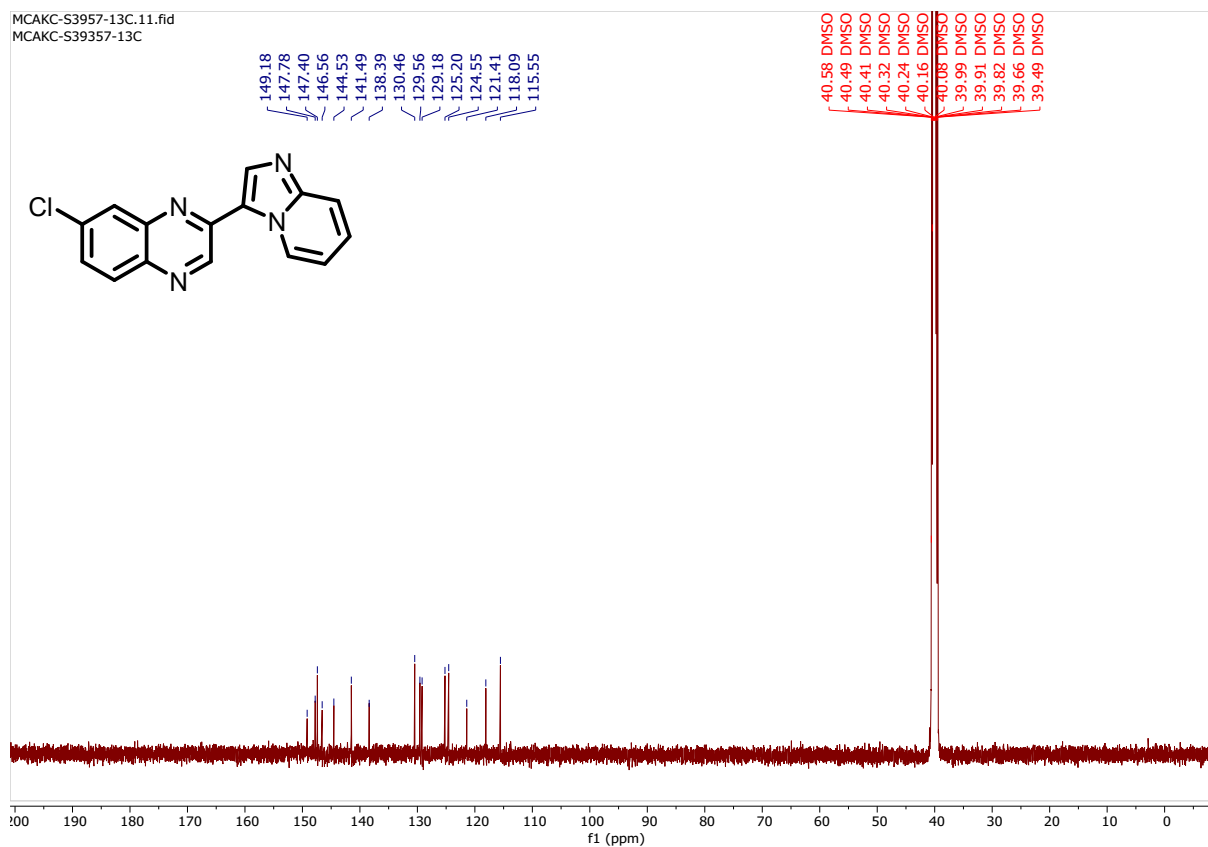

**Figure S34:**  $^{13}\text{C}$  NMR of 7-chloro-2-(imidazo[1,2-a]pyridin-3-yl)quinoxaline (10k) in  $\text{CDCl}_3$  at 125 MHz

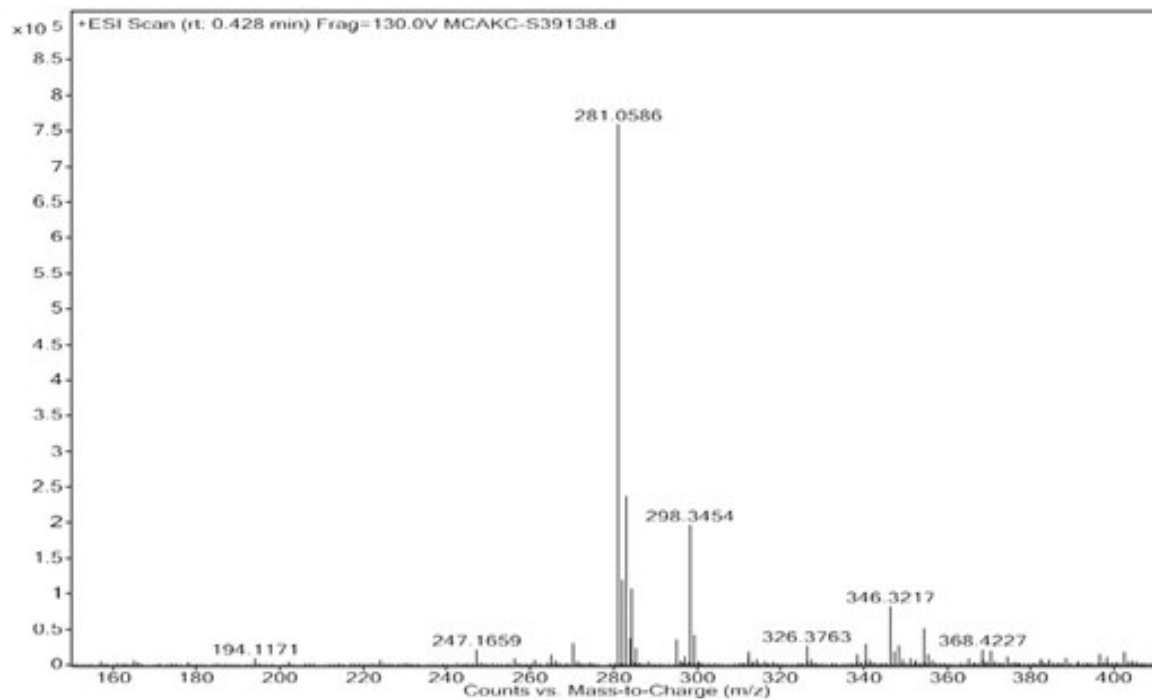

**Figure S35:** HRMS spectra of 7-chloro-2-(imidazo[1,2-a]pyridin-3-yl)quinoxaline (10k)

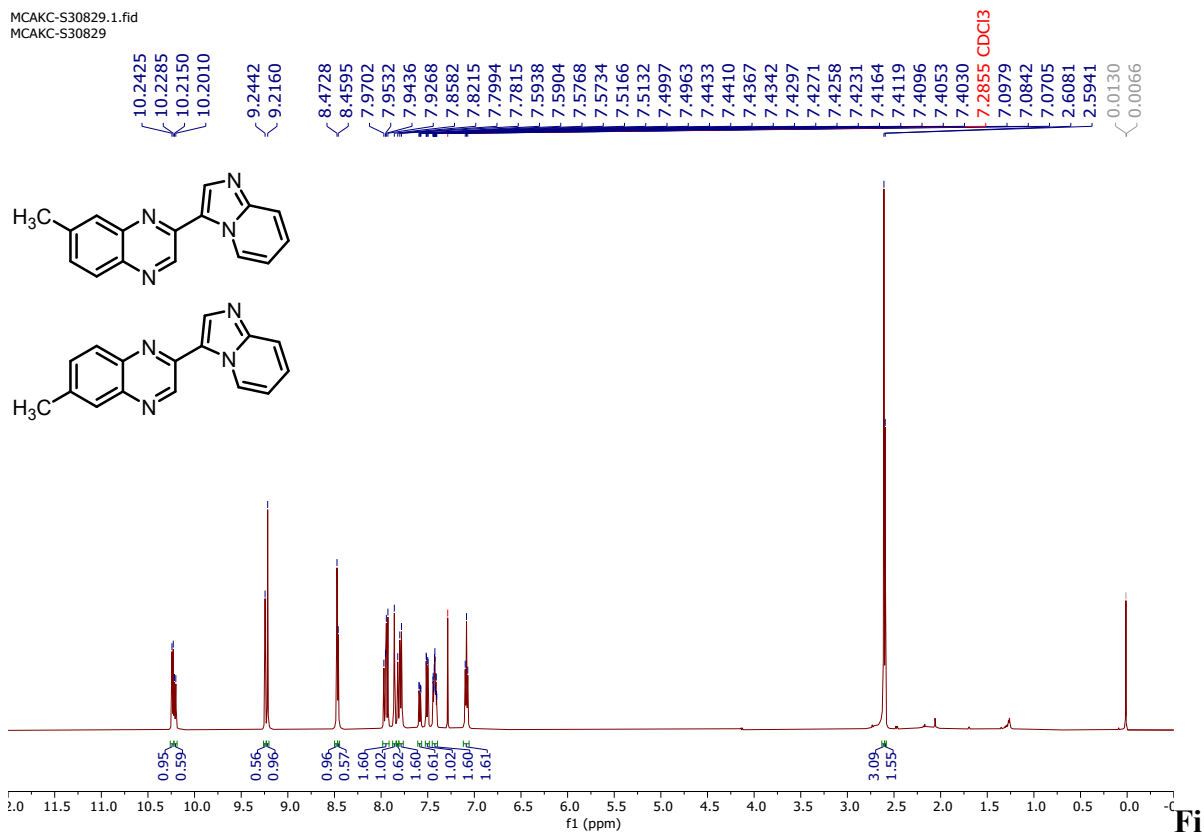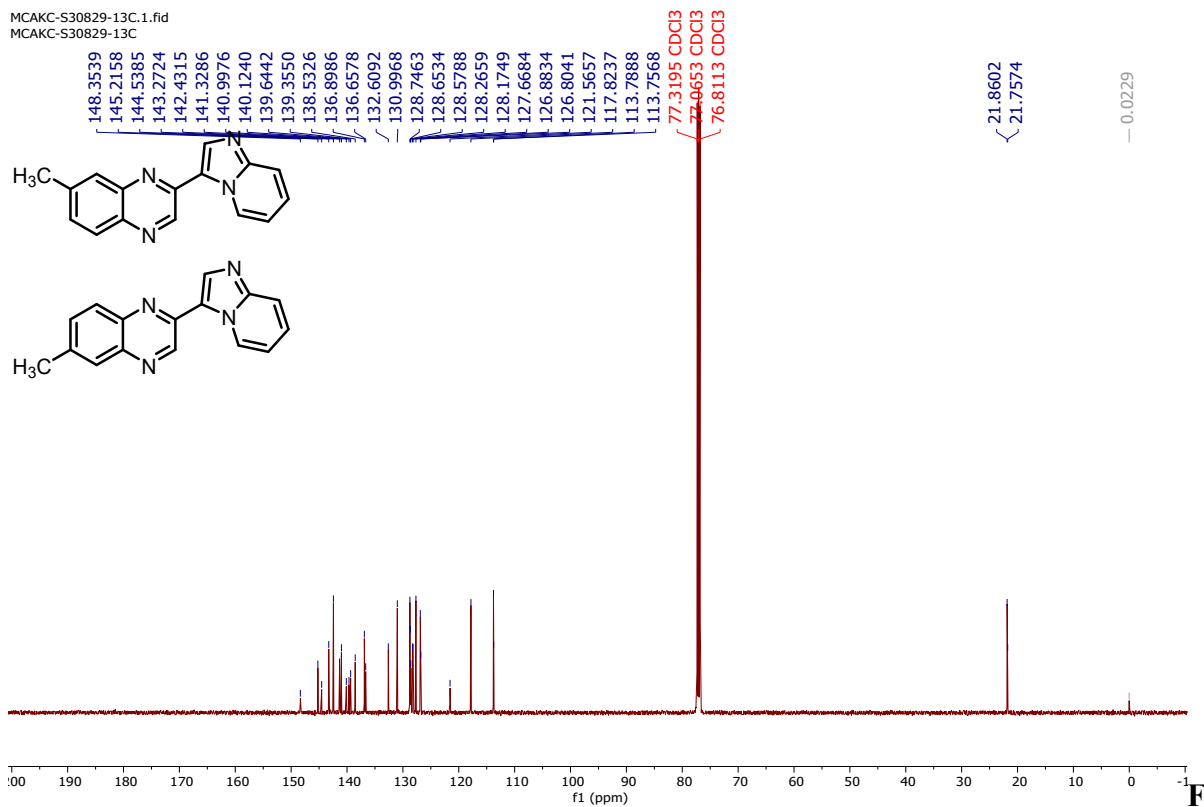

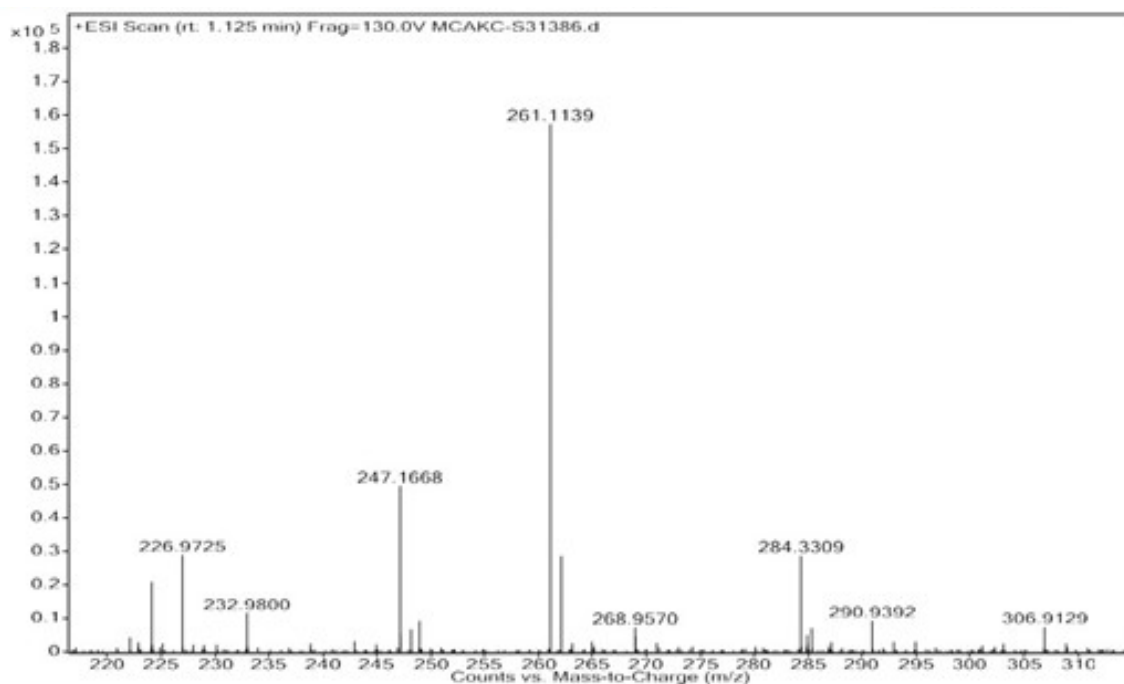

**Figure S38:** HRMS spectra of 6-methyl-2-(imidazo[1,2-a]pyridin-3-yl)quinoxaline & 7-methyl-2-(imidazo[1,2-a]pyridin-3-yl)quinoxaline (10l)

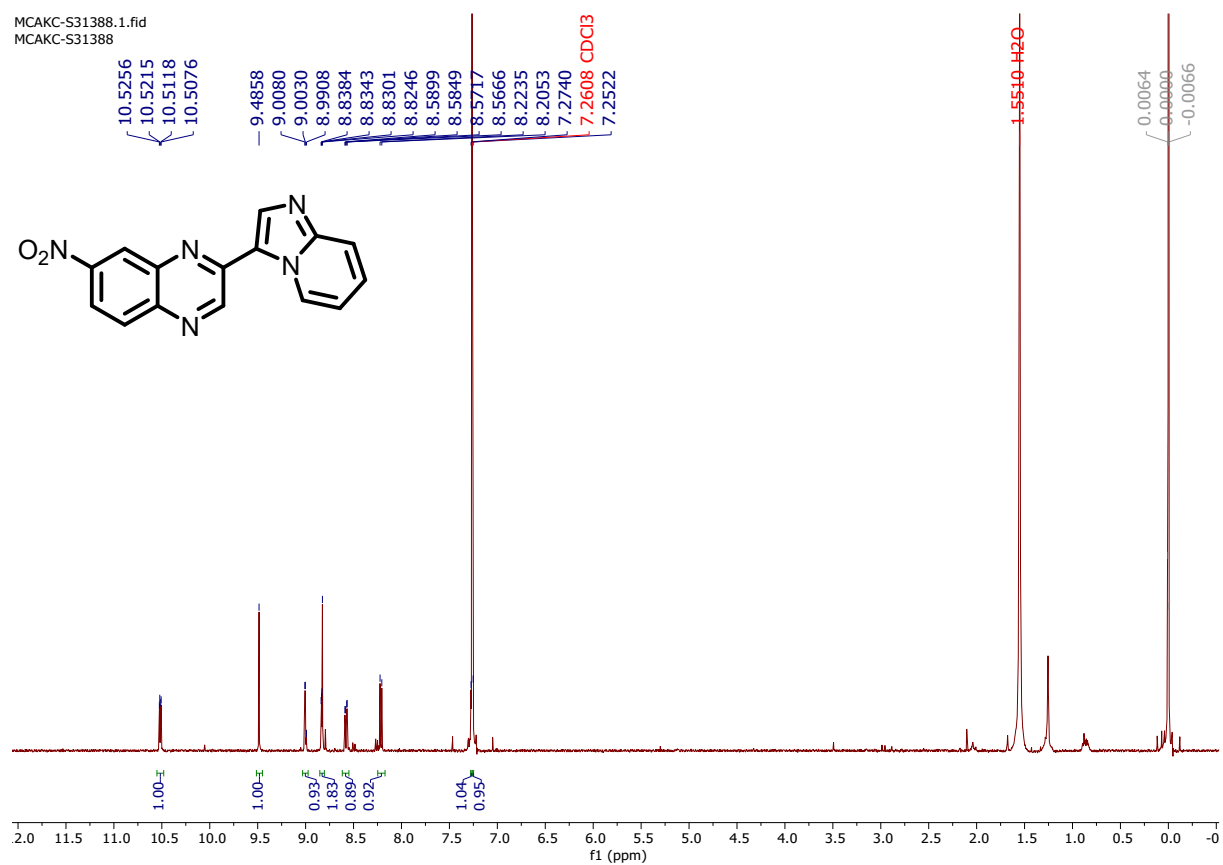

**Figure S39:** <sup>1</sup>H NMR of 7-nitro-2-(imidazo[1,2-a]pyridin-3-yl)quinoxaline (10m) in CDCl<sub>3</sub> at 500 MHz

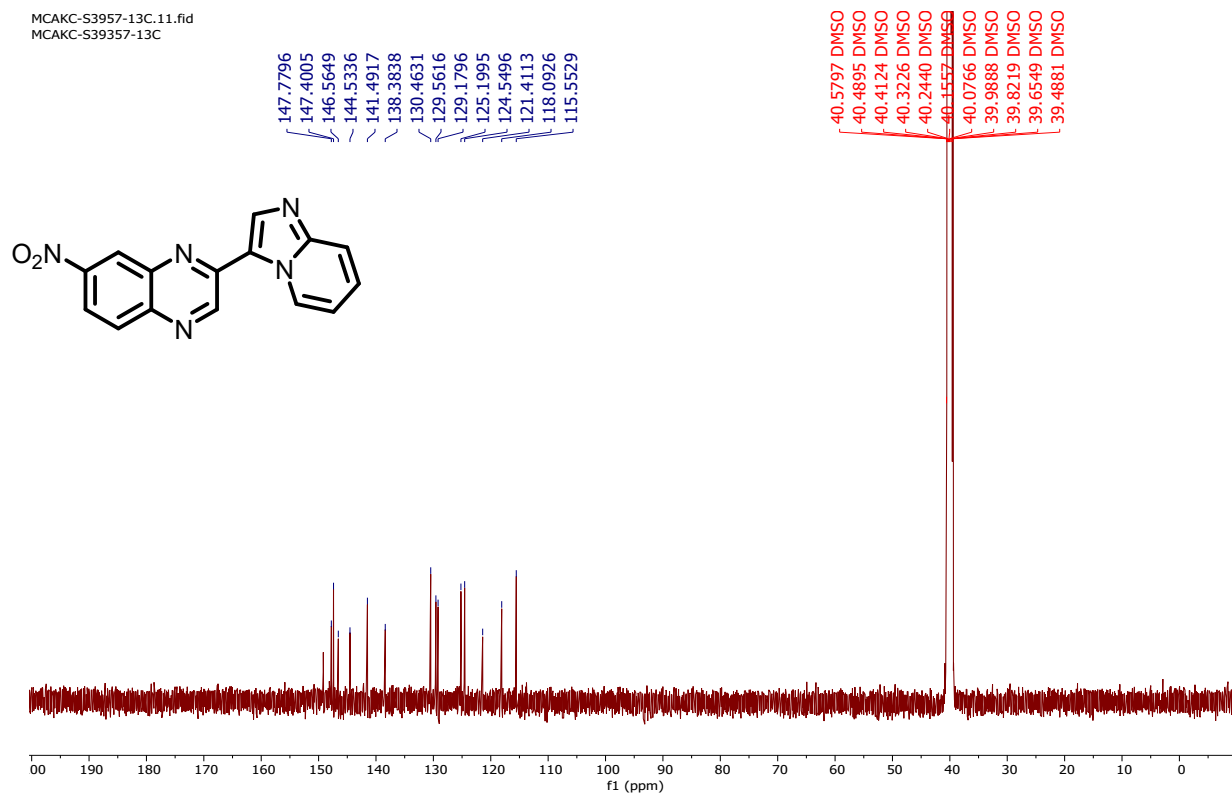

**Figure S40:**  $^{13}\text{C}$  NMR of 7-nitro-2-(imidazo[1,2-a]pyridin-3-yl)quinoxaline (**10m**) in  $\text{DMSO-}d_6$  at 125 MHz

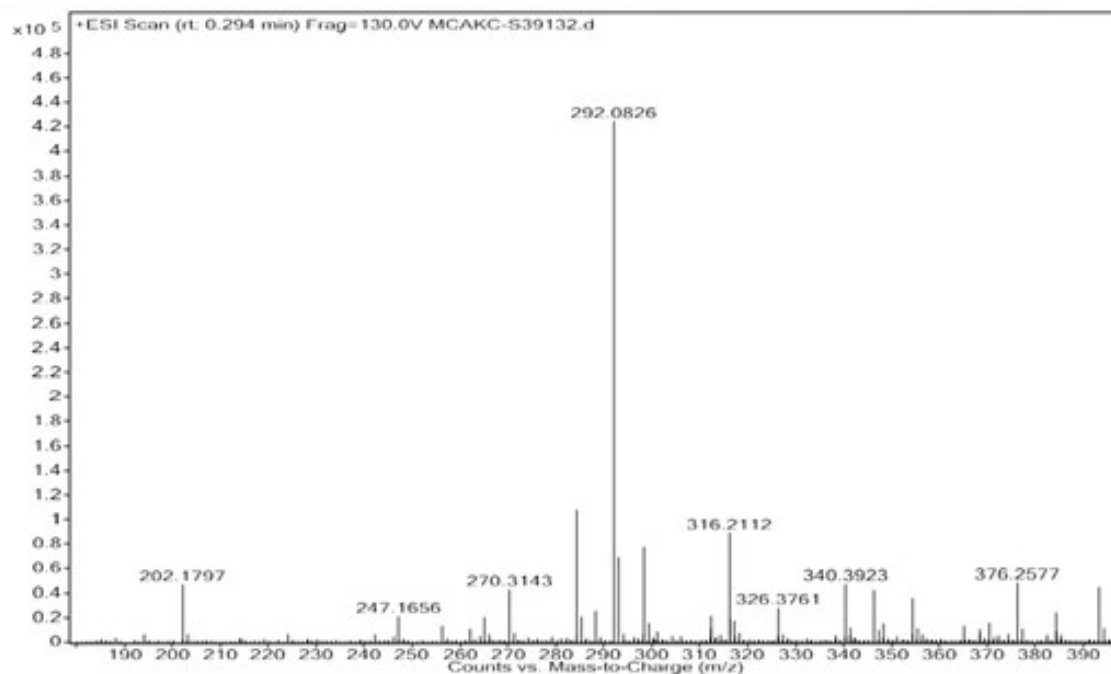

**Figure S41:** HRMS spectra of 7-nitro-2-(imidazo[1,2-a]pyridin-3-yl)quinoxaline (**10m**)

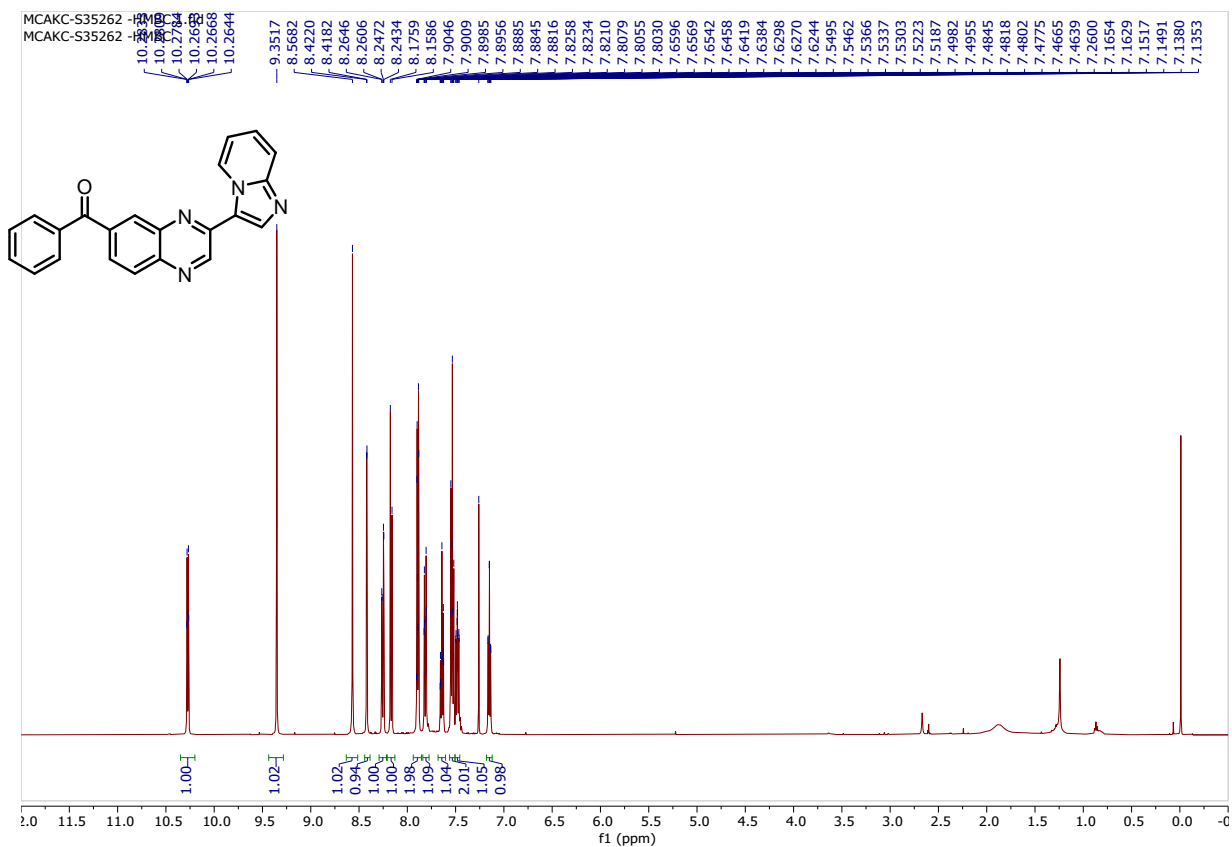

**Figure S42:** <sup>1</sup>H NMR of 7-phenoxy-2-(imidazo[1,2-a]pyridin-3-yl) quinoxaline (10n) in CDCl<sub>3</sub> at 500 MHz

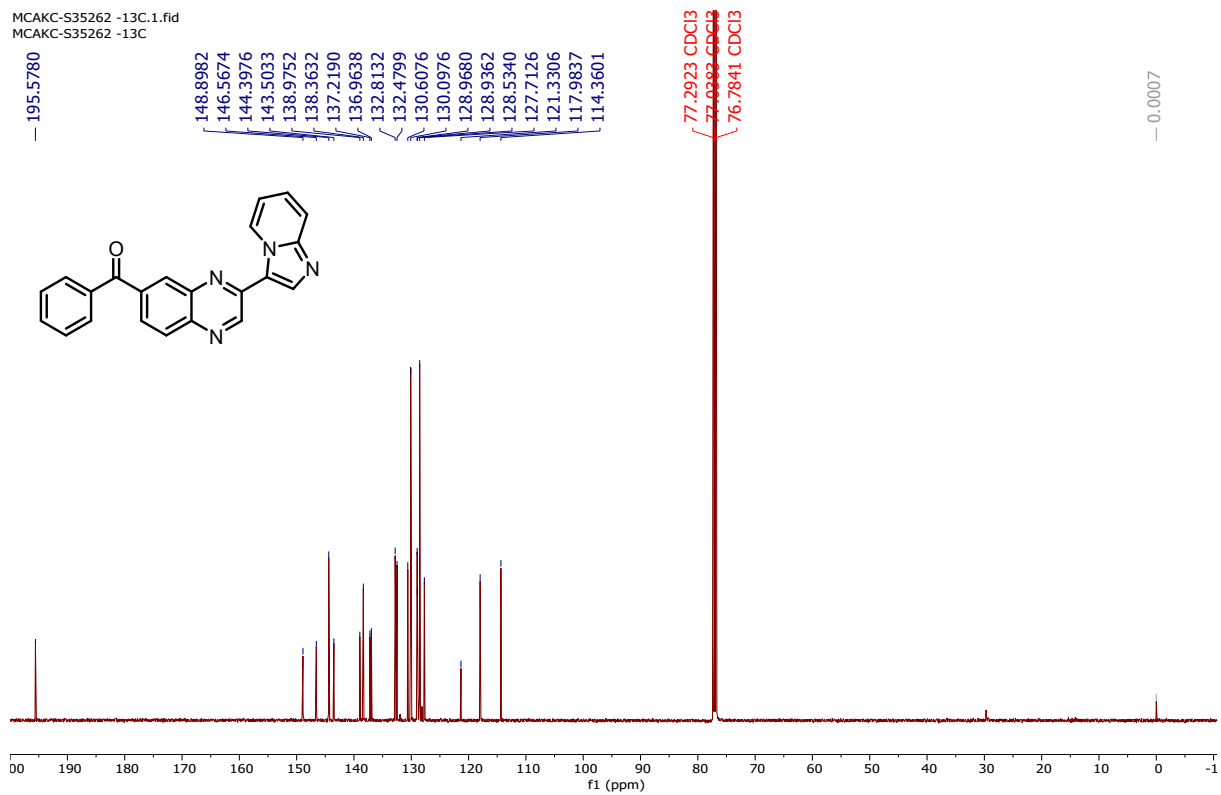

**Figure S43:** <sup>13</sup>C NMR of 7-phenoxy-2-(imidazo[1,2-a]pyridin-3-yl) quinoxaline (10n) in CDCl<sub>3</sub> at 125 MHz

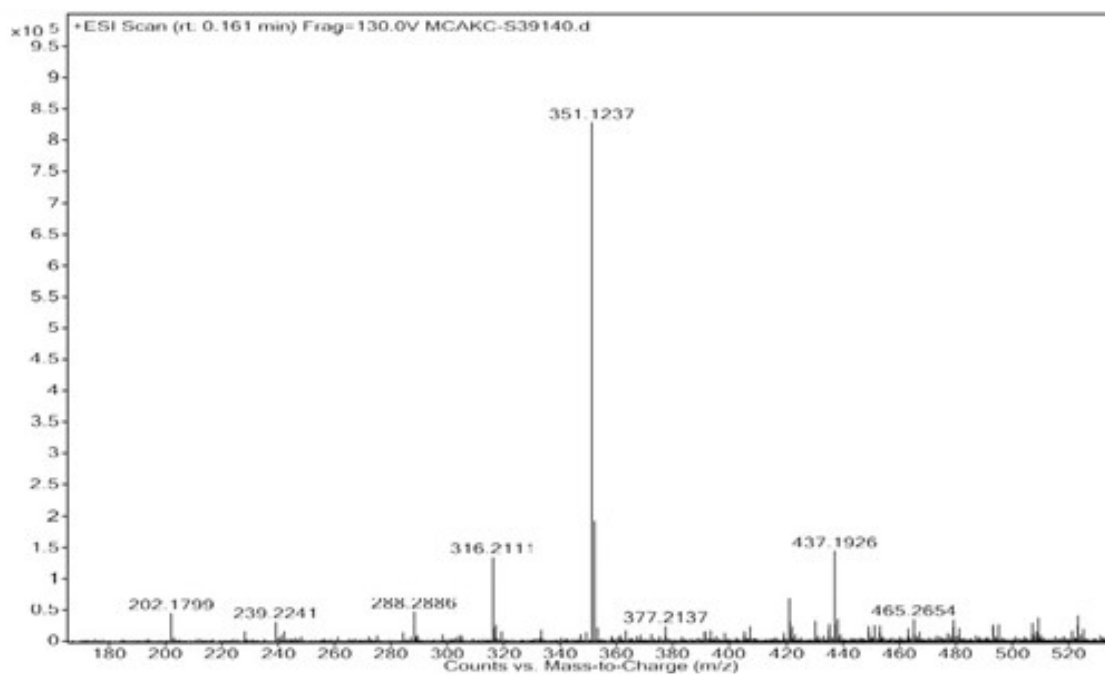

Figure S44: HRMS spectra of 7-phenoxy-2-(imidazo[1,2-a]pyridin-3-yl) quinoxaline (**10n**)

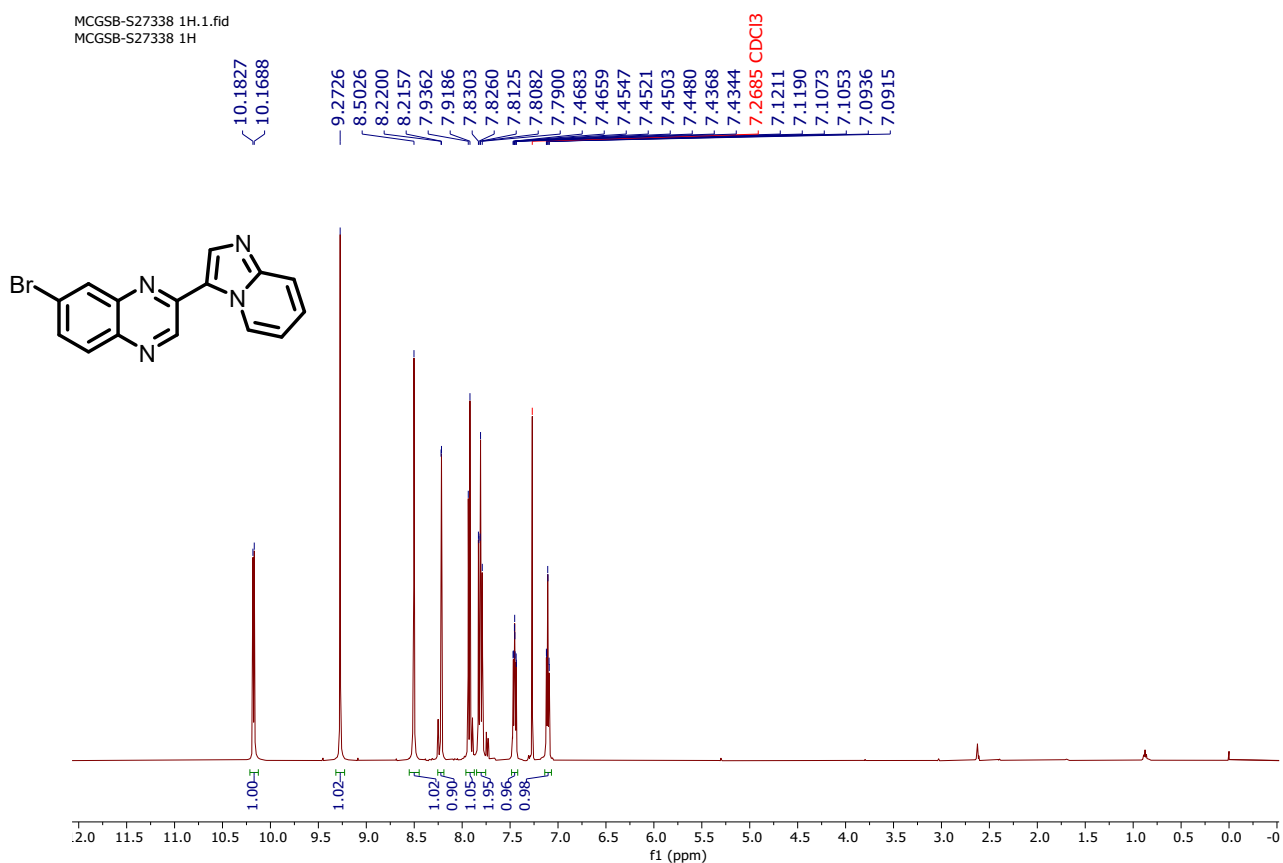

Figure S45: <sup>1</sup>H NMR of 7-bromo-2-(imidazo[1,2-a]pyridin-3-yl)quinoxaline (**10o**) in CDCl<sub>3</sub> at 500 MHz



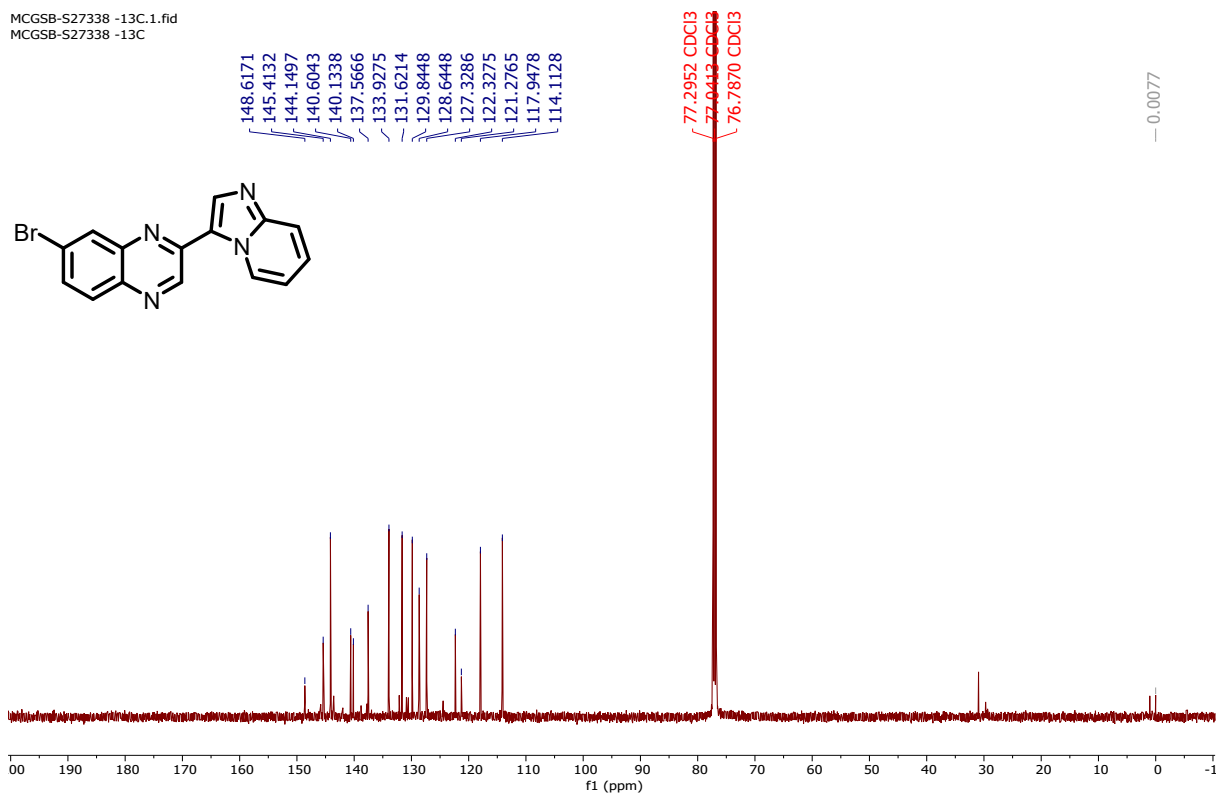

**Figure S46:**  $^{13}\text{C}$  NMR of 7-bromo-2-(imidazo[1,2-a]pyridin-3-yl)quinoxaline (**10o**) in  $\text{CDCl}_3$  at 125 MHz

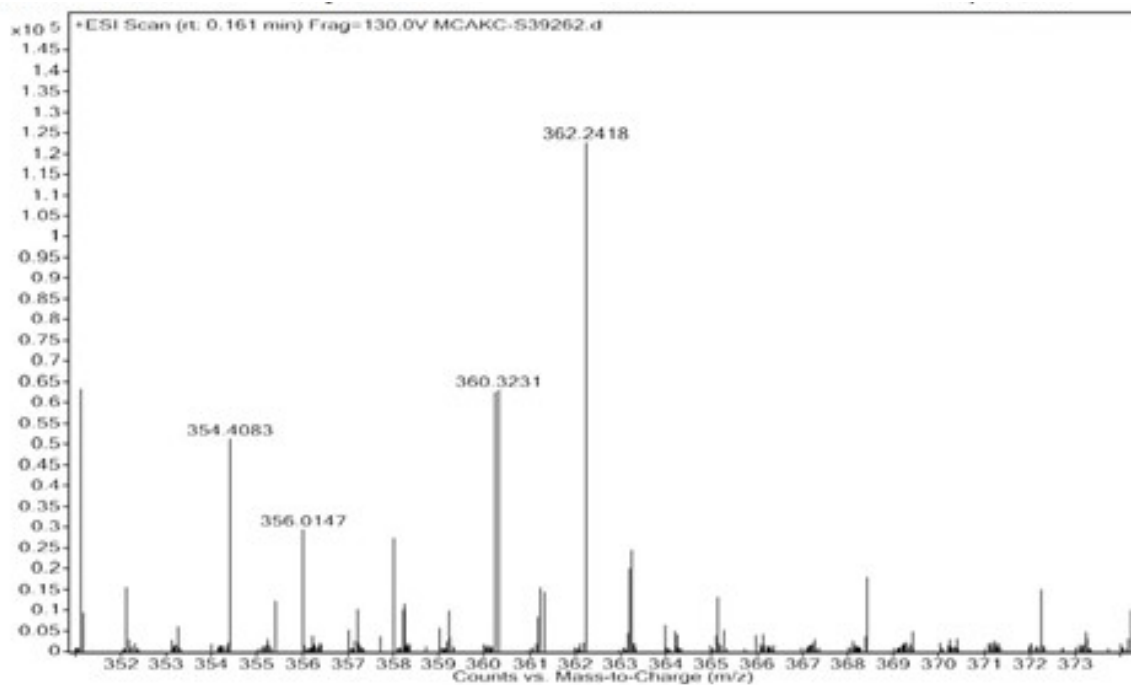

**Figure S47:** HRMS spectra of 7-bromo-2-(imidazo[1,2-a]pyridin-3-yl)quinoxaline (**10o**)

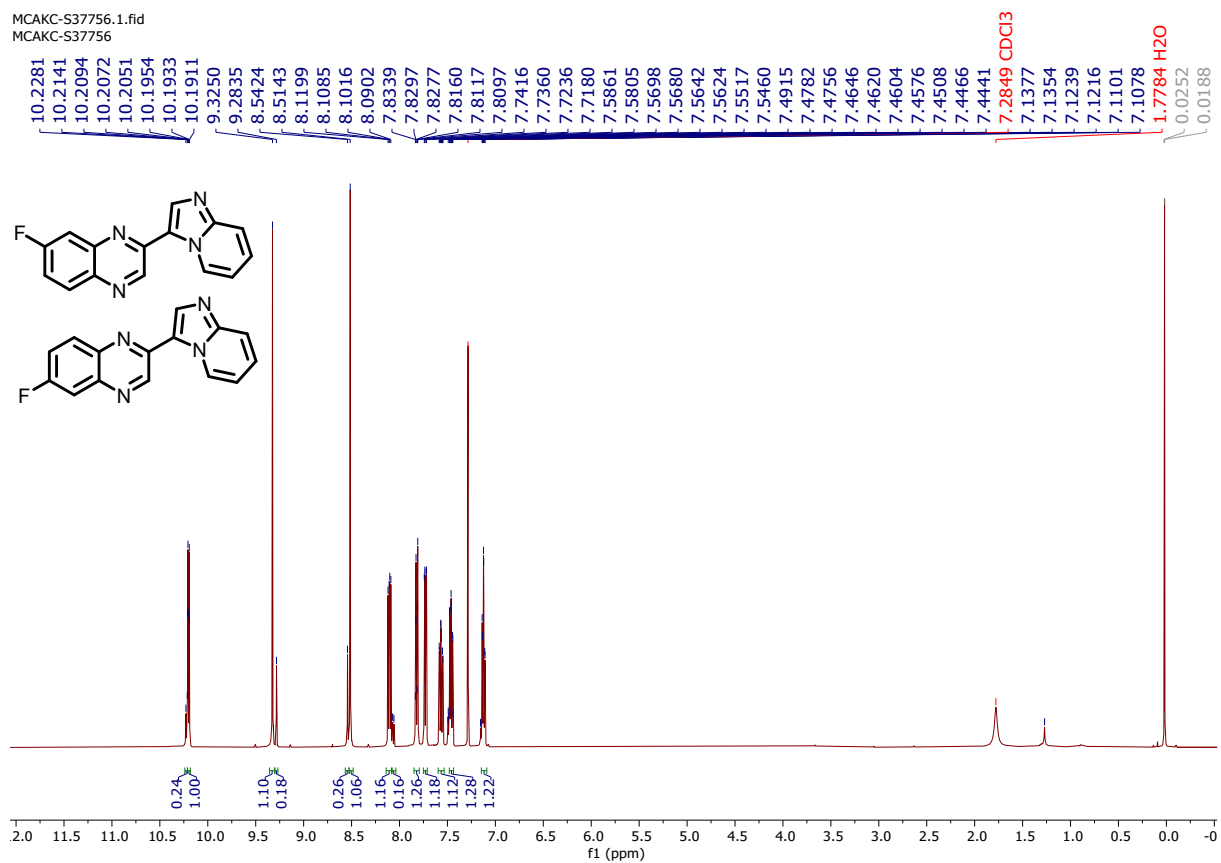

**Figure S48:**  $^1\text{H}$  NMR of 6-fluoro-2-(imidazo[1,2-a]pyridin-3-yl)quinoxaline & 7-fluoro-2-(imidazo[1,2-a]pyridin-3-yl)quinoxaline (**10p**) in  $\text{CDCl}_3$  at 500 MHz

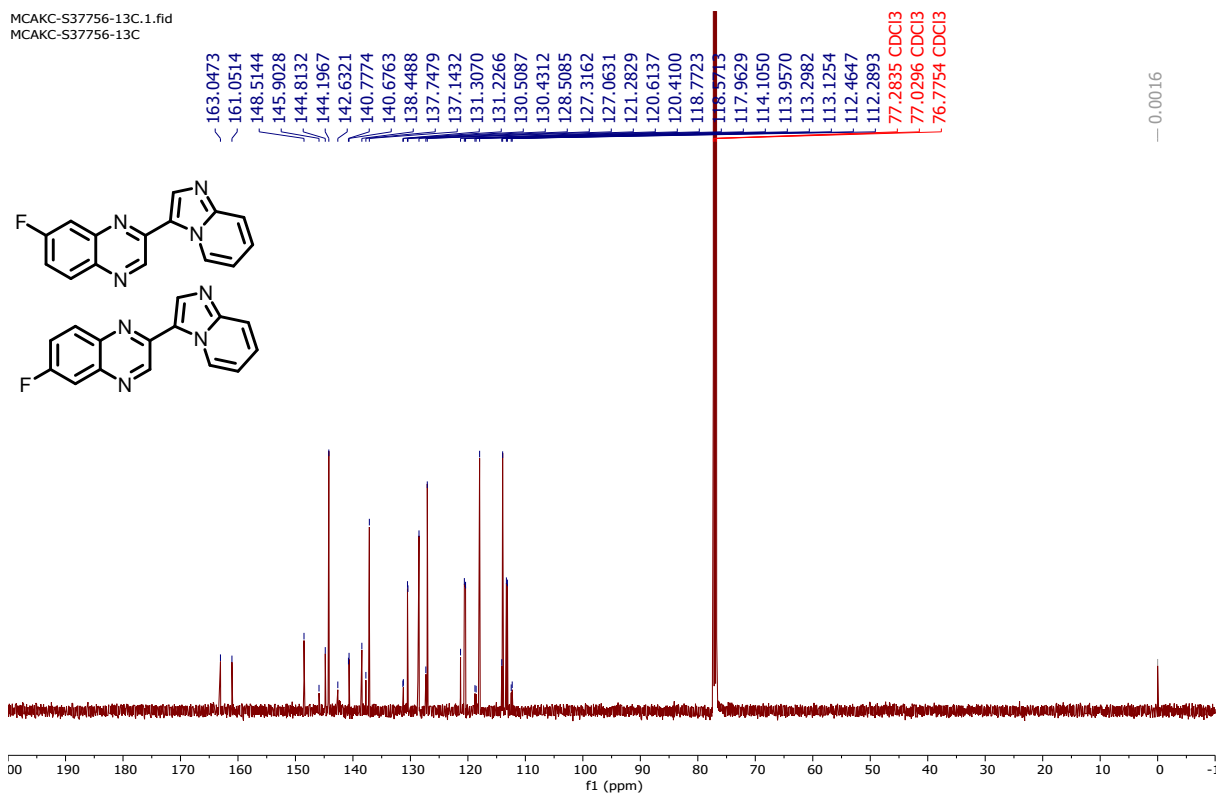

**Figure S49:**  $^{13}\text{C}$  NMR of 6-fluoro-2-(imidazo[1,2-a]pyridin-3-yl)quinoxaline & 7-fluoro-2-(imidazo[1,2-a]pyridin-3-yl)quinoxaline (**10p**) in  $\text{CDCl}_3$  at 125 MHz

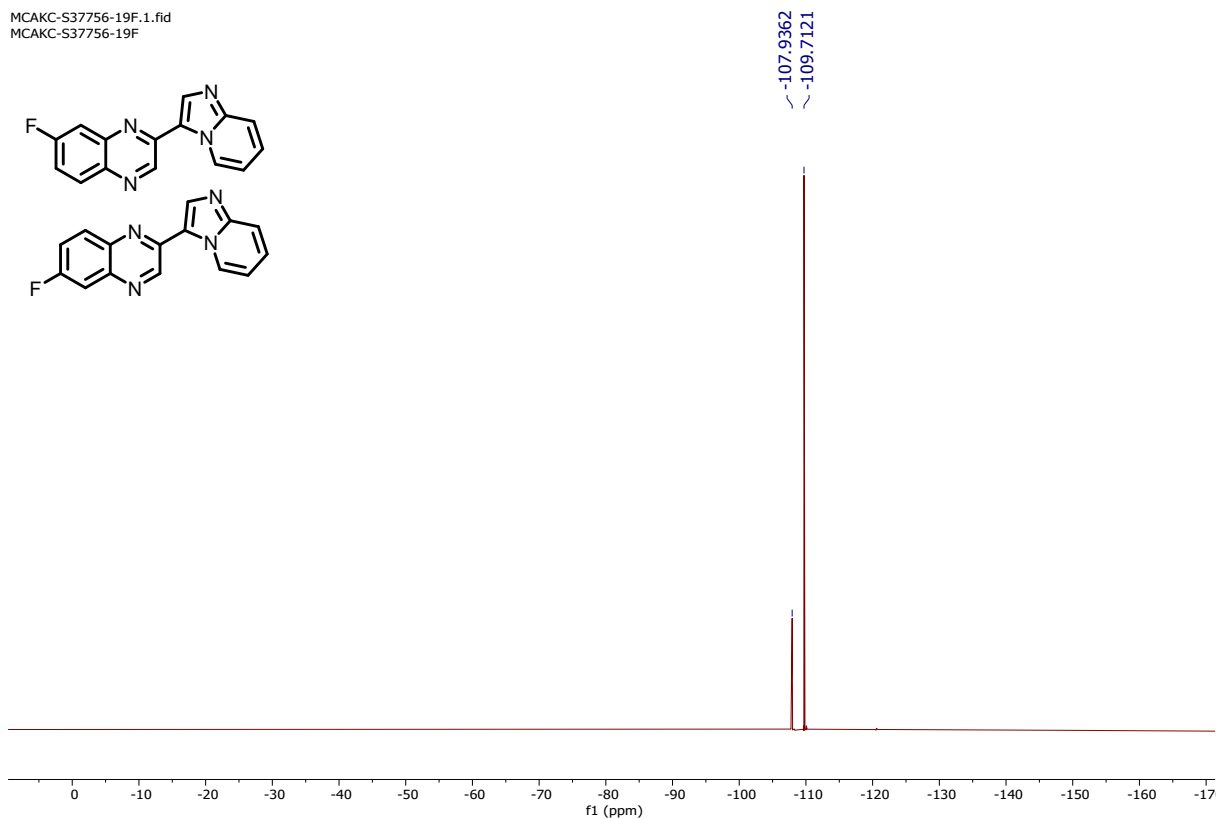

**Figure S50:**  $^{19}\text{F}$  NMR of 6-fluoro-2-(imidazo[1,2-a]pyridin-3-yl)quinoxaline & 7-fluoro-2-(imidazo[1,2-a]pyridin-3-yl)quinoxaline (**10p**) in  $\text{DMSO}-d_6$  at 471 MHz

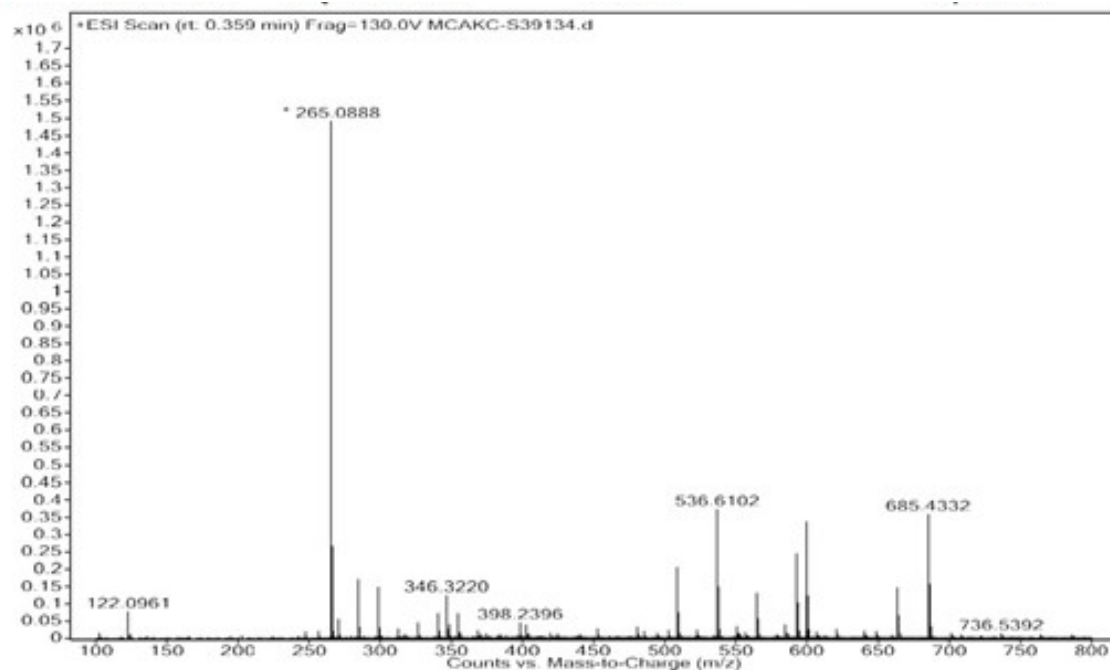

**Figure S51:** HRMS spectra of 6-fluoro-2-(imidazo[1,2-a]pyridin-3-yl)quinoxaline & 7-fluoro-2-(imidazo[1,2-a]pyridin-3-yl)quinoxaline (**10p**)

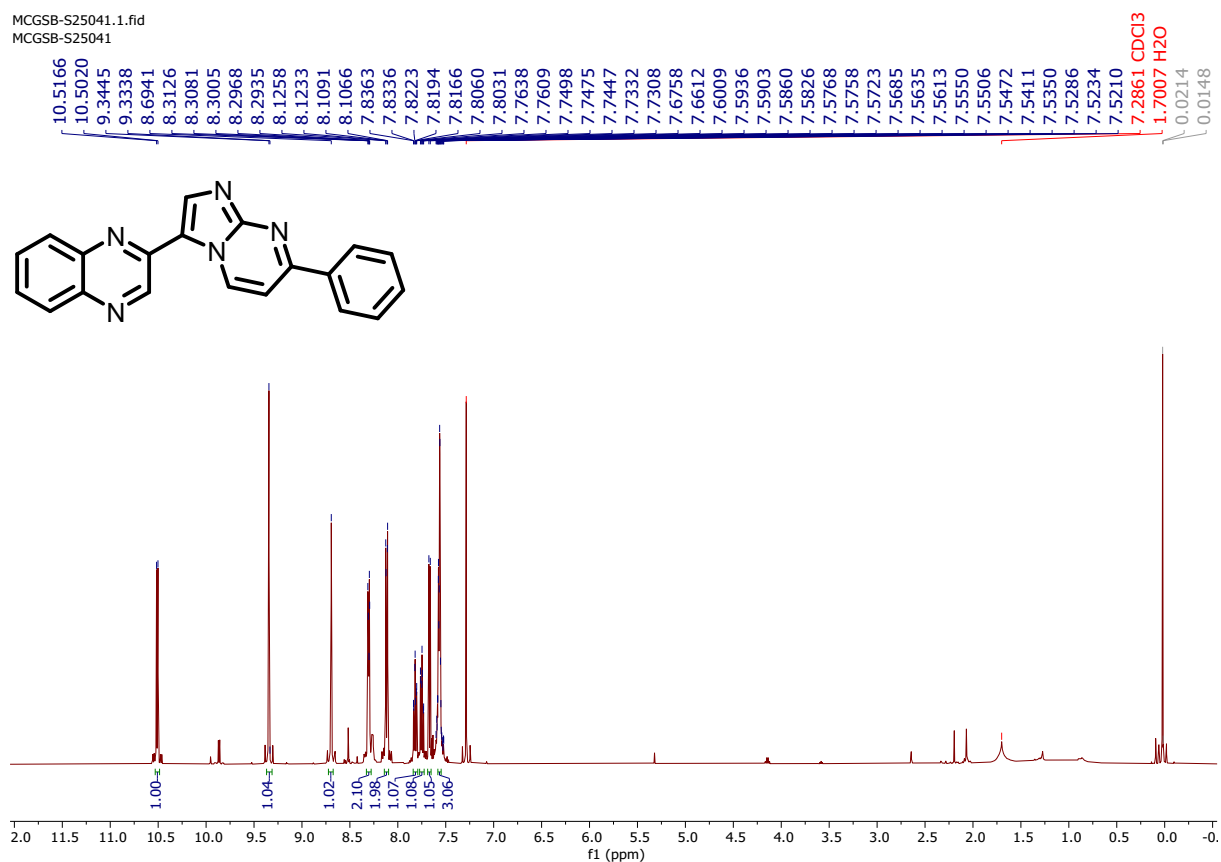

**Figure S52:**  $^1\text{H}$  NMR of 2-(7-phenylimidazo[1,2-a]pyrimidin-3-yl)quinoxaline (**12a**) in  $\text{CDCl}_3$  at 500 MHz

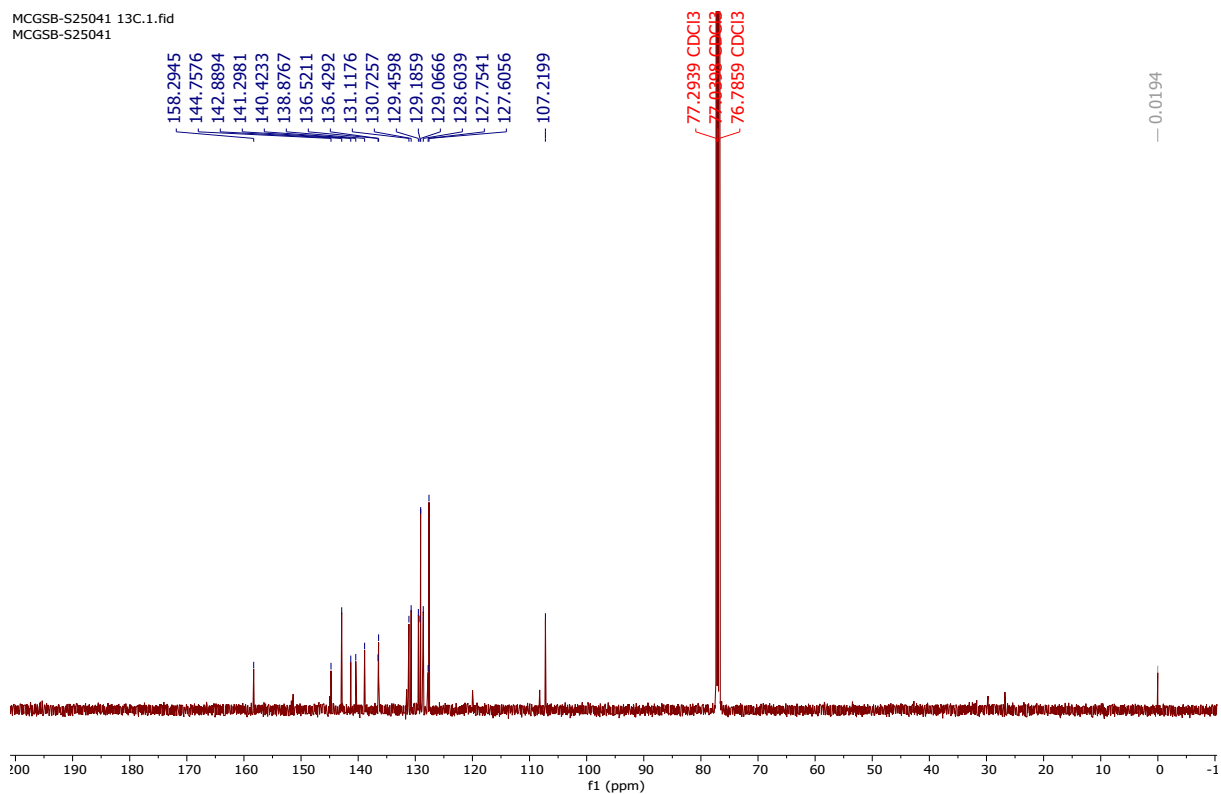

**Figure S53:**  $^{13}\text{C}$  NMR of 2-(7-phenylimidazo[1,2-a]pyrimidin-3-yl)quinoxaline (**12a**) in  $\text{CDCl}_3$  at 125 MHz

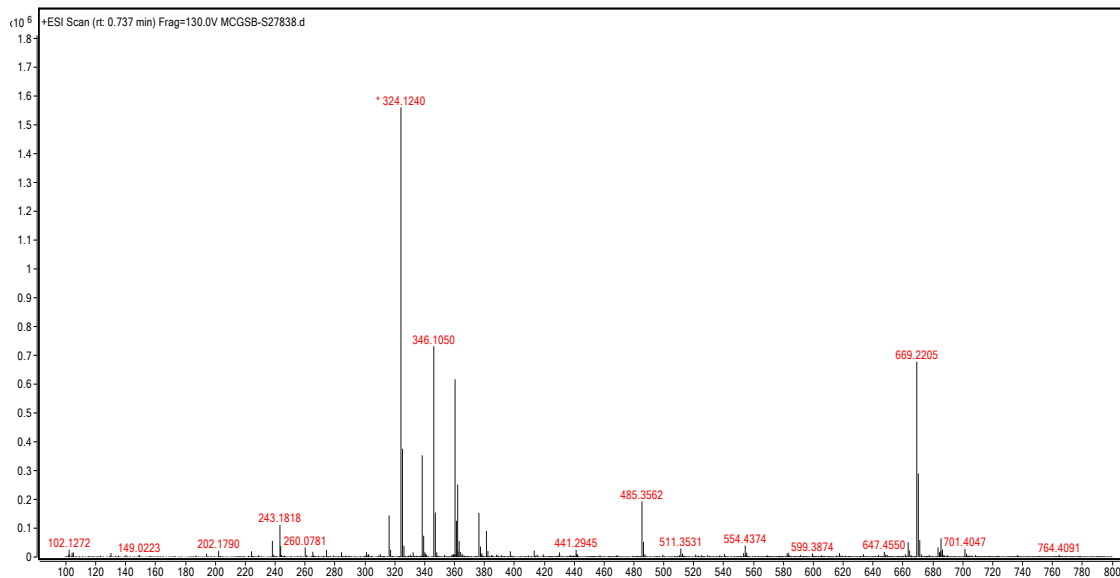

**Figure S54:** HRMS spectra of 2-(7-phenylimidazo[1,2-a]pyrimidin-3-yl)quinoxaline (**12a**)

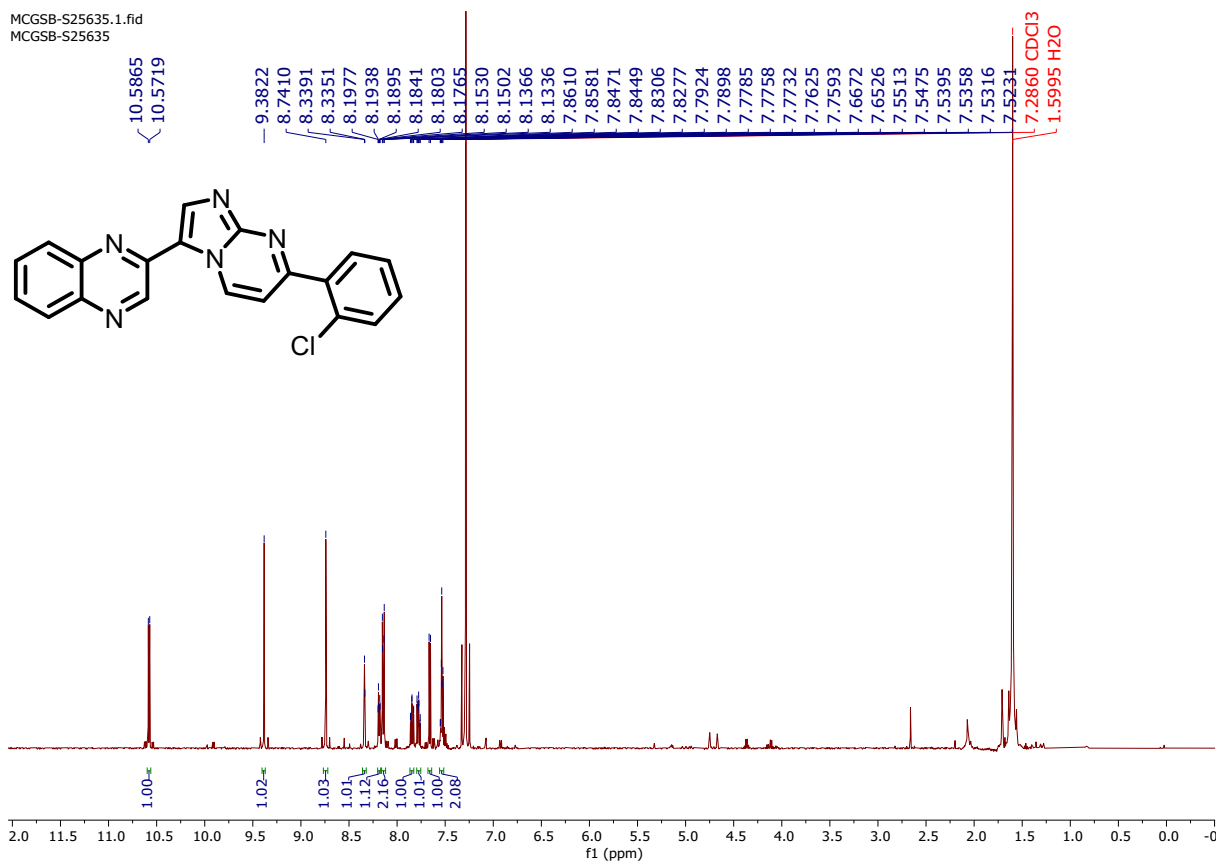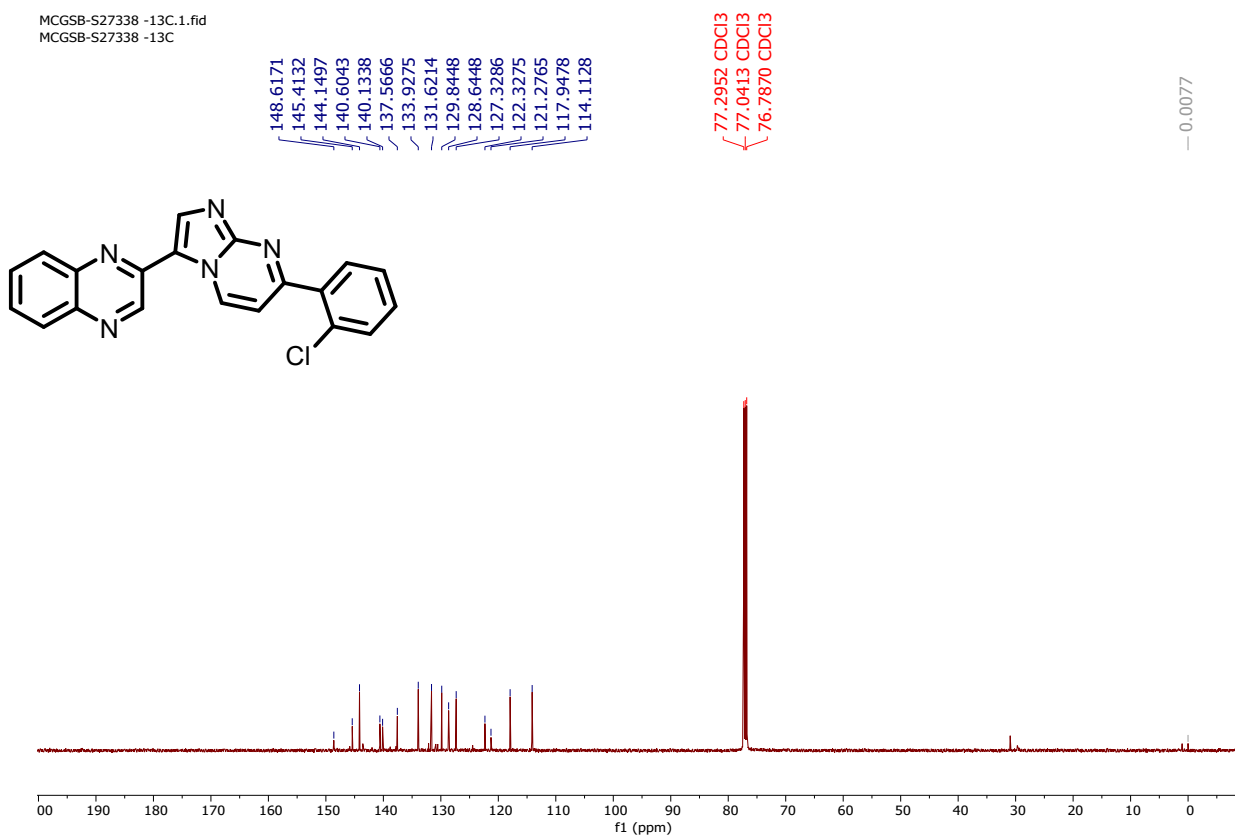

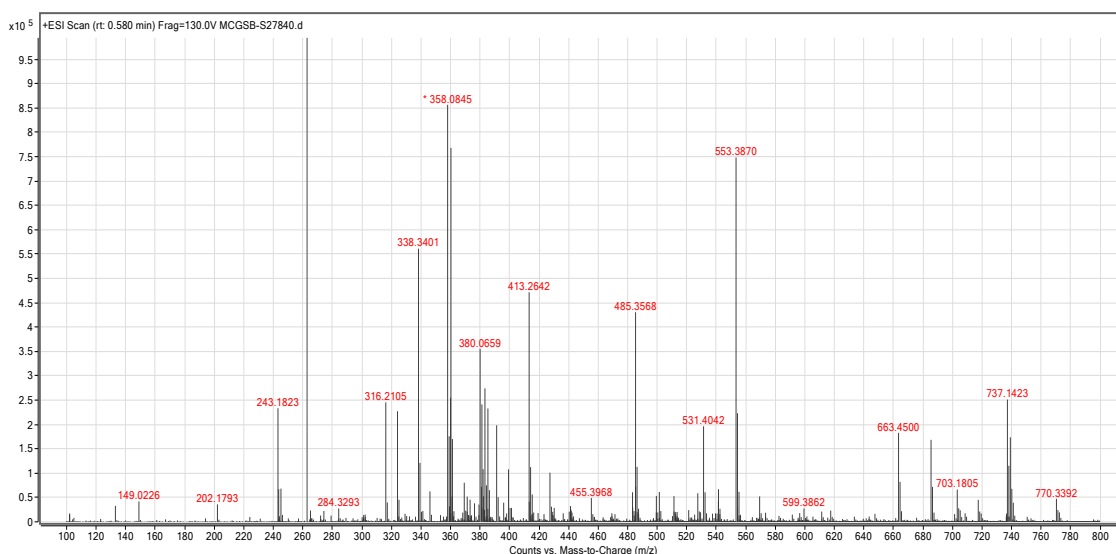

**Figure S57:** HRMS spectra of 2-(7-(2-chlorophenyl)imidazo[1,2-a]pyrimidin-3-yl)quinoxaline (12b)

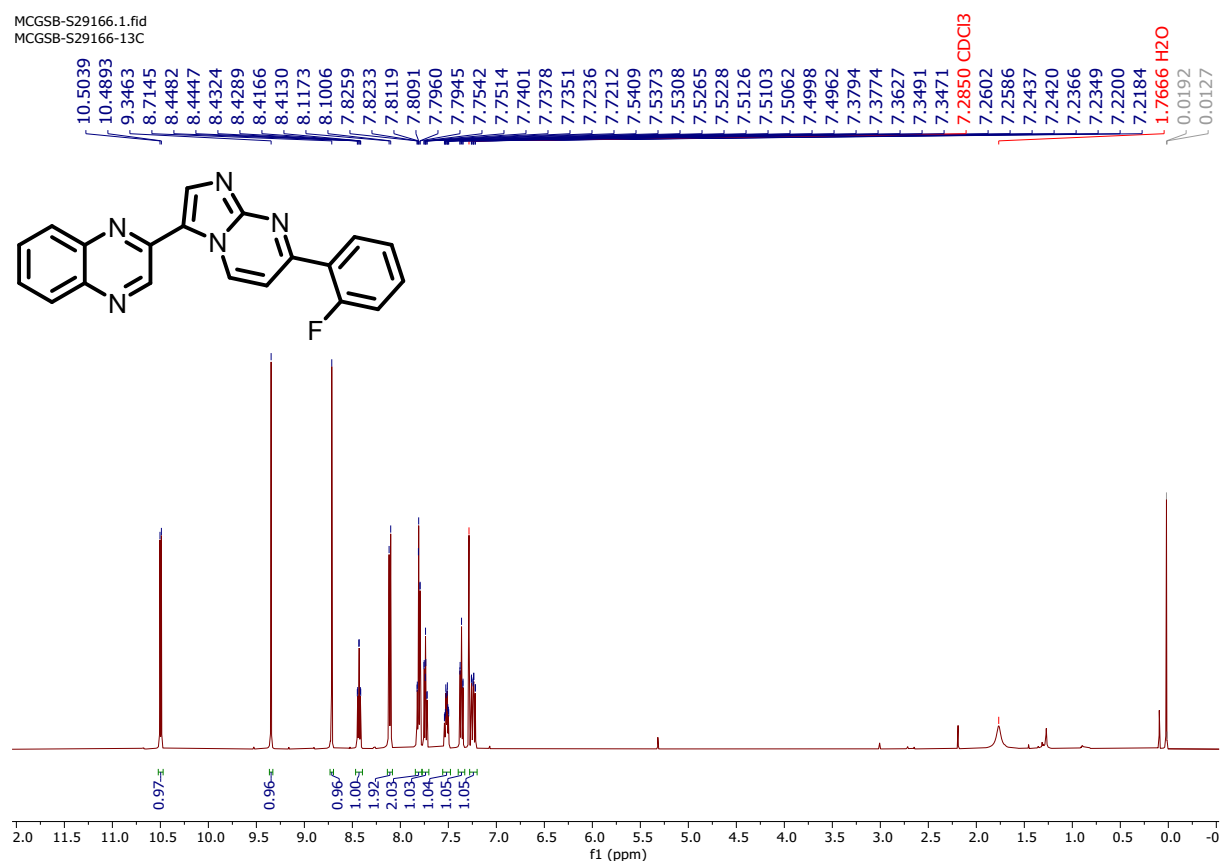

**Figure S58:**  $^1\text{H}$  NMR of 2-(7-(2-fluorophenyl)imidazo[1,2-a]pyrimidin-3-yl)quinoxaline (12c) in  $\text{CDCl}_3$  at 500 MHz

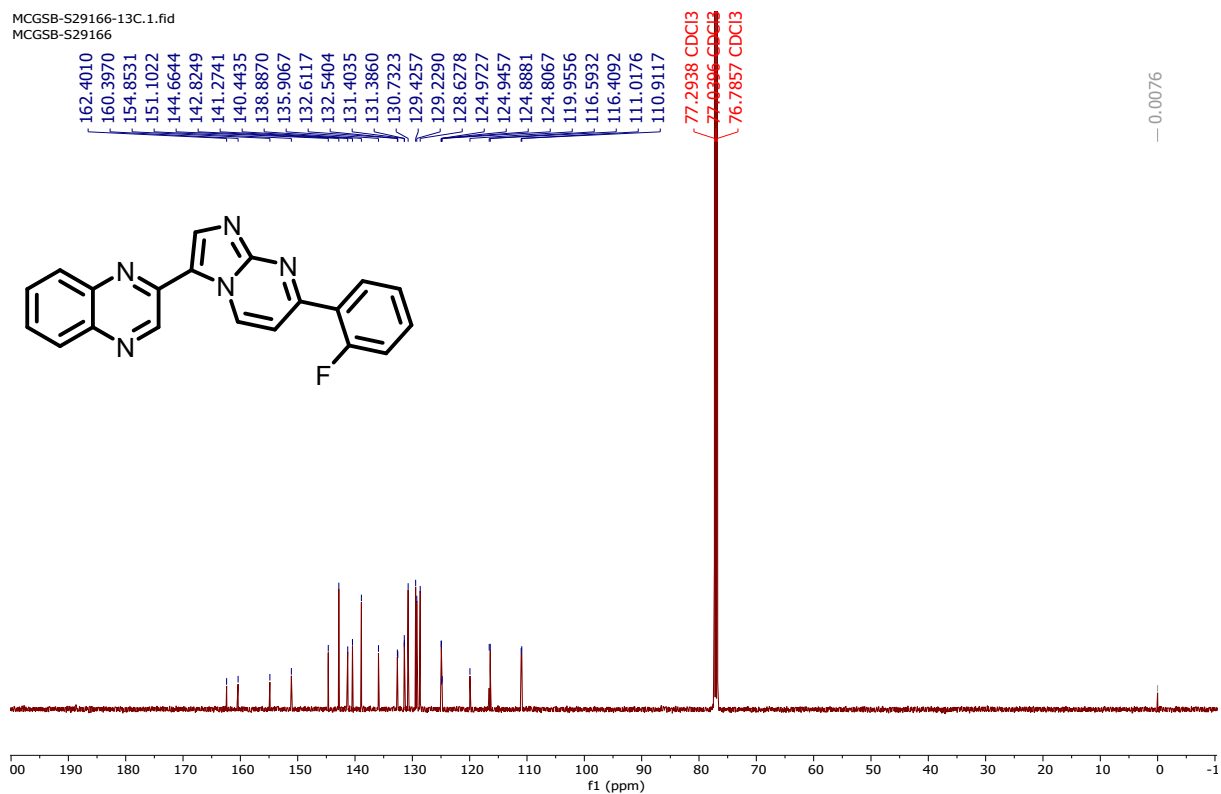

**Figure S59:**  $^{13}\text{C}$  NMR of 2-(7-(2-fluorophenyl)imidazo[1,2-a]pyrimidin-3-yl)quinoxaline (12c) in  $\text{CDCl}_3$  at 125 MHz

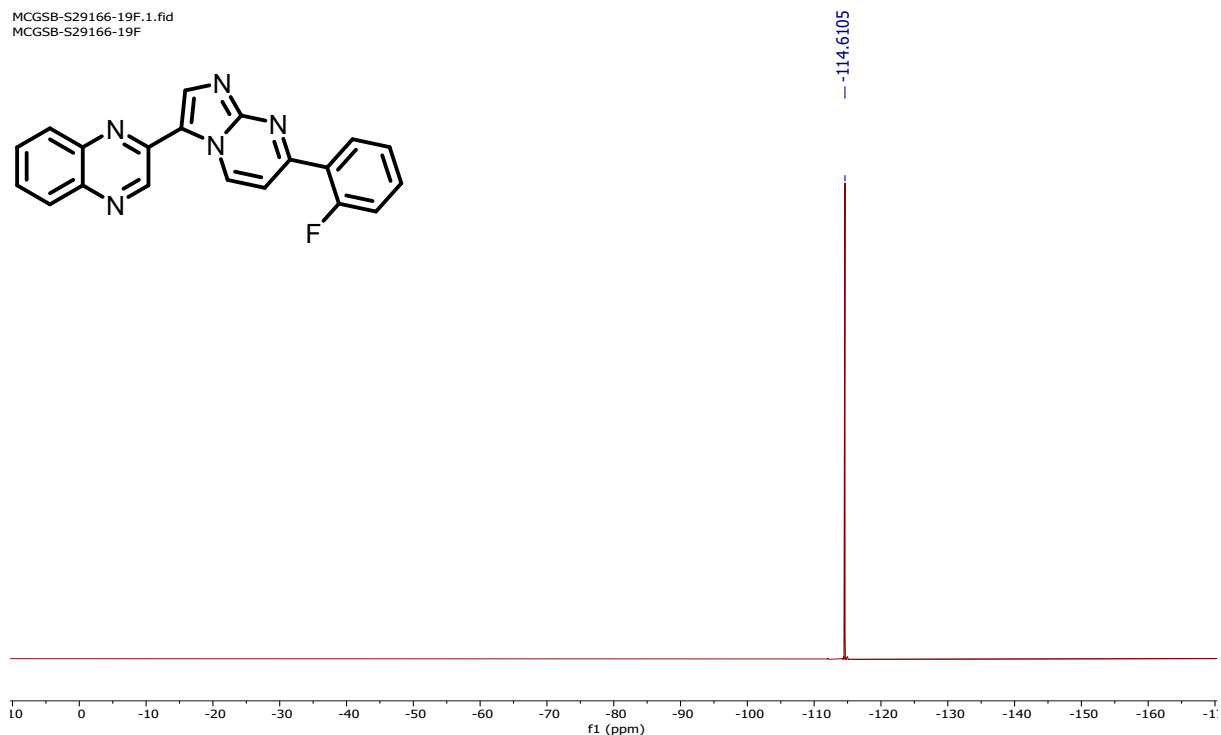

**Figure S60:**  $^{19}\text{F}$  NMR of 2-(7-(2-fluorophenyl)imidazo[1,2-a]pyrimidin-3-yl)quinoxaline (12c) in  $\text{CDCl}_3$  at 471 MHz



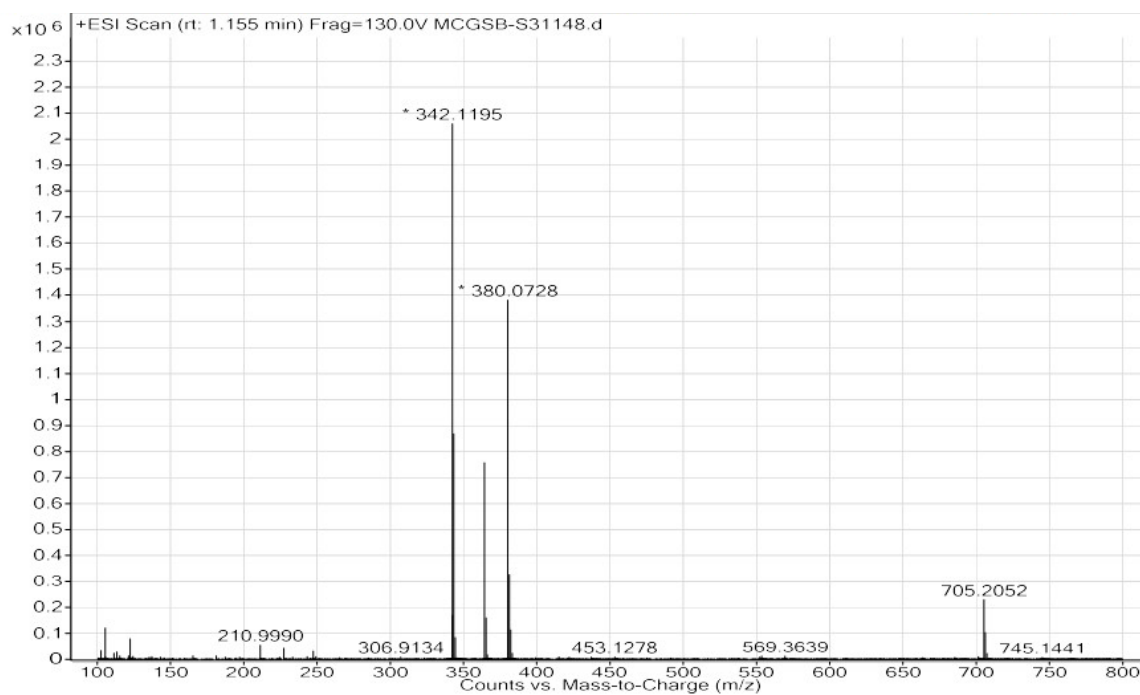

**Figure S61:** HRMS spectra of 2-(7-(2-fluorophenyl)imidazo[1,2-a]pyrimidin-3-yl)quinoxaline (12c)

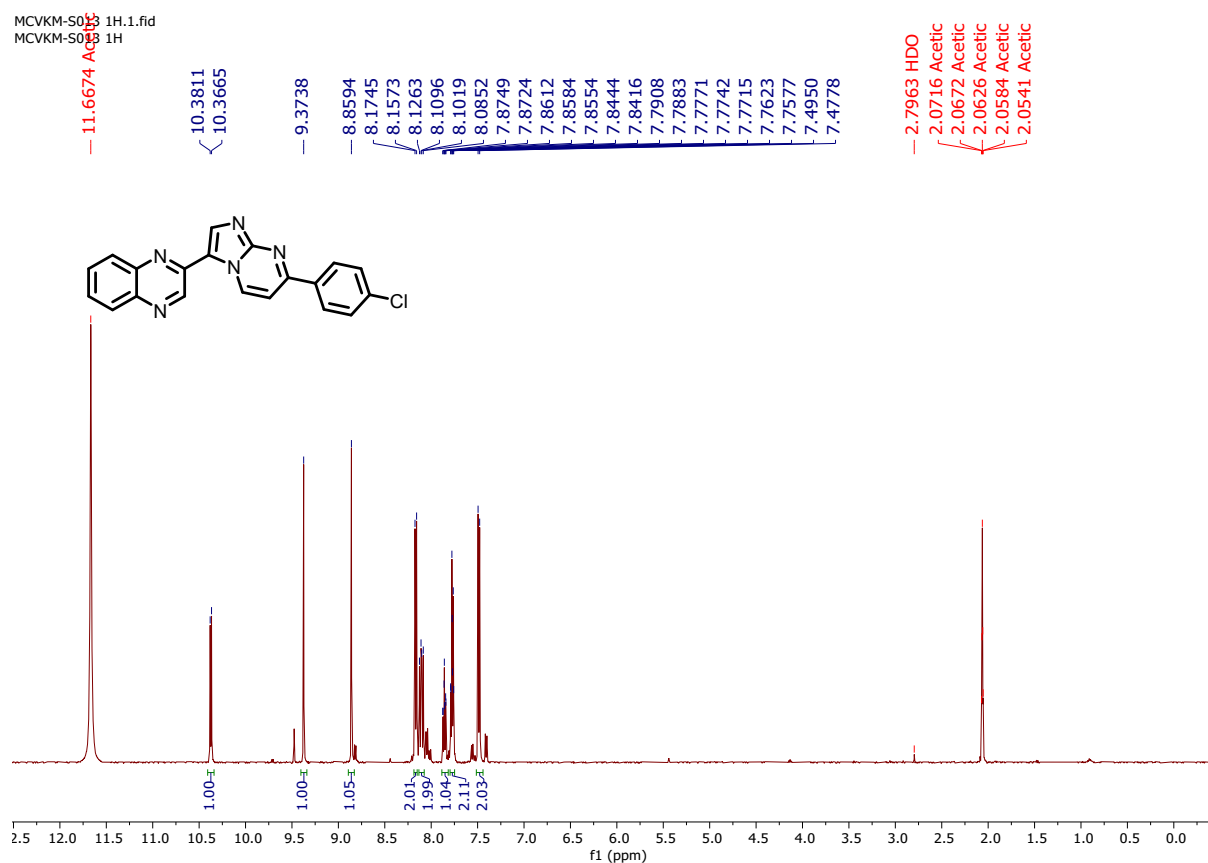

**Figure S62:**  $^1\text{H}$  NMR of 2-(7-(4-chlorophenyl)imidazo[1,2-a]pyrimidin-3-yl)quinoxaline (12d) in Acetic acid- $d_4$  at 500 MHz

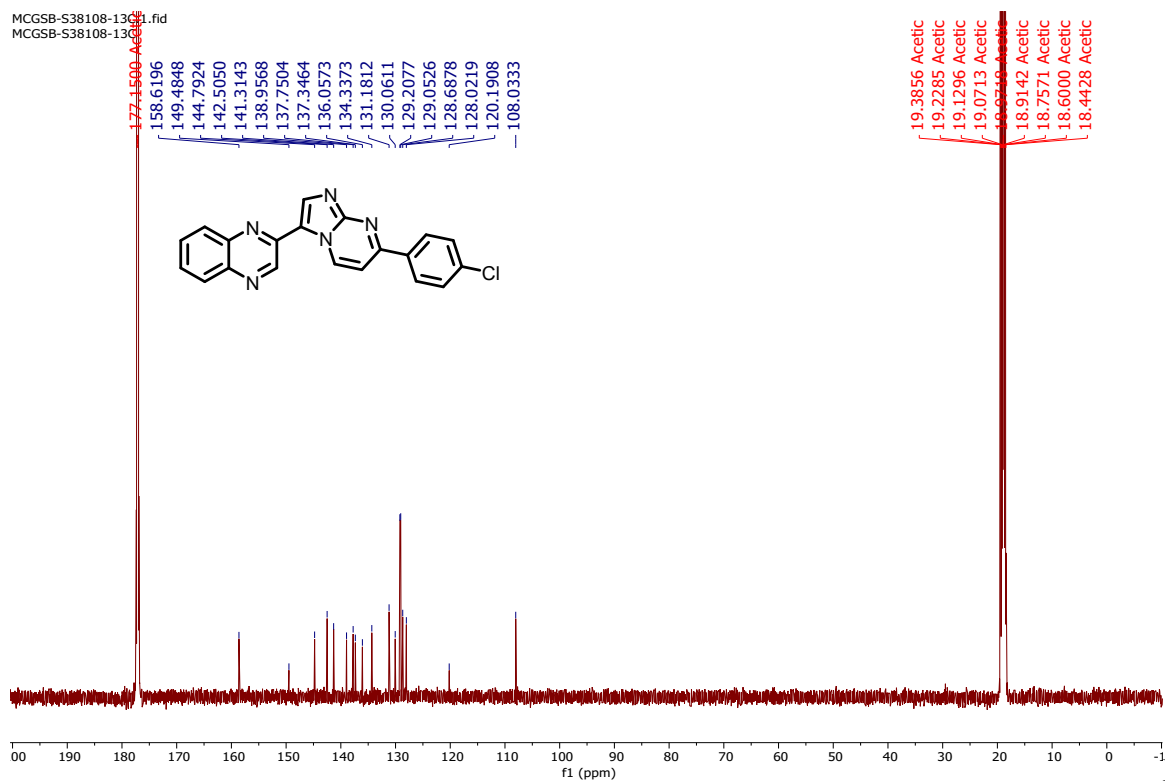

**Figure S63:**  $^{13}\text{C}$  NMR of 2-(7-(4-chlorophenyl)imidazo[1,2-a]pyrimidin-3-yl)quinoxaline (12d) in Acetic acid- $d_4$  at 125 MHz

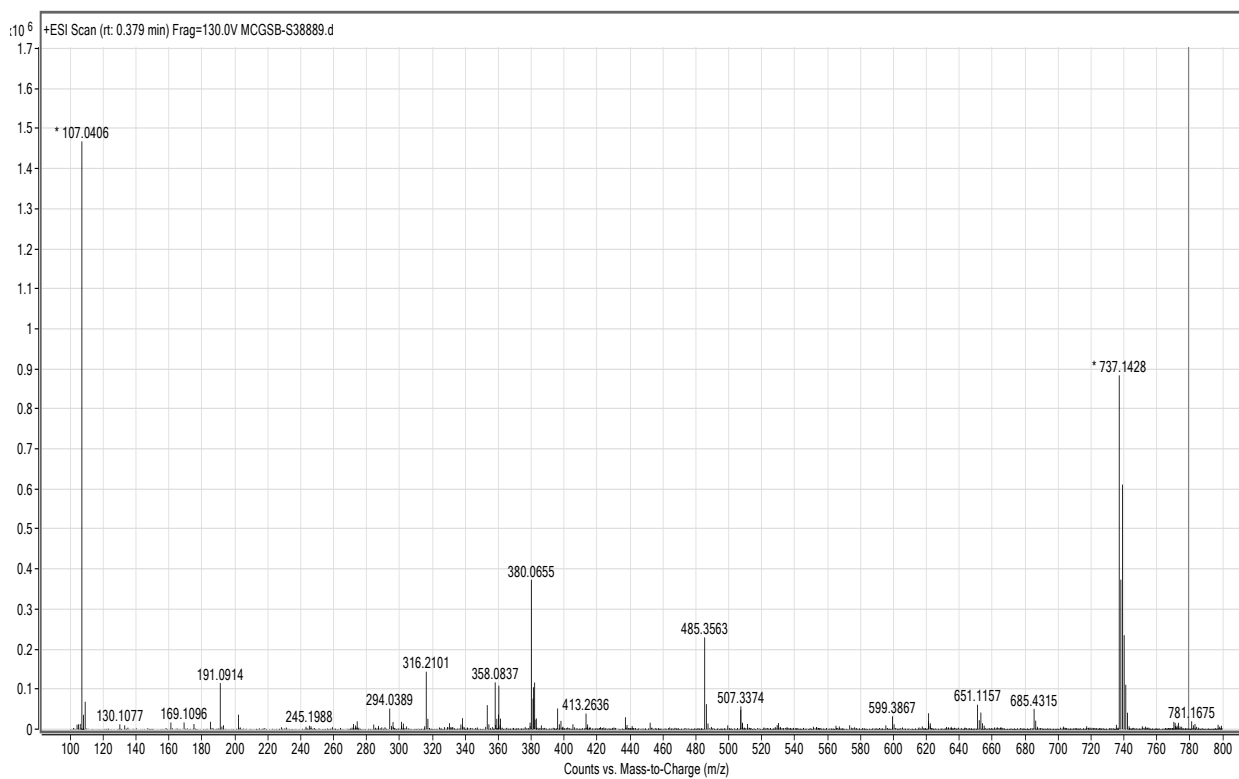

**Figure S64:** HRMS spectra of 2-(7-(4-chlorophenyl)imidazo[1,2-a]pyrimidin-3-yl)quinoxaline (12d)

MCGSB-S34453.1.fid  
MCGSB-S34453

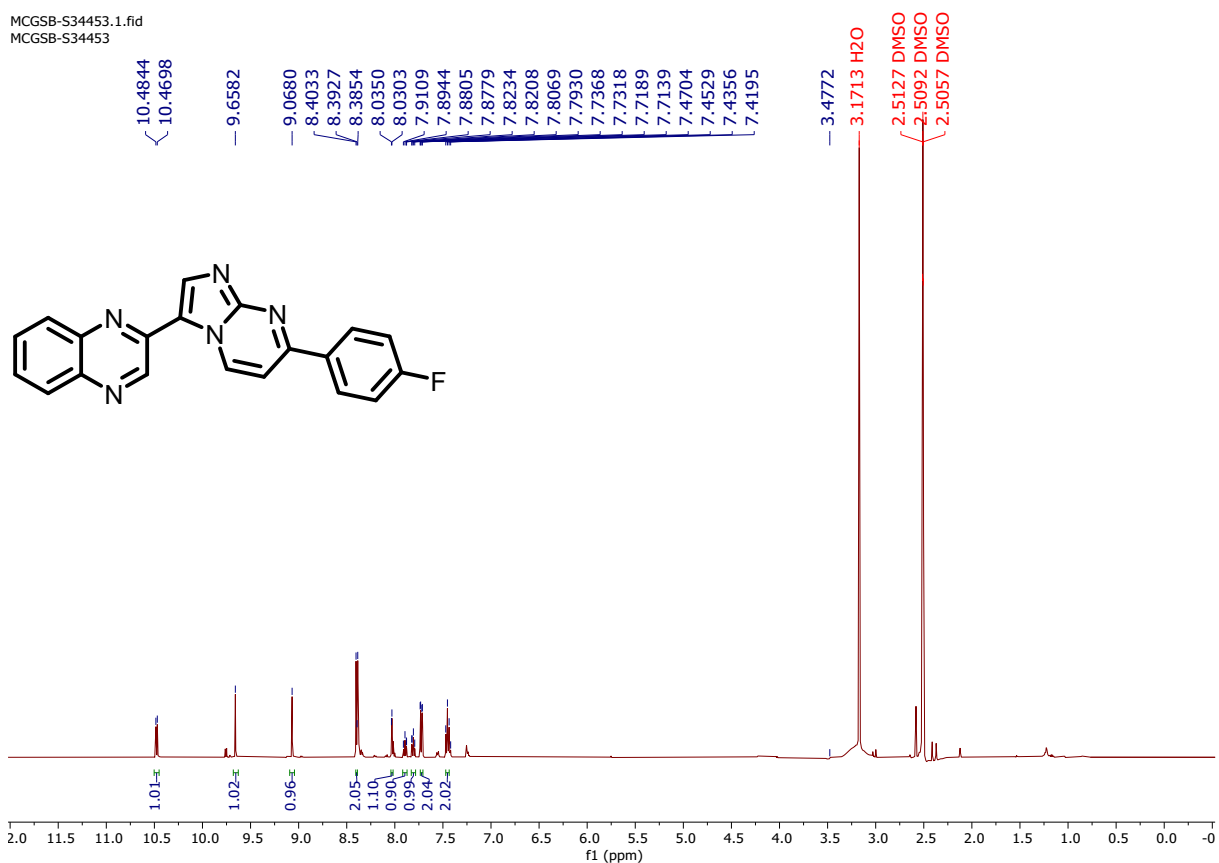

**Figure S65:**  $^1\text{H}$  NMR of 2-(7-(4-fluorophenyl)imidazo[1,2-a]pyrimidin-3-yl)quinoxaline (12e) in  $\text{DMSO-}d_6$  at 500 MHz

MCGSB-S34453-13C.1.fid  
MCGSB-S34453-13C

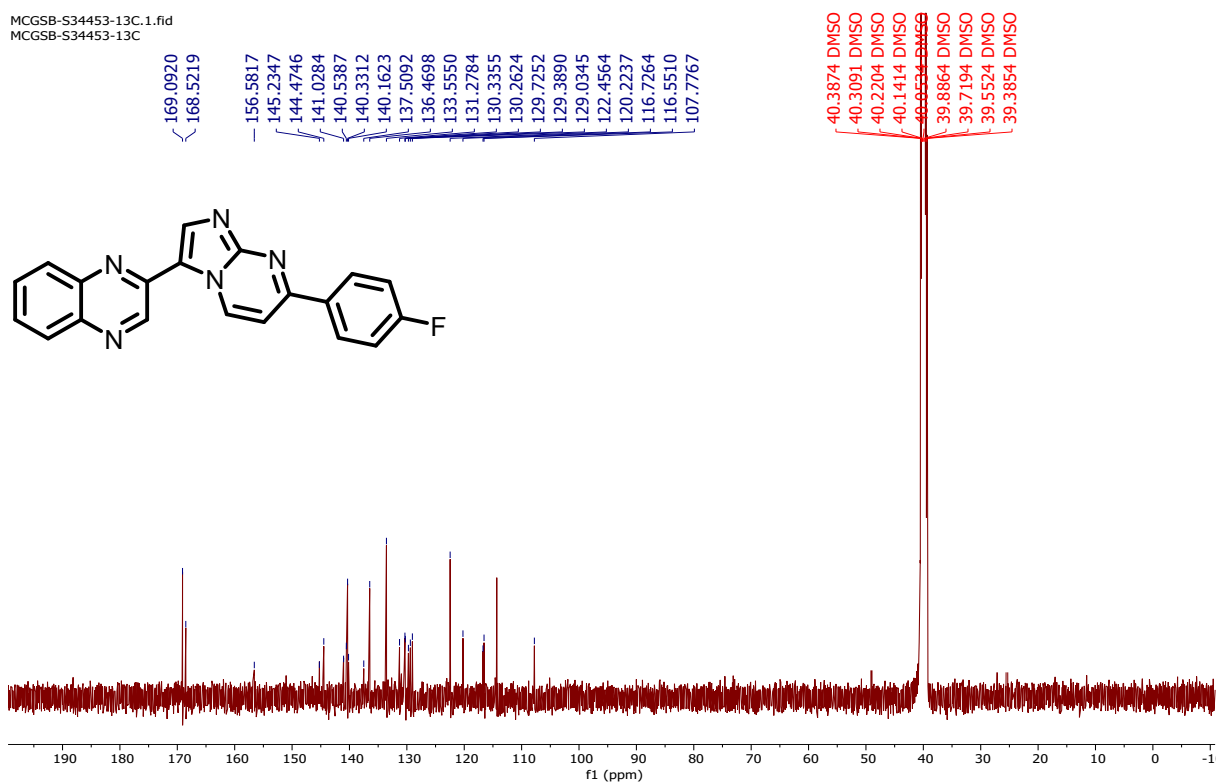

**Figure S66:**  $^{13}\text{C}$  NMR of 2-(7-(4-fluorophenyl)imidazo[1,2-a]pyrimidin-3-yl)quinoxaline (12e) in  $\text{DMSO-}d_6$  at 125 MHz

MCAKC-S39356-19F.1.fid  
MCAKC-S39356-19F

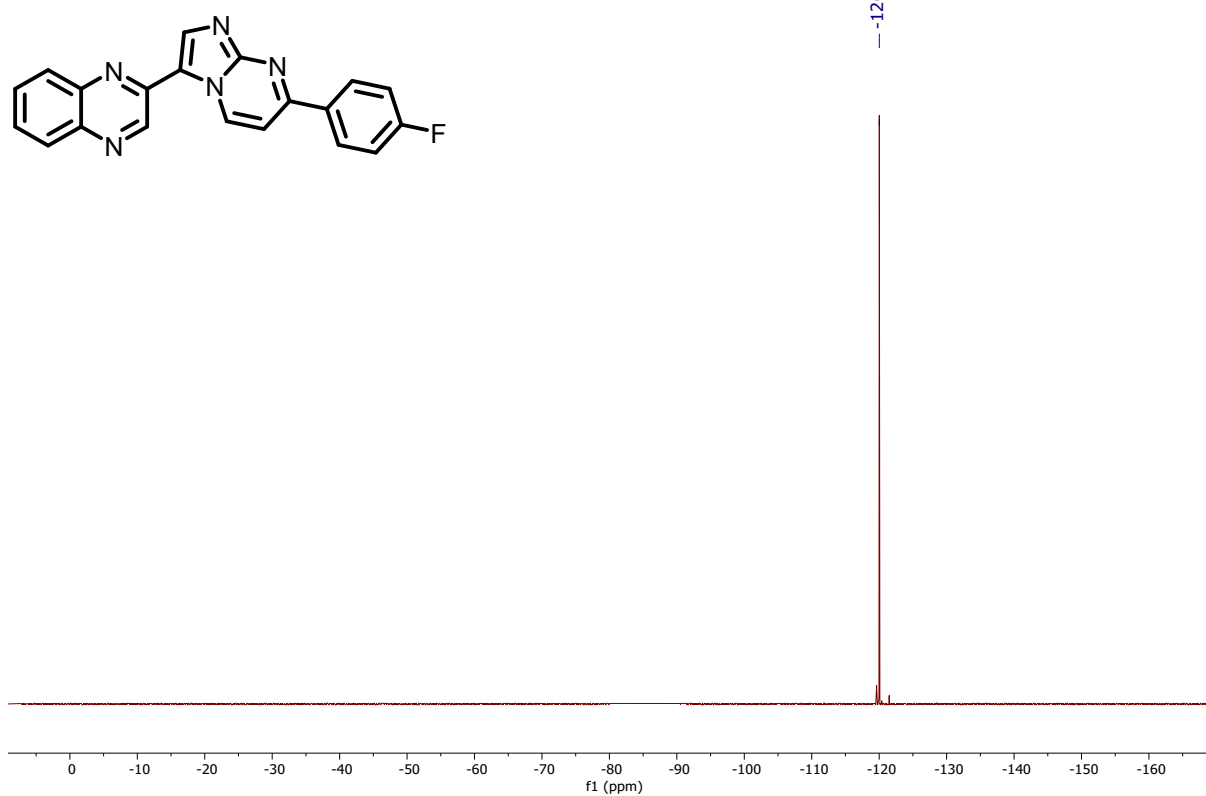

**Figure S67:**  $^{19}\text{F}$  NMR of 2-(7-(4-fluorophenyl)imidazo[1,2-a]pyrimidin-3-yl)quinoxaline (12e) in  $\text{DMSO-}d_6$  at 471 MHz

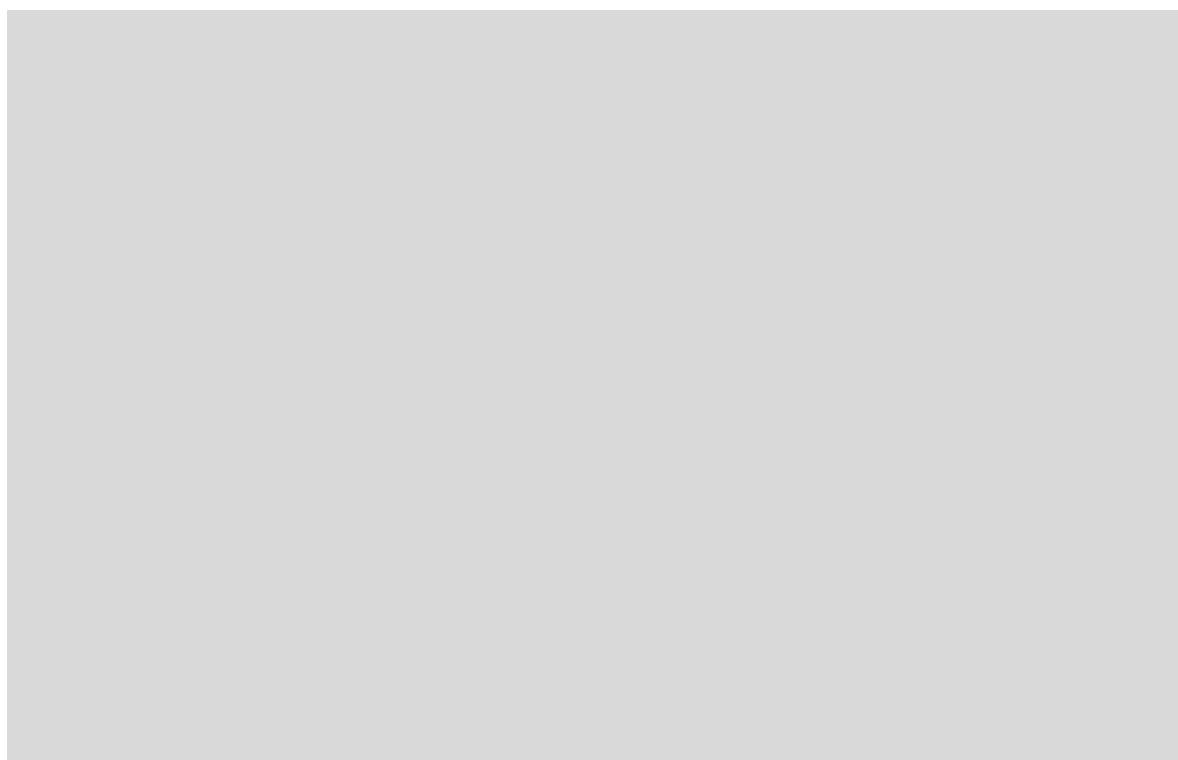

**Figure S68:** HRMS spectra of 2-(7-(4-fluorophenyl)imidazo[1,2-a]pyrimidin-3-yl)quinoxaline (12e)

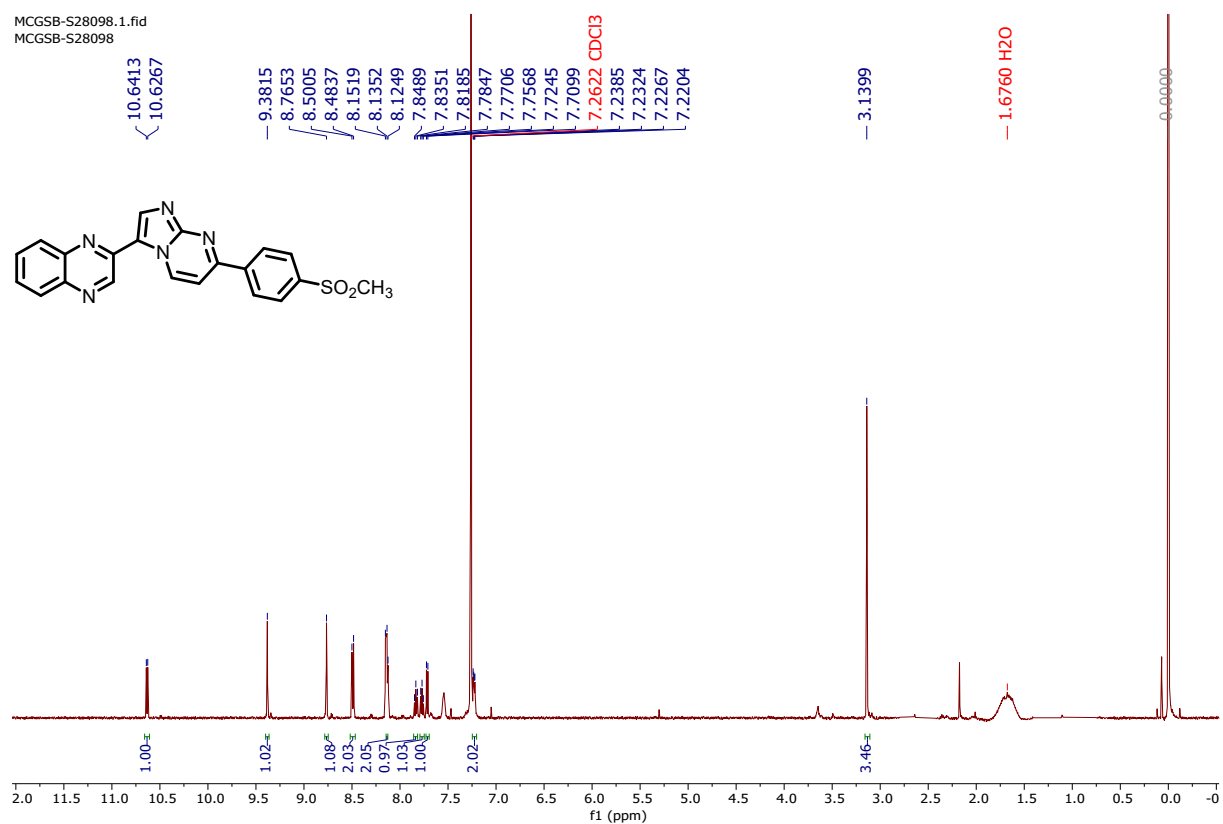

**Figure S69:**  $^1\text{H}$  NMR of 2-(7-(4-methylsulfonyl)imidazo[1,2-a]pyrimidin-3-yl)quinoxaline (12f) in  $\text{CDCl}_3$  at 500 MHz

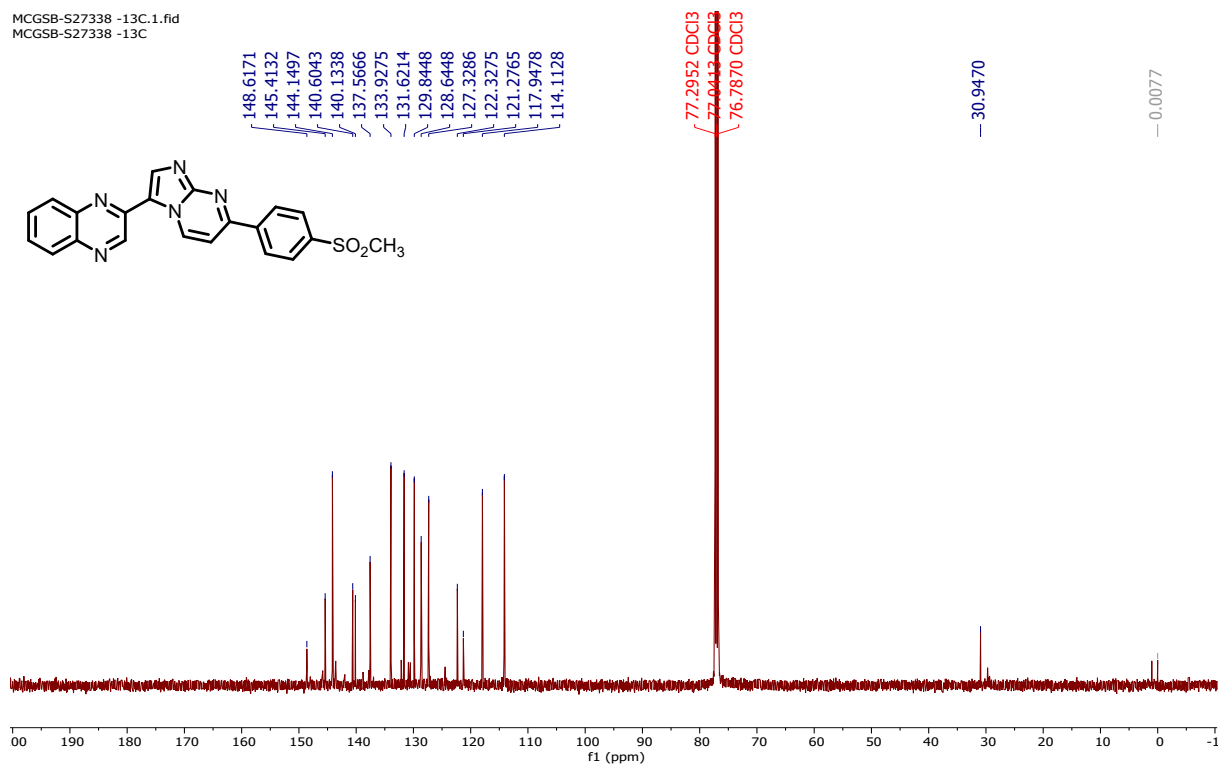

**Figure S70:**  $^{13}\text{C}$  NMR of 2-(7-(4-methylsulfonyl)imidazo[1,2-a]pyrimidin-3-yl)quinoxaline (12f) in  $\text{CDCl}_3$  at 125 MHz

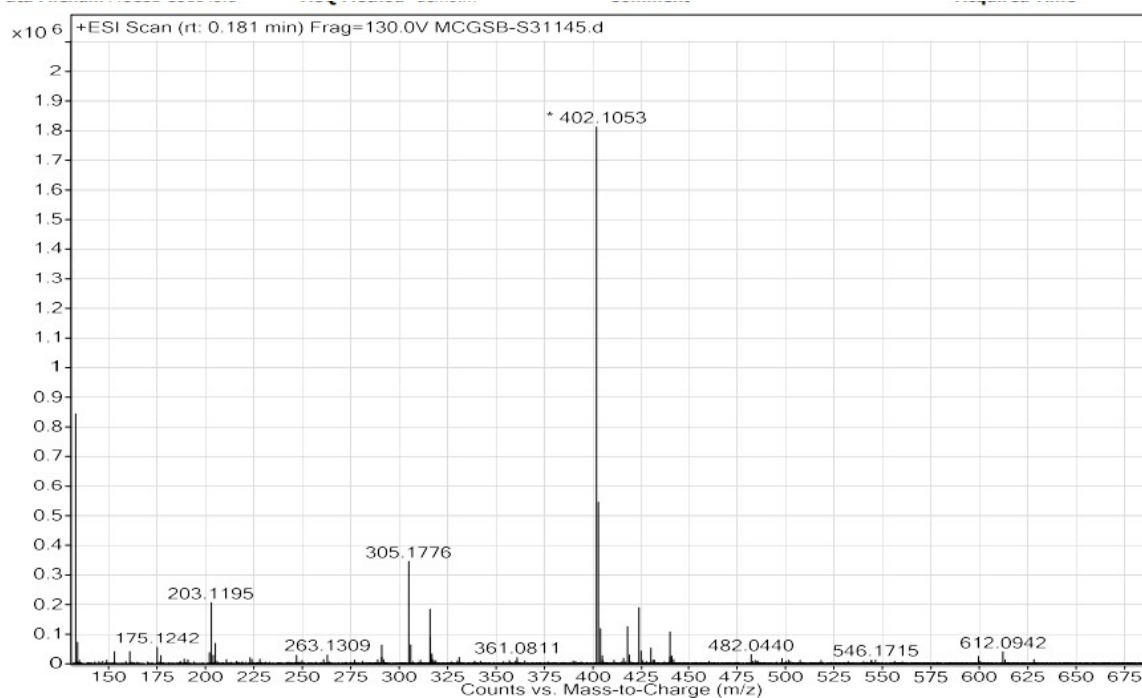

**Figure S71:** HRMS spectra of 2-(7-(4-methylsulfonyl)imidazo[1,2-a]pyrimidin-3-yl)quinoxaline(12f)

MCGSB-S38162.1.fid  
MCGSB-S38162

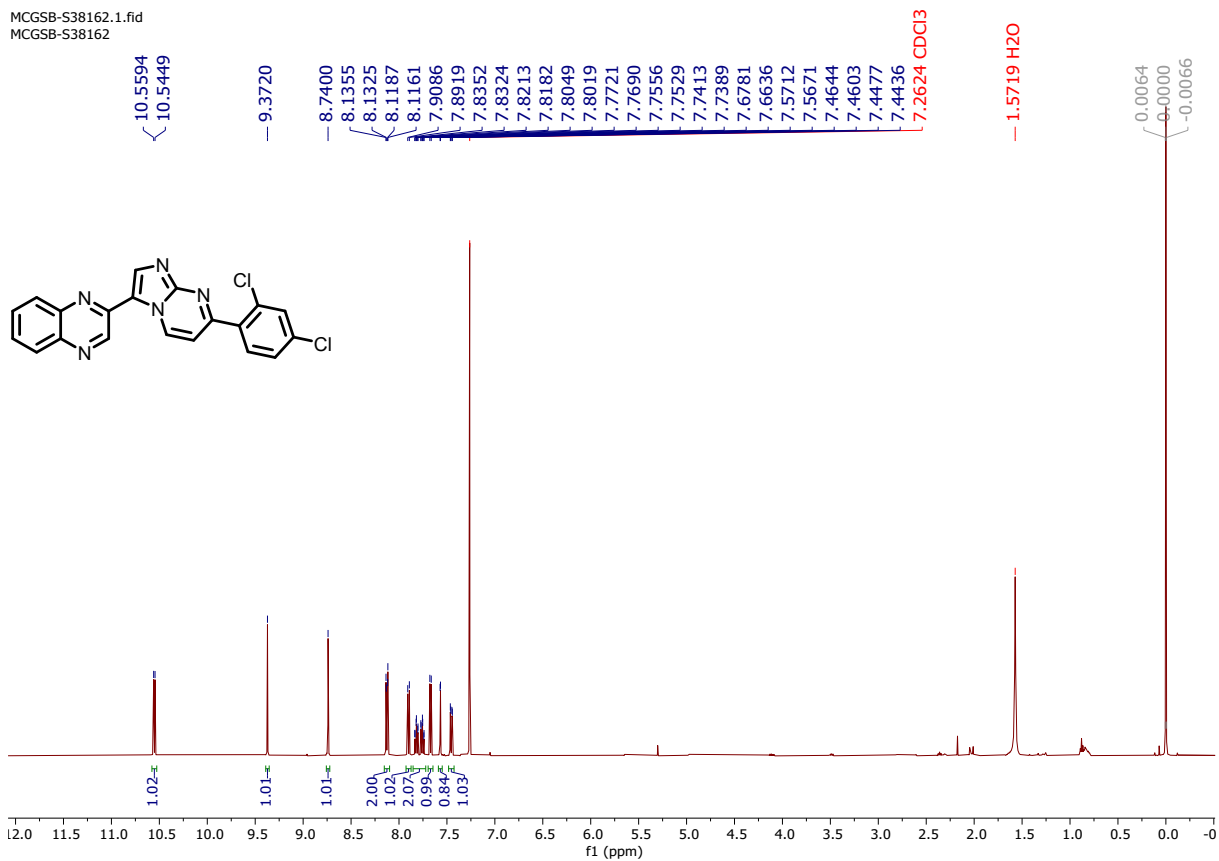

**Figure S72:** <sup>1</sup>H NMR of 2-(7-(2,4-dichlorophenyl)imidazo[1,2-a]pyrimidin-3-yl)quinoxaline (12g) in CDCl<sub>3</sub> at 500 MHz

MCGSB-S38162-13C.1.fid  
MCGSB-S38162-13C

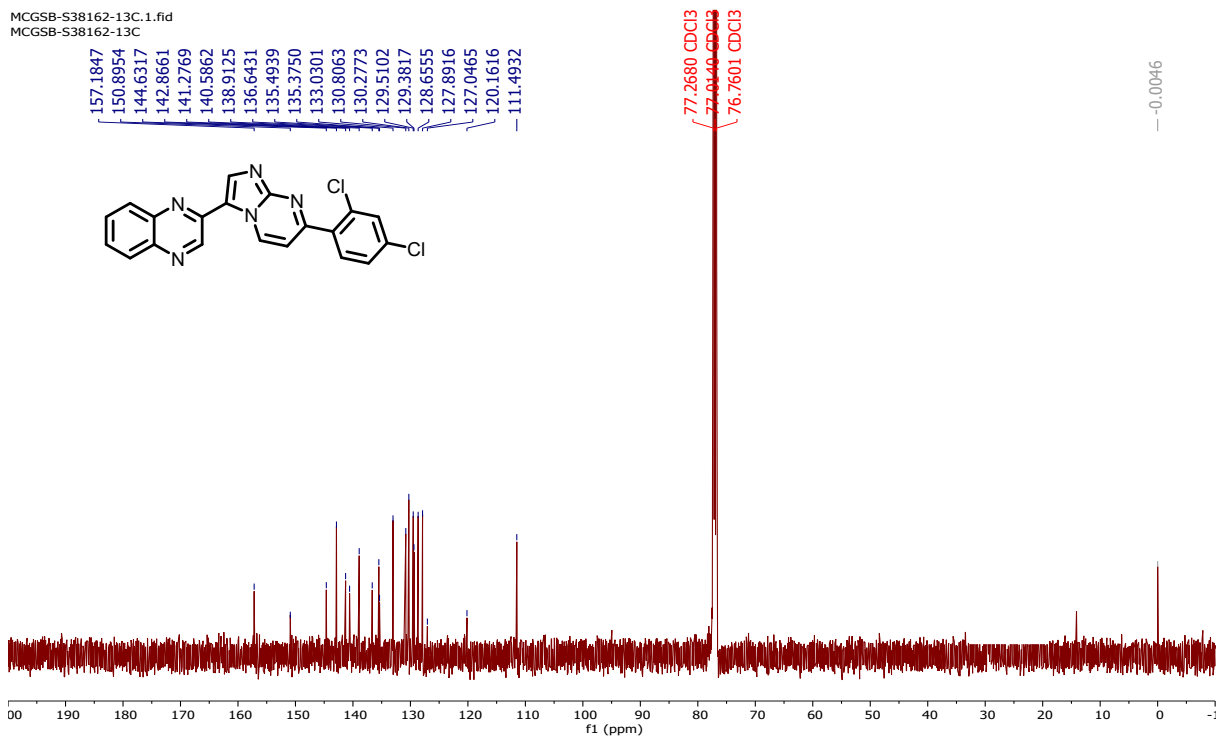

**Figure S73:** <sup>13</sup>C NMR of 2-(7-(2,4-dichlorophenyl)imidazo[1,2-a]pyrimidin-3-yl)quinoxaline (12g) in CDCl<sub>3</sub> at 125 MHz

MCGSB-S31780.1.fid  
MCGSB-S31780

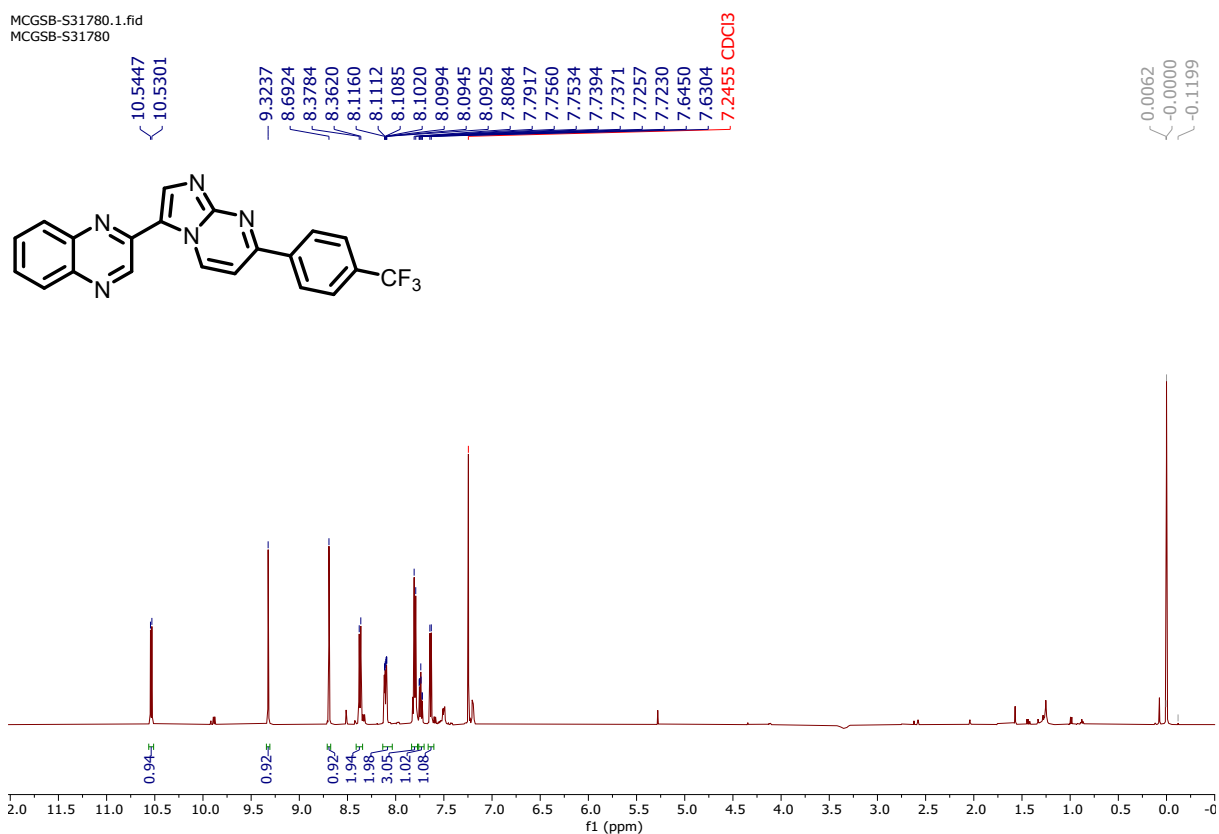

**Figure S74:** <sup>1</sup>H NMR of 2-(7-(4-(trifluoromethyl)phenyl)imidazo[1,2-a]pyrimidin-3-yl)quinoxaline (12h) in CDCl<sub>3</sub> at 500 MHz



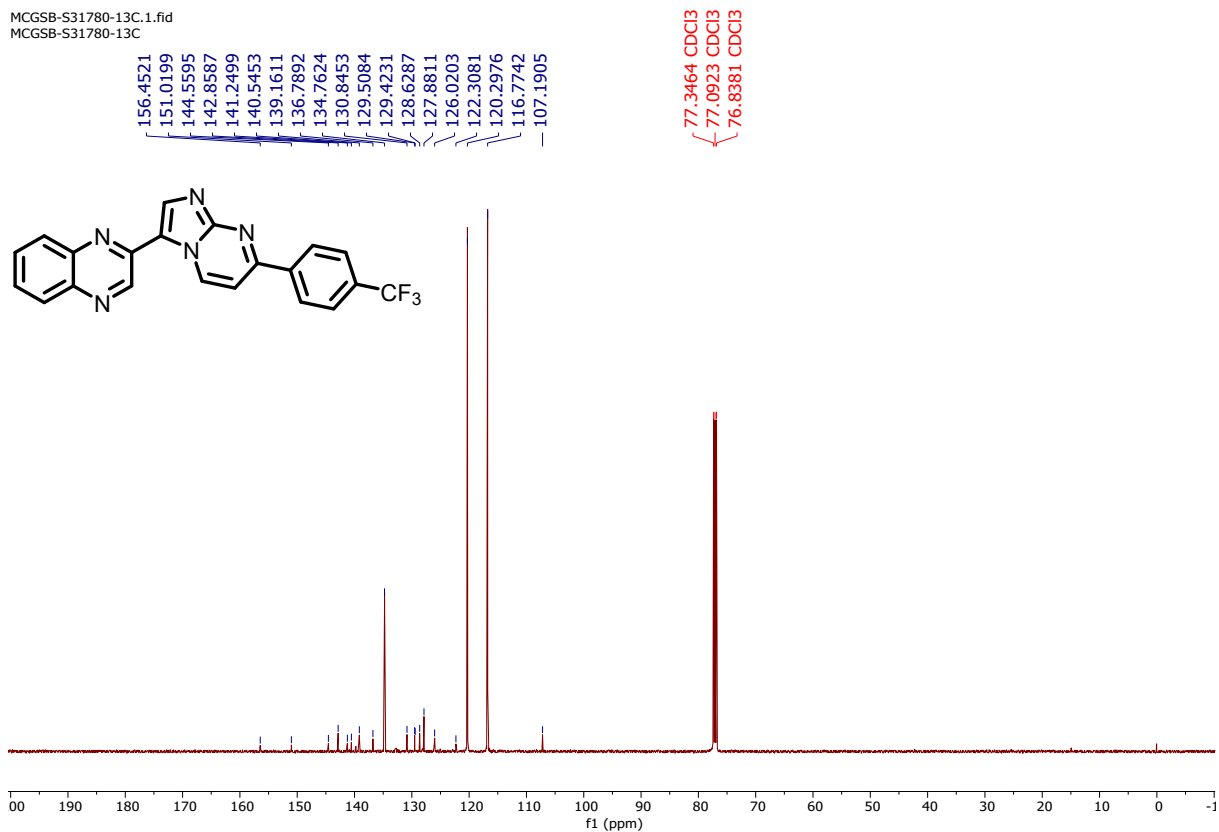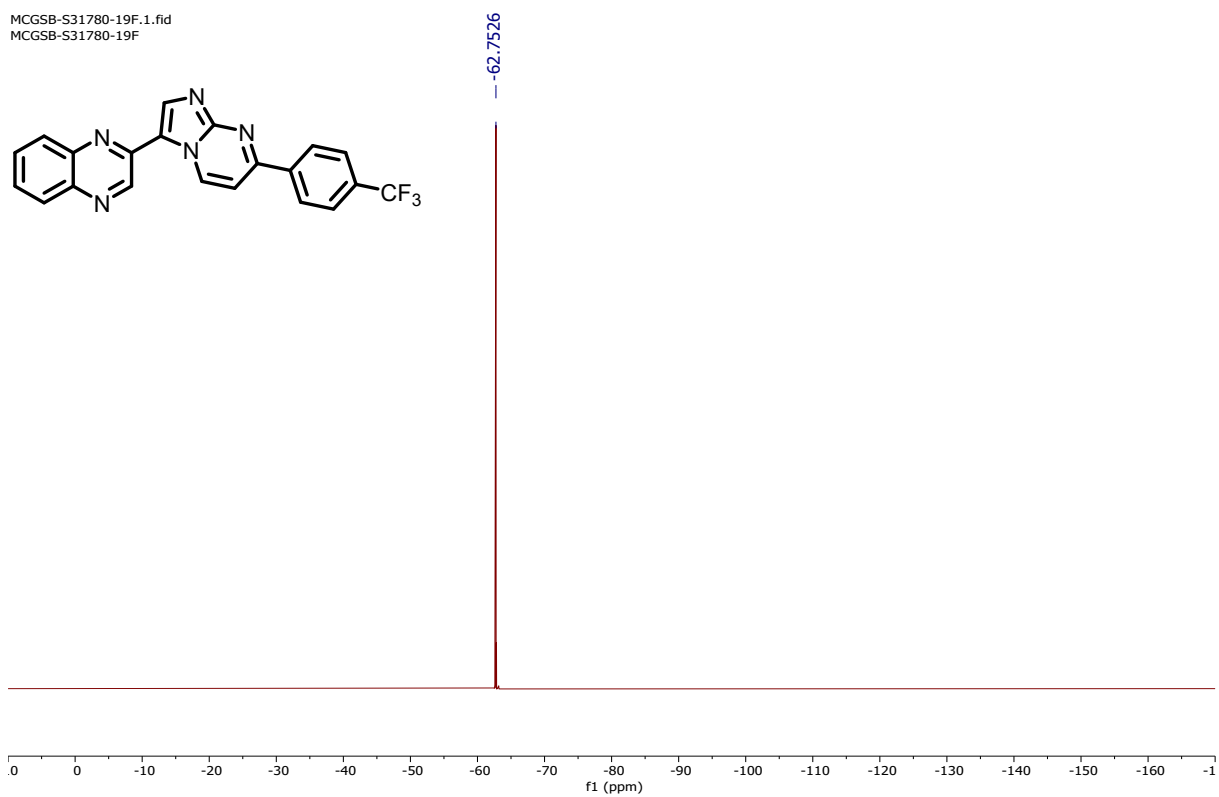

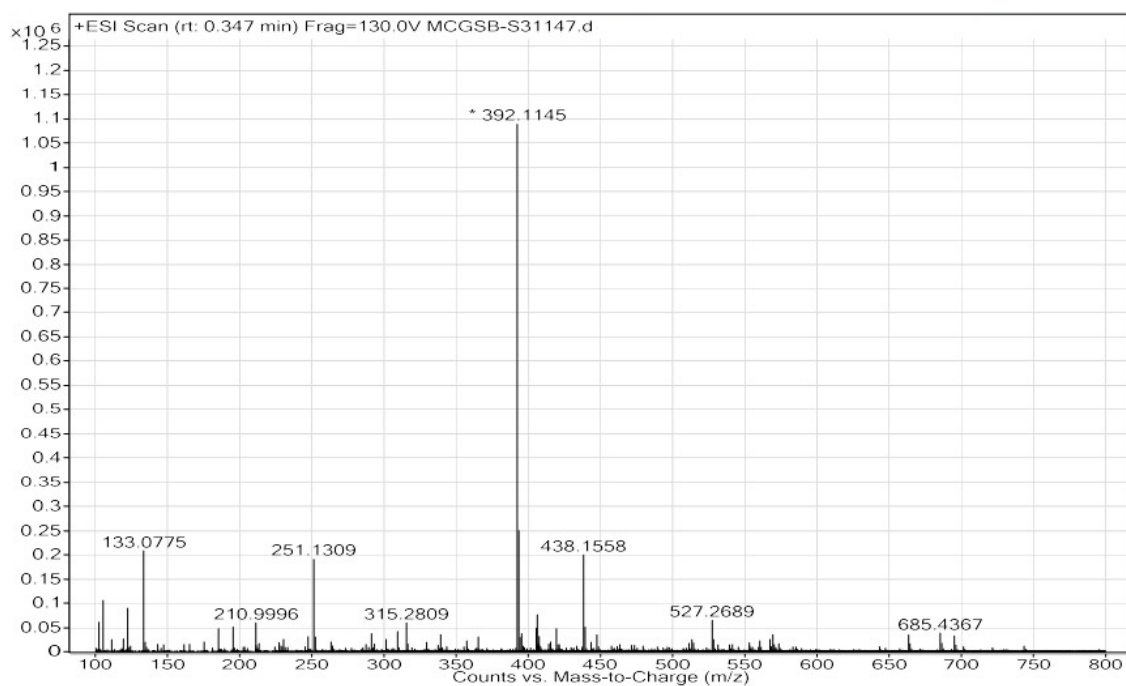

**Figure S77:** HRMS spectra of 2-(7-(4-(trifluoromethyl)phenyl)imidazo[1,2-a]pyrimidin-3-yl)quinoxaline (**12h**)

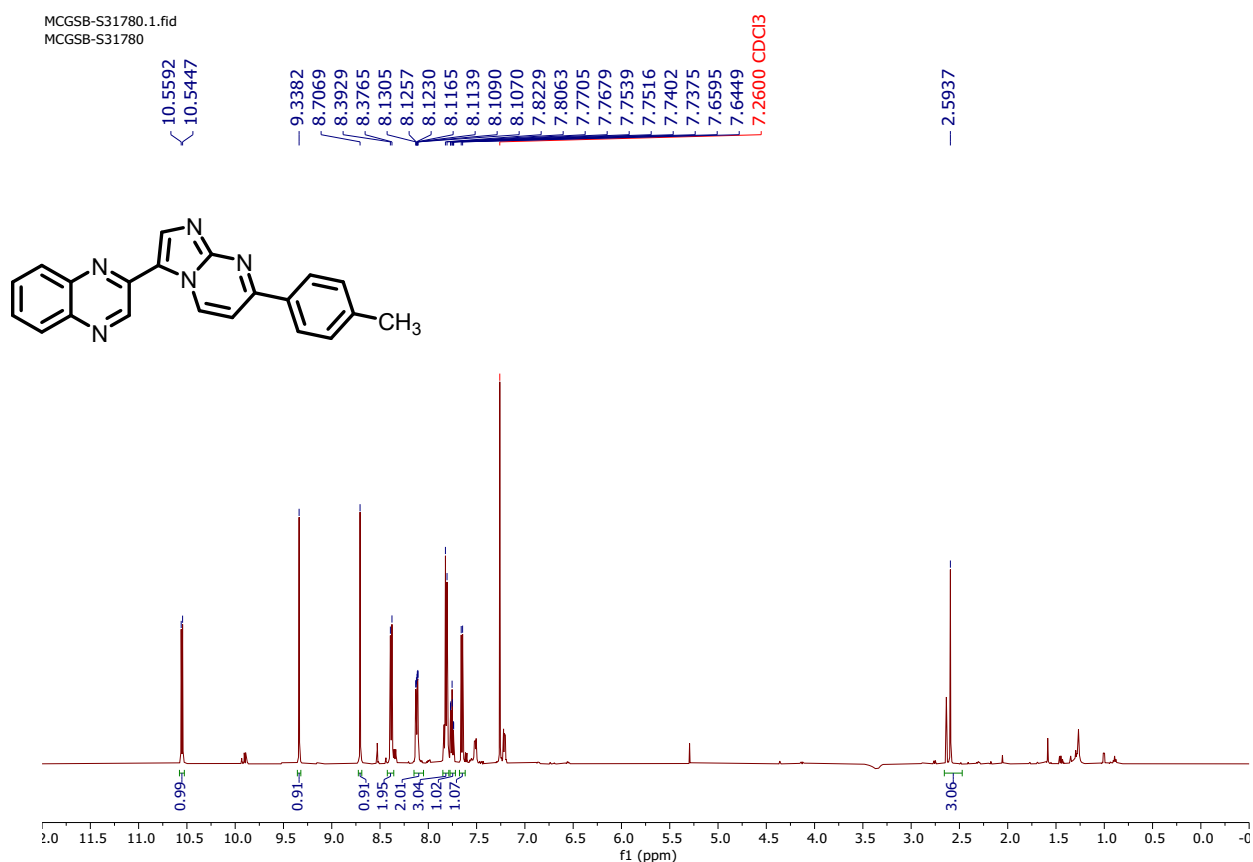

**Figure S78:** <sup>1</sup>H NMR of 2-(7-(4-(methyl)phenyl)imidazo [1,2-a]pyrimidin-3-yl)quinoxaline (**12i**) in CDCl<sub>3</sub> at 500 MHz

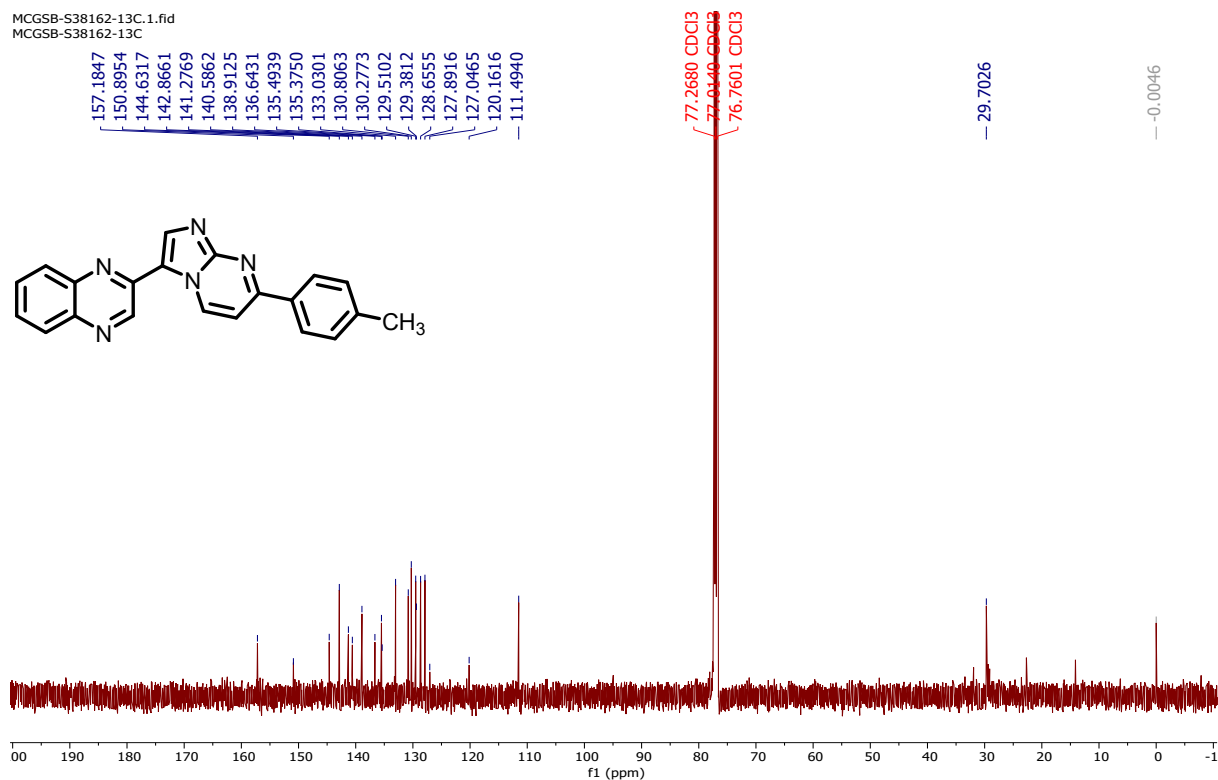

**Figure S79:**  $^{13}\text{C}$  NMR of 2-(7-(4-(methyl)phenyl)imidazo[1,2-a]pyrimidin-3-yl)quinoxaline (12i) in  $\text{CDCl}_3$  at 125 MHz

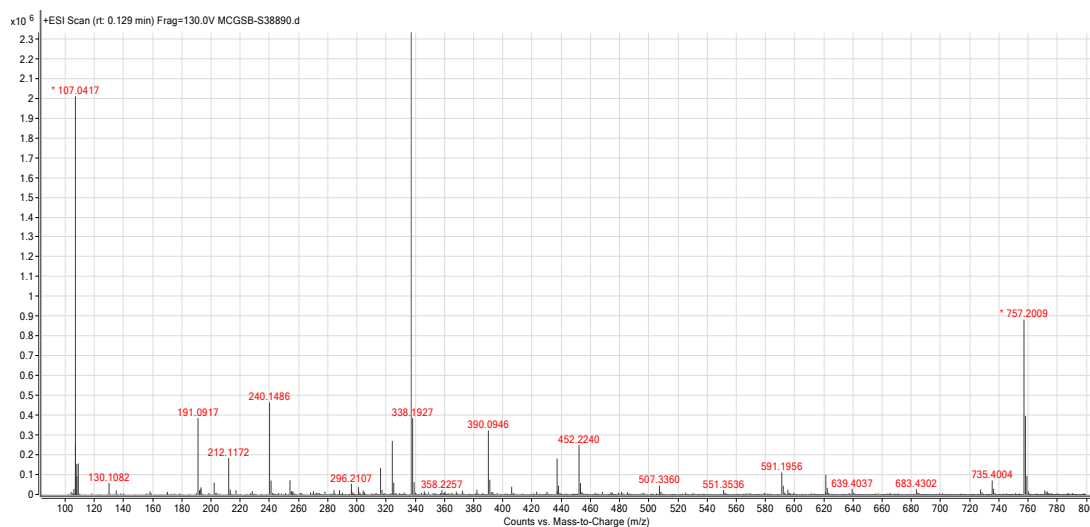

**Figure S80:** HRMS spectra of 2-(7-(4-(methyl)phenyl)imidazo[1,2-a]pyrimidin-3-yl)quinoxaline (12i)

### 3. *in silico* ADME results for the synthesized compounds

**Table S2.** Evaluation of the ADME properties of all the synthesized compounds.

| Compound | logP | logS | Caco-2d | logHERG | PMDCK | %Human Oral |
|----------|------|------|---------|---------|-------|-------------|
|----------|------|------|---------|---------|-------|-------------|

|                                                                                                                                                                                                                                                                                                                                                                                                                                                                                                                                                                                                                  | (o/w) |        |          |        |         | Absorption |
|------------------------------------------------------------------------------------------------------------------------------------------------------------------------------------------------------------------------------------------------------------------------------------------------------------------------------------------------------------------------------------------------------------------------------------------------------------------------------------------------------------------------------------------------------------------------------------------------------------------|-------|--------|----------|--------|---------|------------|
| <b>12a</b>                                                                                                                                                                                                                                                                                                                                                                                                                                                                                                                                                                                                       | 3.938 | -5.031 | 2059.967 | -6.882 | 1080.43 | 100        |
| <b>10a</b>                                                                                                                                                                                                                                                                                                                                                                                                                                                                                                                                                                                                       | 2.135 | -2.864 | 1494.989 | -5.45  | 764.035 | 96.267     |
| <b>10b</b>                                                                                                                                                                                                                                                                                                                                                                                                                                                                                                                                                                                                       | 3.079 | -4.267 | 1496.058 | -5.347 | 3913.15 | 100        |
| <b>10c</b>                                                                                                                                                                                                                                                                                                                                                                                                                                                                                                                                                                                                       | 2.639 | -3.629 | 1495.535 | -5.407 | 1882.39 | 100        |
| <b>10d</b>                                                                                                                                                                                                                                                                                                                                                                                                                                                                                                                                                                                                       | 2.46  | -3.47  | 1495.226 | -5.415 | 764.166 | 100        |
| <b>10e</b>                                                                                                                                                                                                                                                                                                                                                                                                                                                                                                                                                                                                       | 1.384 | -2.918 | 177.561  | -5.45  | 76.381  | 75.309     |
| <b>10f</b>                                                                                                                                                                                                                                                                                                                                                                                                                                                                                                                                                                                                       | 3.755 | -4.826 | 1494.876 | -6.905 | 763.972 | 100        |
| <b>10g</b>                                                                                                                                                                                                                                                                                                                                                                                                                                                                                                                                                                                                       | 2.718 | -3.749 | 1495.498 | -5.445 | 2023.92 | 100        |
| <b>10h</b>                                                                                                                                                                                                                                                                                                                                                                                                                                                                                                                                                                                                       | 2.373 | -3.236 | 1495.203 | -5.343 | 1378.34 | 100        |
| <b>10i</b>                                                                                                                                                                                                                                                                                                                                                                                                                                                                                                                                                                                                       | 2.935 | -3.509 | 2728.62  | -5.652 | 1464.04 | 100        |
| <b>10j</b>                                                                                                                                                                                                                                                                                                                                                                                                                                                                                                                                                                                                       | 3.879 | -4.642 | 2730.327 | -5.547 | 7498.19 | 100        |
| <b>10k</b>                                                                                                                                                                                                                                                                                                                                                                                                                                                                                                                                                                                                       | 3.361 | -4.245 | 2728.803 | -5.608 | 3605.89 | 100        |
| <b>10l</b>                                                                                                                                                                                                                                                                                                                                                                                                                                                                                                                                                                                                       | 3.259 | -4.115 | 2728.607 | -5.616 | 1464.03 | 100        |
| <b>10m</b>                                                                                                                                                                                                                                                                                                                                                                                                                                                                                                                                                                                                       | 2.178 | -3.548 | 324.002  | -5.632 | 146.322 | 84.632     |
| <b>10n</b>                                                                                                                                                                                                                                                                                                                                                                                                                                                                                                                                                                                                       | 4.565 | -5.51  | 2728.132 | -7.145 | 1463.76 | 100        |
| <b>10o</b>                                                                                                                                                                                                                                                                                                                                                                                                                                                                                                                                                                                                       | 3.503 | -4.394 | 2728.687 | -5.646 | 3876.95 | 100        |
| <b>10p</b>                                                                                                                                                                                                                                                                                                                                                                                                                                                                                                                                                                                                       | 3.16  | -3.871 | 2728.614 | -5.545 | 2640.96 | 100        |
| <b>12d</b>                                                                                                                                                                                                                                                                                                                                                                                                                                                                                                                                                                                                       | 4.443 | -5.797 | 2060.387 | -6.806 | 2664.54 | 100        |
| <b>12e</b>                                                                                                                                                                                                                                                                                                                                                                                                                                                                                                                                                                                                       | 4.179 | -5.412 | 2060.91  | -6.769 | 1951.83 | 100        |
| <b>12f</b>                                                                                                                                                                                                                                                                                                                                                                                                                                                                                                                                                                                                       | 2.452 | -4.422 | 365.54   | -6.975 | 167.087 | 87.176     |
| <b>12g</b>                                                                                                                                                                                                                                                                                                                                                                                                                                                                                                                                                                                                       | 4.861 | -6.416 | 1988.217 | -6.714 | 5218.93 | 100        |
| <b>12h</b>                                                                                                                                                                                                                                                                                                                                                                                                                                                                                                                                                                                                       | 4.952 | -6.534 | 2062.103 | -6.871 | 4760.3  | 100        |
| <b>12i</b>                                                                                                                                                                                                                                                                                                                                                                                                                                                                                                                                                                                                       | 4.267 | -5.65  | 2059.73  | -6.817 | 1080.29 | 100        |
| <b>12b</b>                                                                                                                                                                                                                                                                                                                                                                                                                                                                                                                                                                                                       | 4.354 | -5.645 | 1987.045 | -6.789 | 2113.56 | 100        |
| <b>12c</b>                                                                                                                                                                                                                                                                                                                                                                                                                                                                                                                                                                                                       | 4.117 | -5.304 | 2029.271 | -6.787 | 1607.94 | 100        |
| <p>Predicted octanol/water partition coefficient log P (acceptable range -2.0 to 6.5).<br/> Predicted aqueous solubility log S in mol/L (acceptable range: -6.5 to 0.5).<br/> Predicted Caco-2 cell permeability in nm/s (acceptable range: &lt; 25 is poor and &gt; 500 is great).<br/> Predicted IC<sub>50</sub> value for blockage of HERG K<sup>+</sup> channels (concern below -5.0).<br/> Predicted apparent MDCK cell permeability in nm/s (acceptable range: &lt; 25 is poor &gt; 500 is great).<br/> Percentage of human oral absorption (acceptable range: &lt; 25% is poor and &gt; 80% is high).</p> |       |        |          |        |         |            |

#### 4.in vitro study results

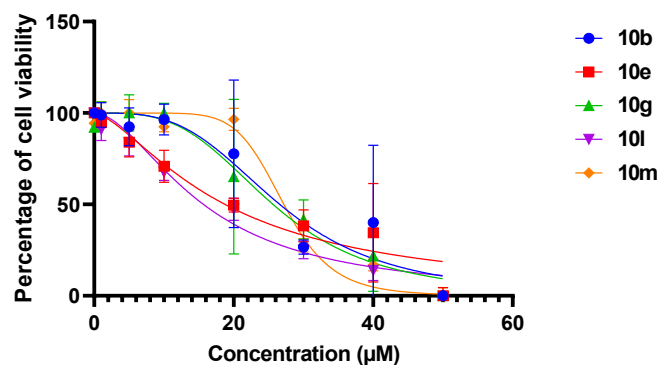

**Figure S81:** Cytotoxicity data for the synthesized compounds (**10b**, **10e**, **10g**, **10l**, and **10m**) against CAL-27 cell line using alamar blue assay

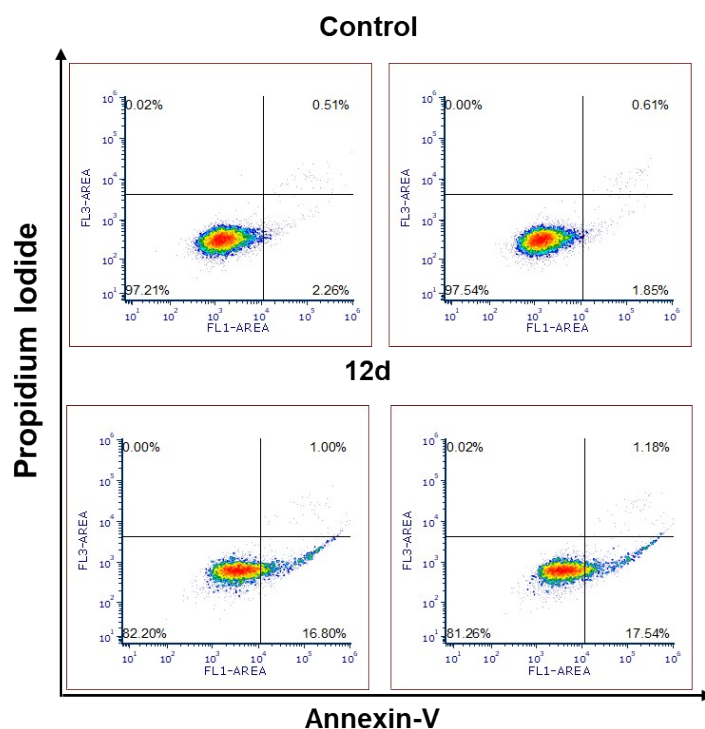

**Figure S82:** Apoptosis assay results of Compound **12d** performed in triplicate (n=2 and n=3 depicted here)

## 5.DFT results for the compound **12d**

**Table S3.** Reactivity parameters like global electrophilicity index ( $\omega$ ), chemical hardness ( $\eta$ ), and electronic chemical potential ( $\mu$ ) as calculated for compound **12d**.

| Compound | $E_{\text{HOMO}}$ | $E_{\text{LUMO}}$ | $\Delta E_{\text{LUMO}}$ | $\mu$ | $\eta$ | $\omega = \mu^2/2\eta$ |
|----------|-------------------|-------------------|--------------------------|-------|--------|------------------------|
|----------|-------------------|-------------------|--------------------------|-------|--------|------------------------|

|            | (eV)   | (eV)  | HOMO<br>(eV) | (eV)  | (eV)  | (eV)  |
|------------|--------|-------|--------------|-------|-------|-------|
| <b>12d</b> | -5.964 | 2.472 | 3.492        | 4.218 | 3.492 | 2.548 |
